# Supplementary material for: Silver-catalyzed stereoselective C-4 arylthiodifluoromethylation of coumarin-3-carboxylic acids via a double decarboxylative strategy
Source: Royal Society of Chemistry journal article supplement (doi:10.1039/d1qo01609a), 2021-12-14
Supplement: d1qo01609a1.pdf [file d1qo01609a1.pdf]

# Supporting information

## Silver-catalyzed stereoselective C-4 arylthiodifluoromethylation of coumarin-3-carboxylic acids *via* a double decarboxylative strategy

Zhiwei Chen\*, Jie Sun, Zhiwei Ke, Xiaoxiao Huang and Ziwei Li

*College of Pharmaceutical Sciences, Zhejiang University of Technology, Hangzhou*

*310014, P.R. China.*

\*Email: [chenzhiwei@zjut.edu.cn](mailto:chenzhiwei@zjut.edu.cn)

### Table of contents

|                                                                                 |     |
|---------------------------------------------------------------------------------|-----|
| 1. General information                                                          | S2  |
| 2. General procedure                                                            | S2  |
| 3. References                                                                   | S4  |
| 4. Analytical data of the synthesized derivatives                               | S5  |
| 5. <sup>1</sup> H NMR, <sup>13</sup> C NMR and <sup>19</sup> F NMR of compounds | S17 |
| 6. The HRMS spectra for Compound <b>4</b>                                       | S61 |
| 7. X-ray crystallography data of <b>3ab</b>                                     | S62 |

## 1. General information

All reagents were obtained from commercial sources and used without further purification unless otherwise indicated. The starting materials and **2n** were purchased from Aladdin (<https://www.aladdin-e.com/>). Silica gel for column chromatography was purchased from Qingdao Haiyang Chemical Co., Ltd. Reactions were stirred using Teflon-coated magnetic stir bars. Thin-layer chromatography (TLC) was used to monitor the reaction. Melting points were determined using a Büchi B-540 capillary melting point apparatus.  $^1\text{H}$  NMR (400/600 MHz),  $^{13}\text{C}$  NMR (100/150 MHz) and  $^{19}\text{F}$  NMR (376/565 MHz) spectra were recorded with  $\text{CDCl}_3$ . Chemical shifts are reported downfield from TMS (=0) for  $^1\text{H}$  NMR. For  $^{13}\text{C}\{^1\text{H}\}$  NMR, chemical shifts are reported in the scale relative to  $\text{CDCl}_3$  (= 77.0). High resolution mass spectrometry (HRMS) analysis was performed on an Agilent 1290–6540 UHPLC Q-ToF HR-MS System (ESI) spectrometer.

### 2.1 General procedure for the synthesis of products **1**<sup>1</sup>

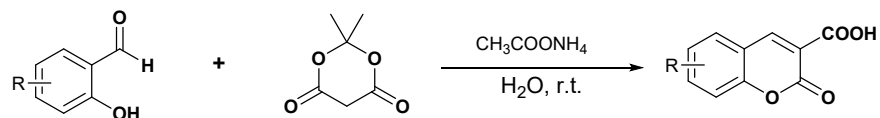

Add salicylaldehyde (2.0 g, 16.3 mmol), meldrum acid (3.5 g, 24.5 mmol) and ammonium acetate (125 mg, 1.6 mmol) to a 50.0 mL bottle, and add 25.0 mL of water. Stir at room temperature for 6 h. The reaction mixture was adjusted to pH 4 with 3M HCl (aq.), and then extracted with  $\text{CH}_2\text{Cl}_2$ . The organic layer was dried over  $\text{Na}_2\text{SO}_4$  and concentrated under reduced pressure. The residue was purified by flash column chromatography (n-hexane/ethyl acetate = 10/1 to 1/1, v/v) to obtain coumarin-3-carboxylic acids **1**.

## 2.2 General procedure for the synthesis of products 2<sup>2</sup>

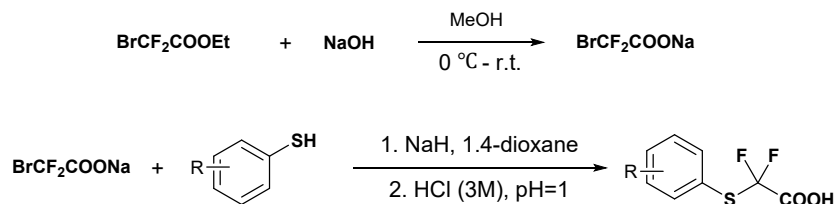

To a 250 mL oven-dried round-bottom flask equipped with a stir bar were added sodium hydroxide (4.0 g, 100.0 mmol) and MeOH (100 mL). Then, BrCF<sub>2</sub>CO<sub>2</sub>Et (20.3 g, 100.0 mmol) was added to the resulting solution at 0 °C. Upon addition, the mixture was warmed to room temperature and stirred for 24 h. The solvent was evaporated under vacuum and the residue was further dried under reduced pressure to give BrCF<sub>2</sub>CO<sub>2</sub>Na as a white solid (19.0 g, 97%) ◦

To a 100 mL oven-dried Schlenk tube equipped with a stir bar was added thiophenol (2.2 g, 20.0 mmol, 1.0 equiv.) under N<sub>2</sub> atmosphere. 1,4-Dioxane (30.0 mL) was added to dissolve the phenol or thiophenol. Then, NaH (60% purity) (880 mg, 22.0 mmol, 1.1 equiv.) and 1,4-dioxane (5.0 mL) were added under N<sub>2</sub> atmosphere. The solution was stirred at room temperature for 30 min. Then BrCF<sub>2</sub>COONa (4.3 g, 22.0 mmol, 1.1 equiv.) and 1,4-dioxane (5.0 mL) were added. After the mixture was heated at 60-70 °C in an oil bath for hours (monitor by TLC), then the mixture was cooled down to room temperature and acidified with 3M HCl (aq.) to pH 1. The mixture was extracted with ethyl acetate for three times. The combined organic phase was washed by saturated brines and dried over Na<sub>2</sub>SO<sub>4</sub>. After the solution was filtered and the solvent was evaporated under vacuum, the crude product was purified by flash column chromatography (n-hexane/ethyl acetate = 5:1, v/v) to give the product **2**.

### 3. References

- 1 a) B. Sepulveda, C. Quispe, M. Simirgiotis, A. Torres-Benítez, J. Reyes-Ortíz, C. Areche and O. García-Beltrán, Gastroprotective activity of synthetic coumarins: Role of endogenous prostaglandins, nitric oxide, non-protein sulfhydryls and vanilloid receptors, *Bioorg. Med. Chem. Lett.*, 2016, **26**, 5732-5735. b) B. Dong, W. Song, Y. Lu, X. Kong, A. H. Mehmood and W. Lin, An ultrasensitive ratiometric fluorescent probe based on the ICT-PET-FRET mechanism for the quantitative measurement of pH values in the endoplasmic reticulum (ER), *Chem. Commun.*, 2019, **55**, 10776-10779.
- 2 a) X.-L. Zhu, Y. Huang, X.-H. Xu and F.-L. Qing, Silver-Catalyzed C–H Aryloxydifluoromethylation and Arylthiodifluoromethylation of Heteroarenes, *Org. Lett.*, 2020, **22**, 5451-5455. b) M. Zhou, C. Ni, Z. He and J. Hu, O-Trifluoromethylation of Phenols: Access to Aryl Trifluoromethyl Ethers by O-Carboxydifluoromethylation and Decarboxylative Fluorination, *Org. Lett.*, 2016, **18**, 3754-3757.

## 4. Analytical data of the synthesized derivatives

### 4-(difluoro(phenylthio)methyl)chroman-2-one (3aa)

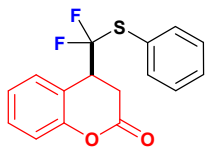

White solid; m.p.= 101.6-105.6 °C; 85% yield; <sup>1</sup>H NMR (400 MHz, CDCl<sub>3</sub>) δ 7.56 (d, *J* = 7.2 Hz, 2H), 7.41 (d, *J* = 8.8 Hz, 1H), 7.37 (d, *J* = 7.8 Hz, 3H), 7.33 (d, *J* = 7.2 Hz, 1H), 7.17 (t, *J* = 7.4 Hz, 1H), 7.11 (d, *J* = 8.2 Hz, 1H), 3.77 – 3.53 (m, 1H), 3.33 (d, *J* = 17.0 Hz, 1H), 2.90 (dd, *J* = 17.0, 7.4 Hz, 1H). <sup>13</sup>C NMR (101 MHz, CDCl<sub>3</sub>) δ 165.8, 152.2, 136.3, 130.6, 130.4, 130.1, 129.2 (t, *J*<sub>C-F</sub> = 283.8 Hz), 129.1, 125.1, 124.4, 117.5, 116.6, 43.9 (t, *J*<sub>C-F</sub> = 25.2 Hz), 29.8 (t, *J*<sub>C-F</sub> = 3.0 Hz). <sup>19</sup>F NMR (376 MHz, CDCl<sub>3</sub>) δ -75.9, -76.4, -78.2, -78.7. HRMS-ESI (m/z): calcd for C<sub>16</sub>H<sub>13</sub>F<sub>2</sub>O<sub>2</sub>S<sup>+</sup> [M+H]<sup>+</sup> 307.0599, found 307.0603.

### 4-(difluoro(phenylthio)methyl)-6-fluorochroman-2-one (3ba)

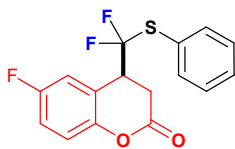

White solid; m.p.= 91.6-93.8 °C; 70% yield; <sup>1</sup>H NMR (600 MHz, CDCl<sub>3</sub>) δ 7.56 (d, *J* = 7.0 Hz, 2H), 7.43 (t, *J* = 7.4 Hz, 1H), 7.37 (t, *J* = 7.6 Hz, 2H), 7.10 – 7.06 (m, 2H), 7.05 (d, *J* = 9.8 Hz, 1H), 3.70 – 3.56 (m, 1H), 3.32 (dd, *J* = 17.0, 1.8 Hz, 1H), 2.89 (dd, *J* = 17.0, 7.6 Hz, 1H). <sup>13</sup>C NMR (151 MHz, CDCl<sub>3</sub>) δ 165.2, 159.5, 157.8, 148.4 (d, *J* = 2.8 Hz), 136.3, 130.3, 129.2, 129.0 (t, *J*<sub>C-F</sub> = 283.8 Hz), 125.0, 118.8 (d, *J* = 8.6 Hz), 117.3 (d, *J* = 23.4 Hz), 117.0 (d, *J* = 24.4 Hz), 44.0 (t, *J*<sub>C-F</sub> = 25.6 Hz), 29.5 (t, *J*<sub>C-F</sub> = 4.6 Hz). <sup>19</sup>F NMR (565 MHz, CDCl<sub>3</sub>) δ -75.6, -76.0, -78.4, -78.8, -117.7. HRMS-ESI (m/z): calcd for C<sub>16</sub>H<sub>12</sub>F<sub>3</sub>O<sub>2</sub>S<sup>+</sup> [M+H]<sup>+</sup> 325.0505, found 325.0508.

### 6-chloro-4-(difluoro(phenylthio)methyl)chroman-2-one (3ca)

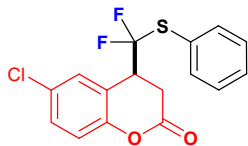

Yellow solid; m.p.= 109.5-112.8 °C; 65% yield; <sup>1</sup>H NMR (400 MHz, CDCl<sub>3</sub>) δ 7.57 (d, *J* = 7.2 Hz, 2H), 7.44 (t, *J* = 7.4 Hz, 1H), 7.39 (d, *J* = 7.8 Hz, 2H), 7.37 – 7.29 (m, 2H), 7.05 (d, *J* = 8.6 Hz, 1H), 3.85 – 3.51 (m, 1H), 3.34 (d, *J* = 17.0 Hz, 1H),

2.89 (dd,  $J = 17.0, 7.4$  Hz, 1H).  $^{13}\text{C}$  NMR (101 MHz,  $\text{CDCl}_3$ )  $\delta$  165.0, 150.8, 136.3, 130.5, 130.3, 130.3, 129.5, 129.3, 128.9 (t,  $J_{\text{C-F}} = 283.8$  Hz), 124.9, 118.8, 118.2, 43.8 (t,  $J_{\text{C-F}} = 25.2$  Hz), 29.6 (t,  $J_{\text{C-F}} = 3.0$  Hz).  $^{19}\text{F}$  NMR (376 MHz,  $\text{CDCl}_3$ )  $\delta$  -75.5, -76.0, -78.7, -79.2. HRMS-ESI (m/z): calcd for  $\text{C}_{16}\text{H}_{12}\text{ClF}_2\text{O}_2\text{S}^+$   $[\text{M}+\text{H}]^+$  341.0209, found 341.0214.

#### 6-bromo-4-(difluoro(phenylthio)methyl)chroman-2-one (3da)

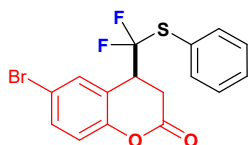

White solid; m.p.= 122.8-126.7 °C; 69% yield;  $^1\text{H}$  NMR (400 MHz,  $\text{CDCl}_3$ )  $\delta$  7.57 (d,  $J = 7.2$  Hz, 2H), 7.49 (dd,  $J = 8.6, 2.4$  Hz, 1H), 7.48 – 7.40 (m, 2H), 7.38 (t,  $J = 7.4$  Hz, 2H), 6.99 (d,  $J = 8.6$  Hz, 1H), 3.76 – 3.46 (m, 1H), 3.34 (d,  $J = 17.0$  Hz, 1H), 2.89 (dd,  $J = 17.0, 7.4$  Hz, 1H).  $^{13}\text{C}$  NMR (101 MHz,  $\text{CDCl}_3$ )  $\delta$  165.0, 151.4, 136.3, 133.4, 133.2, 130.3, 129.3, 129.0 (t,  $J_{\text{C-F}} = 283.8$  Hz), 124.9, 119.2, 118.6, 116.9, 43.7 (t,  $J_{\text{C-F}} = 25.2$  Hz), 29.6 (t,  $J_{\text{C-F}} = 3.0$  Hz).  $^{19}\text{F}$  NMR (376 MHz,  $\text{CDCl}_3$ )  $\delta$  -75.4, -76.0, -78.7, -79.3. HRMS-ESI (m/z): calcd for  $\text{C}_{16}\text{H}_{12}\text{BrF}_2\text{O}_2\text{S}^+$   $[\text{M}+\text{H}]^+$  384.9704, found 384.9706.

#### 4-(difluoro(phenylthio)methyl)-6-nitrochroman-2-one (3ea)

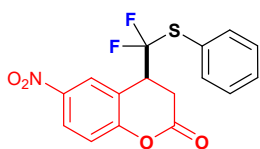

Brown solid; m.p.= 134.3-139.2 °C; 55% yield;  $^1\text{H}$  NMR (600 MHz,  $\text{CDCl}_3$ )  $\delta$  7.56 (d,  $J = 8.0$  Hz, 2H), 7.48 (dd,  $J = 8.6, 2.4$  Hz, 1H), 7.46 – 7.41 (m, 2H), 7.37 (t,  $J = 7.6$  Hz, 2H), 6.99 (d,  $J = 8.6$  Hz, 1H), 3.73 – 3.55 (m, 1H), 3.33 (d,  $J = 17.0$  Hz, 1H), 2.88 (dd,  $J = 17.0, 7.4$  Hz, 1H).  $^{13}\text{C}$  NMR (151 MHz,  $\text{CDCl}_3$ )  $\delta$  164.9, 151.4, 136.3, 133.4, 133.2, 130.3, 129.3, 129.0 (t,  $J_{\text{C-F}} = 283.8$  Hz), 125.0, 119.2, 118.7, 116.9, 43.8 (t,  $J_{\text{C-F}} = 24.2$  Hz), 29.6 (t,  $J_{\text{C-F}} = 3.0$  Hz).  $^{19}\text{F}$  NMR (565 MHz,  $\text{CDCl}_3$ )  $\delta$  -75.7, -76.2, -79.3, -79.9. HRMS-ESI (m/z): calcd for  $\text{C}_{16}\text{H}_{12}\text{F}_2\text{NO}_4\text{S}^+$   $[\text{M}+\text{H}]^+$  352.0450, found 352.0448.

#### 4-(difluoro(phenylthio)methyl)-6-methoxychroman-2-one (3fa)

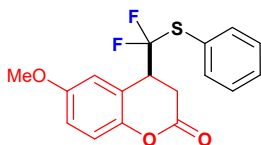

Yellow liquid; 73% yield;  $^1\text{H}$  NMR (400 MHz,  $\text{CDCl}_3$ )  $\delta$  7.56 (d,  $J$  = 7.0 Hz, 2H), 7.43 (t,  $J$  = 7.4 Hz, 1H), 7.36 (t,  $J$  = 7.2 Hz, 2H), 7.04 (d,  $J$  = 9.0 Hz, 1H), 6.91 (dd,  $J$  = 8.8, 2.8 Hz, 1H), 6.84 (s, 1H), 3.80 (s, 3H), 3.71 – 3.54 (m, 1H), 3.29 (d,  $J$  = 17.0 Hz, 1H), 2.88 (dd,  $J$  = 17.0, 7.4 Hz, 1H).  $^{13}\text{C}$  NMR (101 MHz,  $\text{CDCl}_3$ )  $\delta$  166.0, 155.9, 146.1, 136.3, 130.1, 129.1 (t,  $J_{\text{C-F}}$  = 288.8 Hz), 125.1, 118.2, 118.1, 117.3, 115.7, 115.3, 55.7, 44.3 (t,  $J_{\text{C-F}}$  = 28.2 Hz), 29.8 (t,  $J_{\text{C-F}}$  = 4.0 Hz).  $^{19}\text{F}$  NMR (376 MHz,  $\text{CDCl}_3$ )  $\delta$  -75.7, -76.3, -77.7, -78.3. HRMS-ESI (m/z): calcd for  $\text{C}_{17}\text{H}_{15}\text{F}_2\text{O}_3\text{S}^+$   $[\text{M}+\text{H}]^+$  337.0704, found 337.0709.

#### 7-chloro-4-(difluoro(phenylthio)methyl)chroman-2-one (3ga)

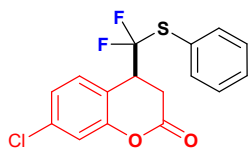

Yellow solid; m.p.= 103.2-104.3 °C; 53% yield;  $^1\text{H}$  NMR (600 MHz,  $\text{CDCl}_3$ )  $\delta$  7.55 (d,  $J$  = 7.8 Hz, 2H), 7.43 (t,  $J$  = 7.4 Hz, 1H), 7.36 (t,  $J$  = 7.6 Hz, 2H), 7.26 (d,  $J$  = 3.8 Hz, 1H), 7.15 (d,  $J$  = 8.2 Hz, 1H), 7.12 (s, 1H), 3.70 – 3.59 (m, 1H), 3.33 (d,  $J$  = 17.0 Hz, 1H), 2.89 (dd,  $J$  = 17.0, 7.4 Hz, 1H).  $^{13}\text{C}$  NMR (151 MHz,  $\text{CDCl}_3$ )  $\delta$  164.9, 152.7, 136.3, 135.9, 131.4, 130.2, 129.2, 129.0 (t,  $J_{\text{C-F}}$  = 283.8 Hz), 125.0, 124.7, 117.9, 115.2, 43.7 (t,  $J_{\text{C-F}}$  = 24.2 Hz), 29.6 (t,  $J_{\text{C-F}}$  = 3.0 Hz).  $^{19}\text{F}$  NMR (565 MHz,  $\text{CDCl}_3$ )  $\delta$  -76.0, -76.4, -78.4, -78.8. HRMS-ESI (m/z): calcd for  $\text{C}_{16}\text{H}_{12}\text{ClF}_2\text{O}_2\text{S}^+$   $[\text{M}+\text{H}]^+$  341.0209, found 341.0212.

#### 4-(difluoro(phenylthio)methyl)-7-methoxychroman-2-one (3ha)

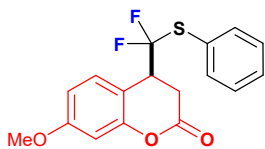

White solid; m.p.= 95.9-98.7 °C; 83% yield;  $^1\text{H}$  NMR (400 MHz,  $\text{CDCl}_3$ )  $\delta$  7.55 (d,  $J$  = 7.0 Hz, 2H), 7.42 (t,  $J$  = 7.4 Hz, 1H), 7.35 (t,  $J$  = 7.4 Hz, 2H), 7.22 (d,  $J$  = 8.4 Hz, 1H), 6.72 (dd,  $J$  = 8.4, 2.6 Hz, 1H), 6.64 (d,  $J$  = 2.6 Hz, 1H), 3.80 (s, 3H), 3.69 – 3.53 (m, 1H), 3.30 (d,  $J$  = 17.0 Hz, 1H), 2.88 (dd,  $J$  = 17.0, 7.6 Hz, 1H).  $^{13}\text{C}$  NMR (101 MHz,  $\text{CDCl}_3$ )  $\delta$  165.9, 161.2, 153.2, 136.3, 131.1, 130.0, 129.4 (t,  $J_{\text{C-F}}$  = 284.8 Hz),

129.1, 125.3, 110.8, 108.3, 102.6, 55.5, 43.4 (t,  $J_{\text{C-F}} = 24.2$  Hz), 29.9 (t,  $J_{\text{C-F}} = 3.0$  Hz).  $^{19}\text{F}$  NMR (376 MHz,  $\text{CDCl}_3$ )  $\delta$  -76.5, -77.0, -78.0, -78.5. HRMS-ESI (m/z): calcd for  $\text{C}_{17}\text{H}_{15}\text{F}_2\text{O}_3\text{S}^+ [\text{M}+\text{H}]^+$  337.0704, found 337.0707.

### 8-chloro-4-(difluoro(phenylthio)methyl)chroman-2-one (3ia)

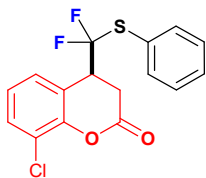

White solid; m.p.= 118.0-123.1°C; 67% yield;  $^1\text{H}$  NMR (600 MHz,  $\text{CDCl}_3$ )  $\delta$  7.55 (d,  $J = 8.0$  Hz, 2H), 7.43 (t,  $J = 7.4$  Hz, 1H), 7.36 (t,  $J = 7.6$  Hz, 2H), 7.26 (d,  $J = 8.2$  Hz, 1H), 7.15 (dd,  $J = 8.2, 2.2$  Hz, 1H), 7.12 (d,  $J = 2.2$  Hz, 1H), 3.73 – 3.54 (m, 1H), 3.33 (d,  $J = 17.0$  Hz, 1H), 2.89 (dd,  $J = 17.0, 7.4$  Hz, 1H).  $^{13}\text{C}$  NMR (151 MHz,  $\text{CDCl}_3$ )  $\delta$  164.8, 152.8, 136.3, 135.9, 131.4, 130.2, 129.2, 129.0 (t,  $J_{\text{C-F}} = 283.8$  Hz), 125.0, 124.7, 117.9, 115.2, 43.7 (t,  $J_{\text{C-F}} = 24.2$  Hz), 29.7 (t,  $J_{\text{C-F}} = 3.0$  Hz).  $^{19}\text{F}$  NMR (565 MHz,  $\text{CDCl}_3$ )  $\delta$  -76.0, -76.4, -78.4, -78.8. HRMS-ESI (m/z): calcd for  $\text{C}_{16}\text{H}_{12}\text{ClF}_2\text{O}_2\text{S}^+ [\text{M}+\text{H}]^+$  341.0209, found 341.0215.

### 4-(difluoro(phenylthio)methyl)-8-methoxychroman-2-one (3ja)

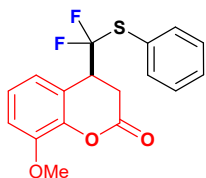

Yellow solid; m.p.= 121.4-126.2 °C; 72% yield;  $^1\text{H}$  NMR (600 MHz,  $\text{CDCl}_3$ )  $\delta$  7.58 (d,  $J = 7.0$  Hz, 2H), 7.43 (t,  $J = 7.4$  Hz, 1H), 7.37 (t,  $J = 7.8$  Hz, 2H), 7.12 (t,  $J = 8.0$  Hz, 1H), 6.99 (dd,  $J = 8.4, 1.4$  Hz, 1H), 6.93 (d,  $J = 7.7$  Hz, 1H), 3.92 (s, 1H), 3.73 – 3.64 (m, 1H), 3.33 (d,  $J = 17.0$  Hz, 1H), 2.92 (dd,  $J = 16.8, 7.4$  Hz, 1H).  $^{13}\text{C}$  NMR (151 MHz,  $\text{CDCl}_3$ )  $\delta$  165.9, 155.9, 146.2, 136.3, 130.1, 129.2 (t,  $J_{\text{C-F}} = 283.8$  Hz), 129.2, 125.2, 118.3, 117.4, 115.8, 115.3, 55.7, 44.3 (t,  $J_{\text{C-F}} = 25.6$  Hz), 29.8 (t,  $J_{\text{C-F}} = 3.0$  Hz).  $^{19}\text{F}$  NMR (565 MHz,  $\text{CDCl}_3$ )  $\delta$  -75.8, -76.2, -77.7, -78.1. HRMS-ESI (m/z): calcd for  $\text{C}_{17}\text{H}_{15}\text{F}_2\text{O}_3\text{S}^+ [\text{M}+\text{H}]^+$  337.0704, found 337.0708.

### 6,8-dichloro-4-(difluoro(phenylthio)methyl)chroman-2-one (3ka)



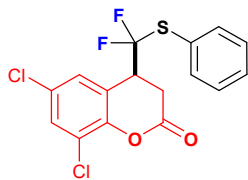

Brown solid; m.p.= 108.0-112.4 °C; 61% yield; <sup>1</sup>H NMR (600 MHz, CDCl<sub>3</sub>) δ 7.56 (d, *J* = 7.0 Hz, 2H), 7.45 – 7.42 (m, 2H), 7.38 (t, *J* = 7.6 Hz, 2H), 7.21 (d, *J* = 2.4 Hz, 1H), 3.69 – 3.57 (m, 1H), 3.36 (d, *J* = 17.0 Hz, 1H), 2.90 (dd, *J* = 17.0, 7.0 Hz, 1H). <sup>13</sup>C NMR (151 MHz, CDCl<sub>3</sub>) δ 163.7, 147.2, 137.1, 136.6, 136.3, 130.9, 130.7 (t, *J*<sub>C-F</sub> = 286.8 Hz), 130.4, 129.3, 128.7, 123.4, 119.6, 44.2 (t, *J*<sub>C-F</sub> = 25.6 Hz), 29.4 (t, *J*<sub>C-F</sub> = 3.0 Hz). <sup>19</sup>F NMR (565 MHz, CDCl<sub>3</sub>) δ -75.3, -75.7, -78.6, -79.0. HRMS-ESI (m/z): calcd for C<sub>16</sub>H<sub>11</sub>Cl<sub>2</sub>F<sub>2</sub>O<sub>2</sub>S<sup>+</sup> [M+H]<sup>+</sup> 374.9819, found 374.9815.

#### 4-(difluoro((4-fluorophenyl)thio)methyl)chroman-2-one (3ab)

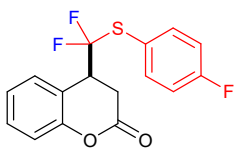

White solid; m.p.= 104.1-105.7 °C; 55% yield; <sup>1</sup>H NMR (400 MHz, CDCl<sub>3</sub>) δ 7.53 (dd, *J* = 8.4, 5.2 Hz, 2H), 7.39 (t, *J* = 7.8 Hz, 1H), 7.34 (d, *J* = 7.6 Hz, 1H), 7.18 (t, *J* = 7.6 Hz, 1H), 7.12 (d, *J* = 8.2 Hz, 1H), 7.05 (t, *J* = 8.6 Hz, 2H), 3.80 – 3.60 (m, 1H), 3.31 (d, 17.0 Hz, 1H), 2.92 (dd, *J* = 17.0, 7.4 Hz, 1H). <sup>13</sup>C NMR (101 MHz, CDCl<sub>3</sub>) δ 165.6, 152.3, 138.7, 138.6, 130.5, 130.5, 129.0 (t, *J*<sub>C-F</sub> = 284.8 Hz), 124.5, 120.3, 117.6, 116.5, 116.3, 44.1 (t, *J*<sub>C-F</sub> = 24.2 Hz), 29.8 (t, *J*<sub>C-F</sub> = 3.0 Hz). <sup>19</sup>F NMR (376 MHz, CDCl<sub>3</sub>) δ -76.5, -77.0, -77.9, -78.5, -109.8. HRMS-ESI (m/z): calcd for C<sub>16</sub>H<sub>12</sub>F<sub>3</sub>O<sub>2</sub>S<sup>+</sup> [M+H]<sup>+</sup> 325.0505, found 325.0498.

#### 4-(((4-chlorophenyl)thio)difluoromethyl)chroman-2-one (3ac)

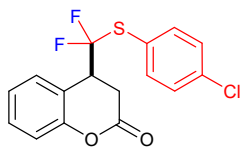

White solid; m.p.= 132.3-135.1 °C; 46% yield; <sup>1</sup>H NMR (400 MHz, CDCl<sub>3</sub>) δ 7.47 (d, *J* = 8.4 Hz, 2H), 7.39 (t, *J* = 8.0 Hz, 1H), 7.37 – 7.29 (m, 3H), 7.18 (t, *J* = 7.4 Hz, 1H), 7.11 (d, *J* = 8.2 Hz, 1H), 3.79 – 3.58 (m, 1H), 3.30 (d, *J* = 17.0 Hz, 1H), 2.92 (dd, *J* = 17.0, 7.4 Hz, 1H). <sup>13</sup>C NMR (101 MHz, CDCl<sub>3</sub>) δ 165.6, 152.3, 137.6, 136.8, 130.6, 130.5, 129.4, 129.0 (t, *J*<sub>C-F</sub> = 285.8 Hz), 124.5, 123.5, 117.6, 116.4, 44.2 (t,

$J_{C-F} = 25.2$  Hz), 29.8 (t,  $J_{C-F} = 4.0$  Hz).  $^{19}\text{F}$  NMR (376 MHz,  $\text{CDCl}_3$ )  $\delta$  -76.1, -76.7, -77.4, -77.9. HRMS-ESI (m/z): calcd for  $\text{C}_{16}\text{H}_{12}\text{ClF}_2\text{O}_2\text{S}^+ [\text{M}+\text{H}]^+$  341.0209, found 341.0206.

#### 4-(((4-bromophenyl)thio)difluoromethyl)chroman-2-one (3ad)

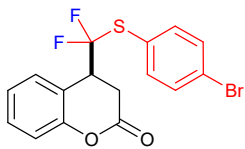

White solid; m.p.= 149.5-151.7 °C; 61% yield;  $^1\text{H}$  NMR (400 MHz,  $\text{CDCl}_3$ )  $\delta$  7.48 (d,  $J = 8.4$  Hz, 2H), 7.39 (dd,  $J = 8.8, 7.0$  Hz, 3H), 7.33 (d,  $J = 7.6$  Hz, 1H), 7.17 (t,  $J = 7.4$  Hz, 1H), 7.11 (d,  $J = 8.2$  Hz, 1H), 3.83 – 3.55 (m, 1H), 3.29 (d,  $J = 17.0$  Hz, 1H), 2.92 (dd,  $J = 17.0, 7.4$  Hz, 1H).  $^{13}\text{C}$  NMR (101 MHz,  $\text{CDCl}_3$ )  $\delta$  165.6, 152.2, 137.7, 132.4, 130.6, 130.5, 129.0 (t,  $J_{C-F} = 285.8$  Hz), 125.1, 124.5, 124.1, 117.6, 116.4, 44.1 (t,  $J_{C-F} = 25.2$  Hz), 29.8 (t,  $J_{C-F} = 3.0$  Hz).  $^{19}\text{F}$  NMR (376 MHz,  $\text{CDCl}_3$ )  $\delta$  -76.0, -76.6, -77.3, -77.8. HRMS-ESI (m/z): calcd for  $\text{C}_{16}\text{H}_{12}\text{BrF}_2\text{O}_2\text{S}^+ [\text{M}+\text{H}]^+$  384.9704, found 384.9700.

#### 4-(difluoro(p-tolylthio)methyl)chroman-2-one (3ae)

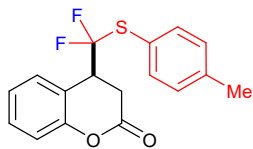

White solid; m.p.= 105.0-106.8 °C; 65% yield;  $^1\text{H}$  NMR (600 MHz,  $\text{CDCl}_3$ )  $\delta$  7.43 (d,  $J = 7.8$  Hz, 2H), 7.37 (t,  $J = 8.0$  Hz, 1H), 7.33 (d,  $J = 7.8$  Hz, 1H), 7.16 (d,  $J = 7.6$  Hz, 3H), 7.10 (d,  $J = 8.0$  Hz, 1H), 3.74 – 3.65 (m, 1H), 3.32 (d,  $J = 17.0$  Hz, 1H), 2.89 (dd,  $J = 17.0, 7.4$  Hz, 1H), 2.35 (s, 3H).  $^{13}\text{C}$  NMR (151 MHz,  $\text{CDCl}_3$ )  $\delta$  165.8, 152.3, 140.6, 136.4, 130.6, 130.4, 130.0, 129.2 (t,  $J_{C-F} = 283.8$  Hz), 124.4, 121.7, 117.5, 116.8, 43.9 (t,  $J_{C-F} = 24.2$  Hz), 29.9 (t,  $J_{C-F} = 3.0$  Hz), 21.2.  $^{19}\text{F}$  NMR (565 MHz,  $\text{CDCl}_3$ )  $\delta$  -76.2, -76.6, -78.8, -79.1. HRMS-ESI (m/z): calcd for  $\text{C}_{17}\text{H}_{15}\text{F}_2\text{O}_2\text{S}^+ [\text{M}+\text{H}]^+$  321.0755, found 321.0758.

#### 4-(difluoro((4-methoxyphenyl)thio)methyl)chroman-2-one (3af)

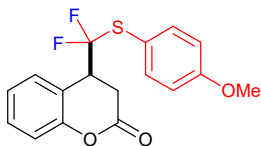

Yellow solid; m.p.= 109.3-113.6 °C; 68% yield;  $^1\text{H}$  NMR (400 MHz,  $\text{CDCl}_3$ )  $\delta$  7.47 (d,  $J = 8.8$  Hz, 2H), 7.38 (t,  $J = 7.8$  Hz, 1H), 7.33 (d,  $J = 7.6$  Hz, 1H), 7.16 (t,  $J = 7.6$  Hz, 1H), 7.11 (d,  $J = 8.2$  Hz, 1H), 6.88 (d,  $J = 8.6$  Hz, 2H), 3.85 – 3.78 (m, 3H), 3.71 – 3.57 (m, 1H), 3.33 (d,  $J = 17.0$  Hz, 1H), 2.90 (dd,  $J = 17.0, 7.4$  Hz, 1H).  $^{13}\text{C}$  NMR (101 MHz,  $\text{CDCl}_3$ )  $\delta$  165.8, 161.3, 152.3, 138.2, 130.6, 130.4, 129.1 (t,  $J_{\text{C-F}} = 283.8$  Hz), 124.4, 117.5, 116.8, 115.5, 114.7, 55.4, 43.8 (t,  $J_{\text{C-F}} = 25.2$  Hz), 29.9 (t,  $J_{\text{C-F}} = 3.0$  Hz).  $^{19}\text{F}$  NMR (376 MHz,  $\text{CDCl}_3$ )  $\delta$  -76.7, -77.2, -79.3, -79.9. HRMS-ESI (m/z): calcd for  $\text{C}_{17}\text{H}_{15}\text{F}_2\text{O}_3\text{S}^+ [\text{M}+\text{H}]^+$  337.0704, found 337.0709.

#### 4-(((3-chlorophenyl)thio)difluoromethyl)chroman-2-one (3ag)

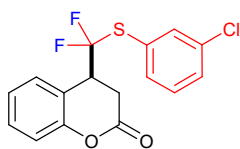

White solid; m.p.= 104.3-106.0 °C; 64% yield;  $^1\text{H}$  NMR (400 MHz,  $\text{CDCl}_3$ )  $\delta$  7.67 (d,  $J = 7.0$  Hz, 1H), 7.49 (d,  $J = 7.2$  Hz, 1H), 7.44 – 7.32 (m, 3H), 7.30 – 7.21 (m, 1H), 7.18 (t,  $J = 7.4$  Hz, 1H), 7.12 (d,  $J = 8.2$  Hz, 1H), 3.78 – 3.65 (m, 1H), 3.39 (d,  $J = 17.0$  Hz, 1H), 2.94 (dd,  $J = 17.0, 7.4$  Hz, 1H).  $^{13}\text{C}$  NMR (101 MHz,  $\text{CDCl}_3$ )  $\delta$  165.7, 152.3, 140.0, 138.7, 131.6, 130.6, 130.5, 130.4, 129.2 (t,  $J_{\text{C-F}} = 285.8$  Hz), 127.3, 124.8, 124.4, 117.5, 116.4, 44.3 (t,  $J_{\text{C-F}} = 24.2$  Hz), 29.9 (t,  $J_{\text{C-F}} = 3.0$  Hz).  $^{19}\text{F}$  NMR (376 MHz,  $\text{CDCl}_3$ )  $\delta$  -75.1, -75.7, -78.0, -78.6. HRMS-ESI (m/z): calcd for  $\text{C}_{16}\text{H}_{12}\text{ClF}_2\text{O}_2\text{S}^+ [\text{M}+\text{H}]^+$  341.0209, found 341.0212.

#### 4-(difluoro(m-tolylthio)methyl)chroman-2-one (3ah)

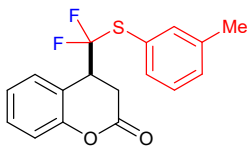

Yellow solid; m.p.= 81.3-83.2 °C; 68% yield;  $^1\text{H}$  NMR (600 MHz,  $\text{CDCl}_3$ )  $\delta$  7.39 – 7.31 (m, 4H), 7.25 (d,  $J = 8.4$  Hz, 1H), 7.22 (d,  $J = 3.6$  Hz, 1H), 7.16 (t,  $J = 7.4$  Hz, 1H), 7.10 (d,  $J = 8.2$  Hz, 1H), 3.71 – 3.62 (m, 1H), 3.32 (d,  $J = 17.0$  Hz, 1H), 2.90 (dd,  $J = 17.0, 7.4$  Hz, 1H), 2.33 (s, 3H).  $^{13}\text{C}$  NMR (151 MHz,  $\text{CDCl}_3$ )  $\delta$  165.7, 152.3, 139.1, 136.8, 133.3, 130.9, 130.6, 130.4, 129.3 (t,  $J_{\text{C-F}} = 283.8$  Hz), 128.9, 124.4, 117.5,

117.3, 116.7, 44.1 (t,  $J_{C-F}$  = 24.2 Hz), 29.9 (t,  $J_{C-F}$  = 3.0 Hz), 21.1.  $^{19}\text{F}$  NMR (565 MHz,  $\text{CDCl}_3$ )  $\delta$  -75.9, -76.2, -78.2, -78.6. HRMS-ESI (m/z): calcd for  $\text{C}_{17}\text{H}_{15}\text{F}_2\text{O}_2\text{S}^+$   $[\text{M}+\text{H}]^+$  321.0755, found 321.0759.

#### 4-(((2-chlorophenyl)thio)difluoromethyl)chroman-2-one (3ai)

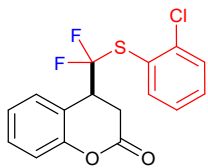

White solid; m.p.= 92.8-95.1 °C; 43% yield;  $^1\text{H}$  NMR (600 MHz,  $\text{CDCl}_3$ )  $\delta$  7.67 (d,  $J$  = 7.8 Hz, 1H), 7.49 (d,  $J$  = 8.0 Hz, 1H), 7.38 (dd,  $J$  = 18.2, 7.2 Hz, 3H), 7.26 (t,  $J$  = 3.6 Hz, 1H), 7.17 (t,  $J$  = 7.4 Hz, 1H), 7.11 (d,  $J$  = 8.2 Hz, 1H), 3.76 – 3.67 (m, 1H), 3.39 (d,  $J$  = 17.0 Hz, 1H), 2.94 (dd,  $J$  = 17.0, 7.4 Hz, 1H).  $^{13}\text{C}$  NMR (151 MHz,  $\text{CDCl}_3$ )  $\delta$  165.6, 152.3, 140.0, 138.7, 131.6, 130.6, 130.5, 130.4, 129.3 (t,  $J_{C-F}$  = 285.4 Hz), 127.3, 124.9, 124.4, 117.5, 116.4, 44.3 (t,  $J_{C-F}$  = 24.2 Hz), 29.9 (t,  $J_{C-F}$  = 3.0 Hz).  $^{19}\text{F}$  NMR (565 MHz,  $\text{CDCl}_3$ )  $\delta$  -75.2, -75.5, -78.0, -78.3. HRMS-ESI (m/z): calcd for  $\text{C}_{16}\text{H}_{12}\text{ClF}_2\text{O}_2\text{S}^+$   $[\text{M}+\text{H}]^+$  341.0209, found 341.0215.

#### 4-(difluoro(o-tolylthio)methyl)chroman-2-one (3aj)

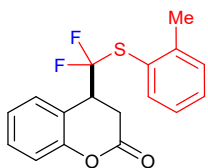

White solid; m.p.= 83.1-84.2 °C; 46% yield;  $^1\text{H}$  NMR (600 MHz,  $\text{CDCl}_3$ )  $\delta$  7.54 (d,  $J$  = 7.8 Hz, 1H), 7.41 – 7.35 (m, 2H), 7.32 (t,  $J$  = 7.4 Hz, 1H), 7.28 (d,  $J$  = 7.6 Hz, 1H), 7.17 (q,  $J$  = 7.8 Hz, 2H), 7.12 (d,  $J$  = 8.2 Hz, 1H), 3.81 – 3.62 (m, 1H), 3.34 (dd,  $J$  = 17.0, 1H), 2.93 (dd,  $J$  = 17.0, 7.4 Hz, 1H), 2.43 (s, 3H).  $^{13}\text{C}$  NMR (151 MHz,  $\text{CDCl}_3$ )  $\delta$  165.8, 152.3, 144.0, 138.2, 130.8, 130.6, 130.4, 129.6 (t,  $J_{C-F}$  = 283.8 Hz), 126.5, 126.2, 124.4, 124.4, 117.5, 116.7, 44.3 (t,  $J_{C-F}$  = 24.2 Hz), 30.0 (t,  $J_{C-F}$  = 3.0 Hz), 21.3.  $^{19}\text{F}$  NMR (565 MHz,  $\text{CDCl}_3$ )  $\delta$  -75.9, -76.2, -77.2, -77.6. HRMS-ESI (m/z): calcd for  $\text{C}_{17}\text{H}_{15}\text{F}_2\text{O}_2\text{S}^+$   $[\text{M}+\text{H}]^+$  321.0755, found 321.0758.

#### 4-(((2,4-dimethylphenyl)thio)difluoromethyl)chroman-2-one (3ak)

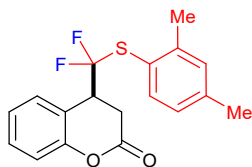

White solid; m.p.= 79.5-81.0 °C; 65% yield;  $^1\text{H}$  NMR (600 MHz,  $\text{CDCl}_3$ )  $\delta$  7.41 (d,  $J$  = 8.0 Hz, 1H), 7.37 (m,  $J$  = 7.4 Hz, 2H), 7.17 (t,  $J$  = 7.6 Hz, 1H), 7.13 – 7.07 (m, 2H), 6.97 (d,  $J$  = 8.0 Hz, 1H), 3.76 – 3.59 (m, 1H), 3.33 (d,  $J$  = 17.0 Hz, 1H), 2.91 (dd,  $J$  = 17.0, 7.4 Hz, 1H), 2.38 (s, 3H), 2.30 (s, 3H).  $^{13}\text{C}$  NMR (151 MHz,  $\text{CDCl}_3$ )  $\delta$  165.8, 152.3, 143.8, 141.0, 138.2, 131.7, 130.6, 130.3, 129.6 (t,  $J_{\text{C-F}}$  = 283.8 Hz), 127.3, 124.4, 120.9, 117.5, 116.8, 44.3 (t,  $J_{\text{C-F}}$  = 24.2 Hz), 30.0 (t,  $J_{\text{C-F}}$  = 3.0 Hz), 21.2, 21.1.  $^{19}\text{F}$  NMR (565 MHz,  $\text{CDCl}_3$ )  $\delta$  -76.2, -76.5, -77.7, -78.0. HRMS-ESI (m/z): calcd for  $\text{C}_{18}\text{H}_{17}\text{F}_2\text{O}_2\text{S}^+ [\text{M}+\text{H}]^+$  335.0912, found 335.0915.

#### 4-(((3,5-dimethylphenyl)thio)difluoromethyl)chroman-2-one (3al)

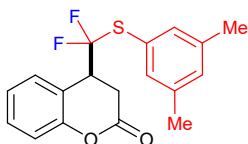

Yellow solid; m.p.= 93.4-95.8 °C; 70% yield;  $^1\text{H}$  NMR (600 MHz,  $\text{CDCl}_3$ )  $\delta$  7.38 (t,  $J$  = 7.8 Hz, 1H), 7.34 (d,  $J$  = 7.6 Hz, 1H), 7.20 – 7.12 (m, 3H), 7.11 (d,  $J$  = 8.2 Hz, 1H), 7.03 (s, 1H), 3.72 – 3.59 (m, 1H), 3.33 (d,  $J$  = 17.0 Hz, 1H), 2.90 (dd,  $J$  = 17.0, 7.4 Hz, 1H), 2.30 (s, 6H).  $^{13}\text{C}$  NMR (151 MHz,  $\text{CDCl}_3$ )  $\delta$  165.8, 152.3, 138.8, 133.8, 131.9, 130.6, 130.4, 129.3 (t,  $J_{\text{C-F}}$  = 283.8 Hz), 124.6, 124.4, 117.5, 116.8, 44.1 (t,  $J_{\text{C-F}}$  = 24.2 Hz), 29.9 (t,  $J_{\text{C-F}}$  = 3.0 Hz), 21.0.  $^{19}\text{F}$  NMR (565 MHz,  $\text{CDCl}_3$ )  $\delta$  -75.9, -76.2, -78.3, -78.7. HRMS-ESI (m/z): calcd for  $\text{C}_{18}\text{H}_{17}\text{F}_2\text{O}_2\text{S}^+ [\text{M}+\text{H}]^+$  335.0912, found 335.0914.

#### 2-(difluoro(phenylthio)methyl)chroman-4-one (5aa)

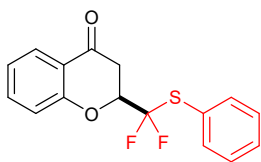

Colorless liquid; 55% yield;  $^1\text{H}$  NMR (600 MHz,  $\text{CDCl}_3$ )  $\delta$  7.89 (dd,  $J$  = 8.0, 1.8 Hz, 1H), 7.66 (d,  $J$  = 7.6 Hz, 2H), 7.53 (t,  $J$  = 7.0 Hz, 1H), 7.45 (t,  $J$  = 7.6 Hz, 1H), 7.39 (t,  $J$  = 7.6 Hz, 2H), 7.12 – 7.05 (m, 2H), 4.85 – 4.55 (m, 1H), 3.06 (dd,  $J$  = 17.0, 12.6 Hz, 1H), 2.94 (dd,  $J$  = 17.0, 3.6 Hz, 1H).  $^{13}\text{C}$  NMR (151 MHz,  $\text{CDCl}_3$ )  $\delta$  189.5,

159.7, 136.7, 136.5, 136.4, 130.3, 129.2 (t,  $J_{C-F} = 12.0$  Hz), 126.9, 125.0, 122.4, 120.8, 118.0, 77.9 (dd,  $J_{C-F} = 32.0, 27.8$  Hz), 36.9.  $^{19}\text{F}$  NMR (565 MHz,  $\text{CDCl}_3$ )  $\delta$  -82.3, -82.7, -86.3, -86.7. HRMS-ESI (m/z): calcd for  $\text{C}_{16}\text{H}_{13}\text{F}_2\text{O}_2\text{S}^+ [\text{M}+\text{H}]^+$  307.0599, found 307.0595.

### 2-(difluoro(phenylthio)methyl)-6-methylchroman-4-one (5ba)

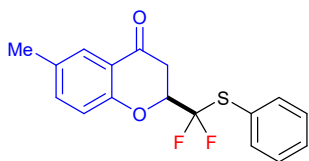

Colorless liquid; 50% yield;  $^1\text{H}$  NMR (600 MHz,  $\text{CDCl}_3$ )  $\delta$  7.8 (d,  $J = 8.0$  Hz, 1H), 7.7 (d,  $J = 7.0$  Hz, 2H), 7.5 – 7.4 (m, 1H), 7.4 (t,  $J = 7.4$  Hz, 2H), 6.9 – 6.9 (m, 2H), 4.8 – 4.6 (m, 1H), 3.0 (dd,  $J = 17.0, 12.6$  Hz, 1H), 2.9 (dd,  $J = 17.0, 3.4$  Hz, 1H), 2.4 (s, 3H).  $^{13}\text{C}$  NMR (151 MHz,  $\text{CDCl}_3$ )  $\delta$  189.2, 159.8, 148.2, 136.7, 130.2, 129.2, 127.2 (t,  $J_{C-F} = 282.4$  Hz), 126.8, 125.0, 123.7, 118.5, 118.0, 77.9 (dd,  $J_{C-F} = 31.8, 27.8$  Hz), 36.8, 21.9.  $^{19}\text{F}$  NMR (565 MHz,  $\text{CDCl}_3$ )  $\delta$  -82.3, -82.7, -86.3, -86.7. HRMS-ESI (m/z): calcd for  $\text{C}_{17}\text{H}_{15}\text{F}_2\text{O}_2\text{S}^+ [\text{M}+\text{H}]^+$  321.0755, found 321.0759.

### 2-(difluoro(phenylthio)methyl)-7-methylchroman-4-one (5ca)

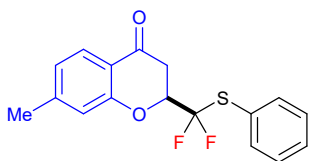

White solid; m.p. = 83.2-84.5 °C; 52% yield;  $^1\text{H}$  NMR (600 MHz,  $\text{CDCl}_3$ )  $\delta$  7.8 (d,  $J = 8.0$  Hz, 1H), 7.7 (d,  $J = 7.4$  Hz, 2H), 7.4 (t,  $J = 7.4$  Hz, 1H), 7.4 (t,  $J = 7.6$  Hz, 2H), 6.9 – 6.9 (m, 2H), 4.8 – 4.5 (m, 1H), 3.0 (dd,  $J = 17.0, 12.6$  Hz, 1H), 2.9 (dd,  $J = 17.0, 3.6$  Hz, 1H), 2.4 (s, 3H).  $^{13}\text{C}$  NMR (151 MHz,  $\text{CDCl}_3$ )  $\delta$  189.1, 159.7, 148.1, 136.7, 130.2, 129.2, 127.1 (t,  $J_{C-F} = 282.4$  Hz), 126.8, 125.0, 123.7, 118.5, 118.0, 77.9 (dd,  $J_{C-F} = 31.8, 27.8$  Hz), 36.8, 21.9.  $^{19}\text{F}$  NMR (565 MHz,  $\text{CDCl}_3$ )  $\delta$  -82.3, -82.6, -86.3, -86.7. HRMS-ESI (m/z): calcd for  $\text{C}_{17}\text{H}_{15}\text{F}_2\text{O}_2\text{S}^+ [\text{M}+\text{H}]^+$  321.0755, found 321.0760.

### 2-(difluoro((4-methoxyphenyl)thio)methyl)chroman-4-one (5ab)

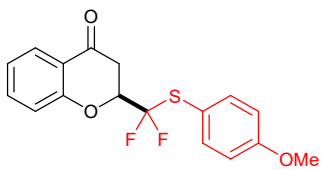

White solid; m.p.= 83.4-84.6 °C; 64% yield; <sup>1</sup>H NMR (600 MHz, CDCl<sub>3</sub>) δ 7.88 (dd, *J* = 7.8, 1.8 Hz, 1H), 7.57 (d, *J* = 8.8 Hz, 2H), 7.56 – 7.50 (m, 1H), 7.17 – 6.99 (m, 2H), 6.90 (d, *J* = 8.8 Hz, 2H), 4.76 – 4.56 (m, 1H), 3.81 (s, 3H), 3.05 (dd, *J* = 17.0, 12.6 Hz, 1H), 2.93 (dd, *J* = 17.0, 3.6 Hz, 1H). <sup>13</sup>C NMR (151 MHz, CDCl<sub>3</sub>) δ 189.6, 161.4, 159.8, 138.5, 136.4, 127.0 (t, *J*<sub>C-F</sub> = 280.8 Hz), 126.9, 122.4, 120.8, 118.0, 115.3, 114.8, 77.6 (dd, *J*<sub>C-F</sub> = 32.0, 27.8 Hz), 55.3, 36.9. <sup>19</sup>F NMR (565 MHz, CDCl<sub>3</sub>) δ -83.3, -83.7, -87.5, -87.8. HRMS-ESI (m/z): calcd for C<sub>17</sub>H<sub>15</sub>F<sub>2</sub>O<sub>3</sub>S<sup>+</sup> [M+H]<sup>+</sup> 337.0704, found 337.0700.

### 2-(((4-chlorophenyl)thio)difluoromethyl)chroman-4-one (5ac)

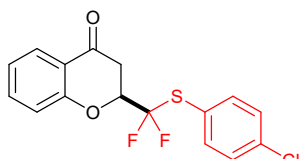

Yellow solid; m.p.= 107.8-110.0 °C; 61% yield; <sup>1</sup>H NMR (600 MHz, CDCl<sub>3</sub>) δ 7.89 (dd, *J* = 8.2, 1.8 Hz, 1H), 7.59 (d, *J* = 8.4 Hz, 2H), 7.57 – 7.49 (m, 1H), 7.37 (d, *J* = 8.6 Hz, 2H), 7.13 – 7.05 (m, 2H), 4.78 – 4.69 (m, 1H), 3.05 (dd, *J* = 17.0, 12.6 Hz, 1H), 2.94 (dd, *J* = 17.0, 3.6 Hz, 1H). <sup>13</sup>C NMR (151 MHz, CDCl<sub>3</sub>) δ 189.2, 159.6, 137.9, 137.7, 137.0, 136.5, 129.5 (t, *J*<sub>C-F</sub> = 12.0 Hz), 127.0, 123.3, 122.5, 120.8, 117.9, 77.9 (dd, *J*<sub>C-F</sub> = 31.8, 28.0 Hz), 36.9. <sup>19</sup>F NMR (565 MHz, CDCl<sub>3</sub>) δ -81.9, -82.2, -86.1, -86.4. HRMS-ESI (m/z): calcd for C<sub>16</sub>H<sub>12</sub>ClF<sub>2</sub>O<sub>2</sub>S<sup>+</sup> [M+H]<sup>+</sup> 341.0209, found 341.0204.

### 2-(((4-bromophenyl)thio)difluoromethyl)chroman-4-one (5ad)

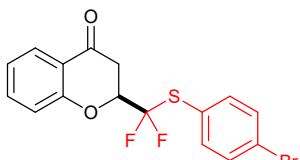

Yellow solid; m.p.= 93.3-95.1 °C; 60% yield; <sup>1</sup>H NMR (600 MHz, CDCl<sub>3</sub>) δ 7.89 (dd, *J* = 8.2, 1.8 Hz, 1H), 7.53 (dd, *J* = 8.8, 3.0 Hz, 5H), 7.09 (t, *J* = 7.4 Hz, 2H), 4.81 – 4.61 (m, 1H), 3.05 (dd, *J* = 17.0, 12.6 Hz, 1H), 2.94 (dd, *J* = 17.0, 3.6

Hz, 1H).  $^{13}\text{C}$  NMR (151 MHz,  $\text{CDCl}_3$ )  $\delta$  189.2, 159.6, 138.1, 137.8, 136.5, 132.5 (t,  $J_{\text{C-F}} = 12.0$  Hz), 127.0, 125.3, 124.0, 122.5, 120.7, 117.9, 77.9 (dd,  $J_{\text{C-F}} = 31.8, 28.0$  Hz), 36.9.  $^{19}\text{F}$  NMR (565 MHz,  $\text{CDCl}_3$ )  $\delta$  -81.8, -82.2, -86.0, -86.4. HRMS-ESI (m/z): calcd for  $\text{C}_{16}\text{H}_{12}\text{BrF}_2\text{O}_2\text{S}^+ [\text{M}+\text{H}]^+$  384.9704, found 384.9700.

### 2-(((2,4-dimethylphenyl)thio)difluoromethyl)chroman-4-one (5ae)

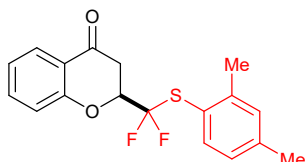

Yellow solid; m.p.= 79.0-80.2 °C; 76% yield;  $^1\text{H}$  NMR (600 MHz,  $\text{CDCl}_3$ )  $\delta$  7.9 (dd,  $J = 7.8, 1.8$  Hz, 1H), 7.6 – 7.5 (m, 2H), 7.2 – 7.1 (m, 3H), 7.0 (d,  $J = 7.8$  Hz, 1H), 4.8 – 4.6 (m, 1H), 3.1 (dd,  $J = 17.0, 12.6$  Hz, 1H), 2.9 (dd,  $J = 17.0, 3.4$  Hz, 1H), 2.5 (s, 3H), 2.3 (s, 3H).  $^{13}\text{C}$  NMR (151 MHz,  $\text{CDCl}_3$ )  $\delta$  189.6, 159.8, 144.0, 141.2, 138.5, 136.4, 131.8, 127.5, 127.5 (t,  $J_{\text{C-F}} = 282.4$  Hz), 126.9, 122.4, 120.8, 120.8, 118.0, 77.9 (dd,  $J_{\text{C-F}} = 32.4, 27.8$  Hz), 37.0, 21.3, 21.2.  $^{19}\text{F}$  NMR (565 MHz,  $\text{CDCl}_3$ )  $\delta$  -81.9, -82.2, -86.7, -87.1. HRMS-ESI (m/z): calcd for  $\text{C}_{18}\text{H}_{17}\text{F}_2\text{O}_2\text{S}^+ [\text{M}+\text{H}]^+$  335.0912, found 335.0916.

### 4-(difluoro(phenylthio)methyl)chroman-2-one-3,3- $d_2$ (3aa')

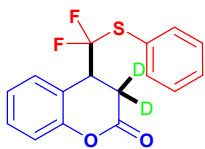

White solid; m.p.= 101.2-104.8 °C; 83% yield;  $^1\text{H}$  NMR (600 MHz,  $\text{CDCl}_3$ )  $\delta$  7.55 (d,  $J = 7.8$  Hz, 2H), 7.41 (t,  $J = 7.4$  Hz, 1H), 7.36 (d,  $J = 6.0$  Hz, 2H), 7.35 – 7.31 (m, 2H), 7.16 (t,  $J = 7.6$  Hz, 1H), 7.09 (d,  $J = 8.2$  Hz, 1H), 3.65 (dd,  $J = 14.4, 10.8$  Hz, 1H). HRMS-ESI (m/z): calcd for  $\text{C}_{16}\text{H}_{11}\text{D}_2\text{F}_2\text{O}_2\text{S}^+ [\text{M}+\text{H}]^+$  309.0724, found 309.0722.



## 5. $^1\text{H}$ NMR, $^{13}\text{C}$ NMR and $^{19}\text{F}$ NMR of compounds

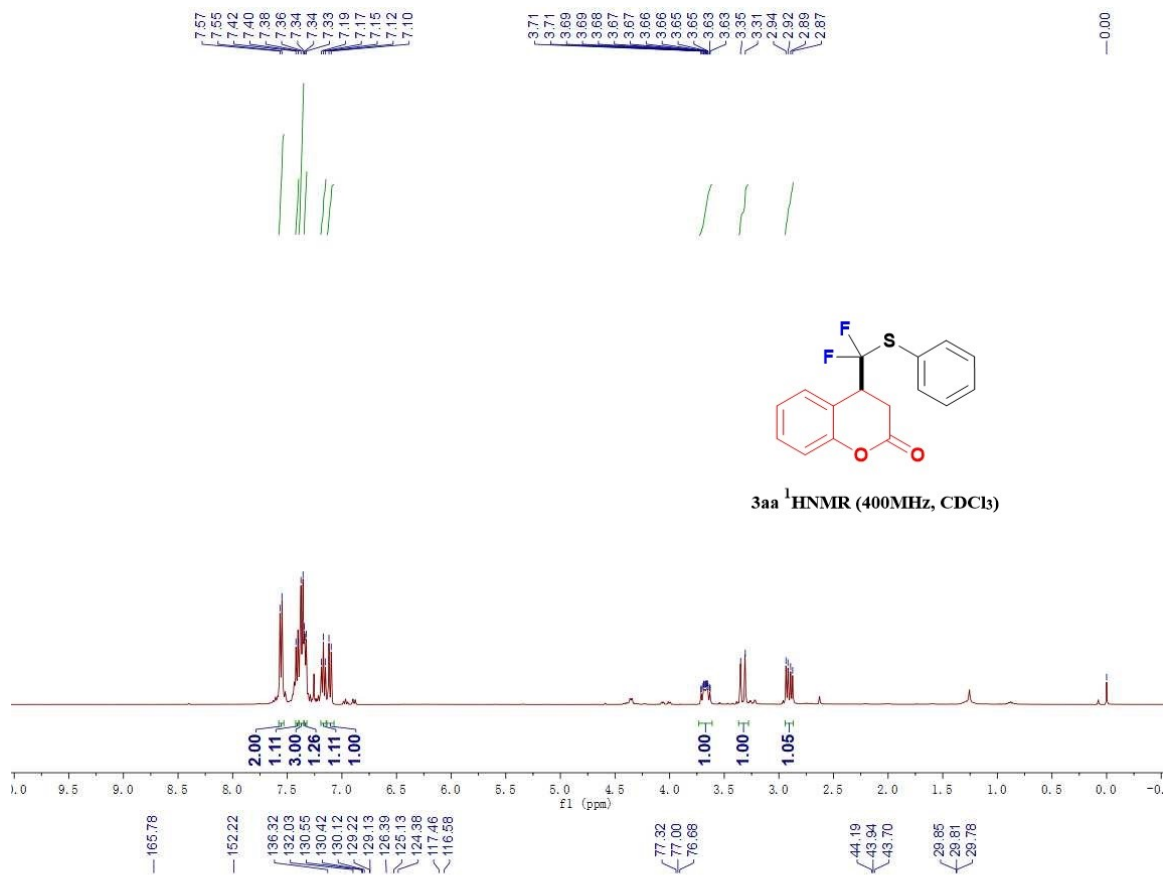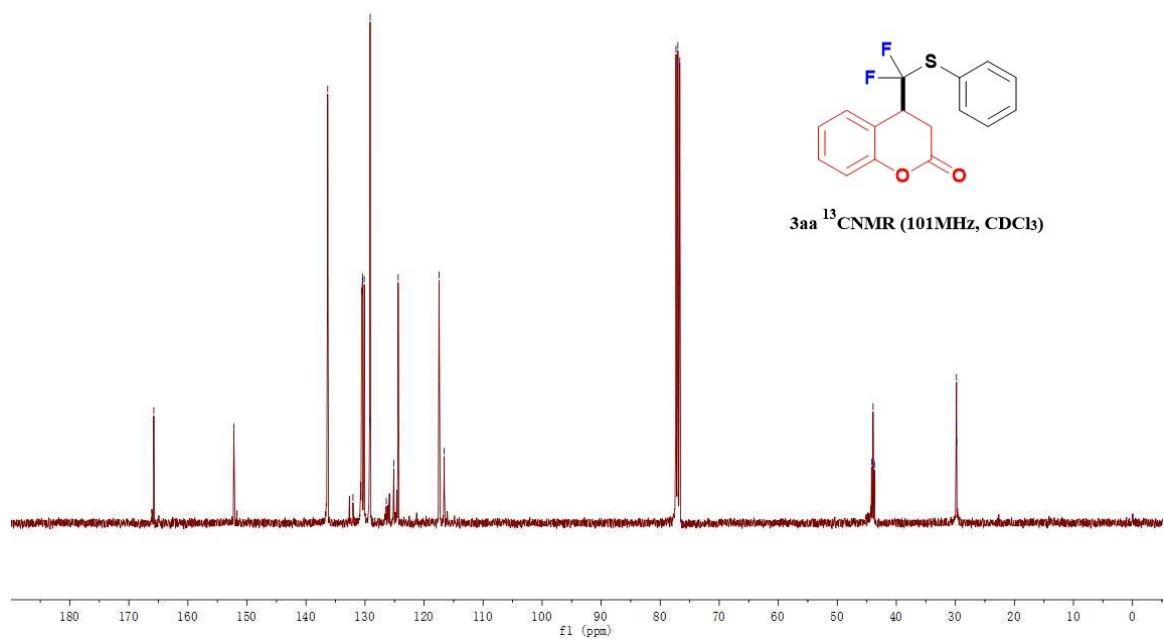

—75.87  
—76.43  
—78.18  
—78.74

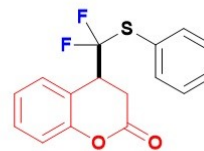

3aa <sup>19</sup>F NMR (376 MHz, CDCl<sub>3</sub>)

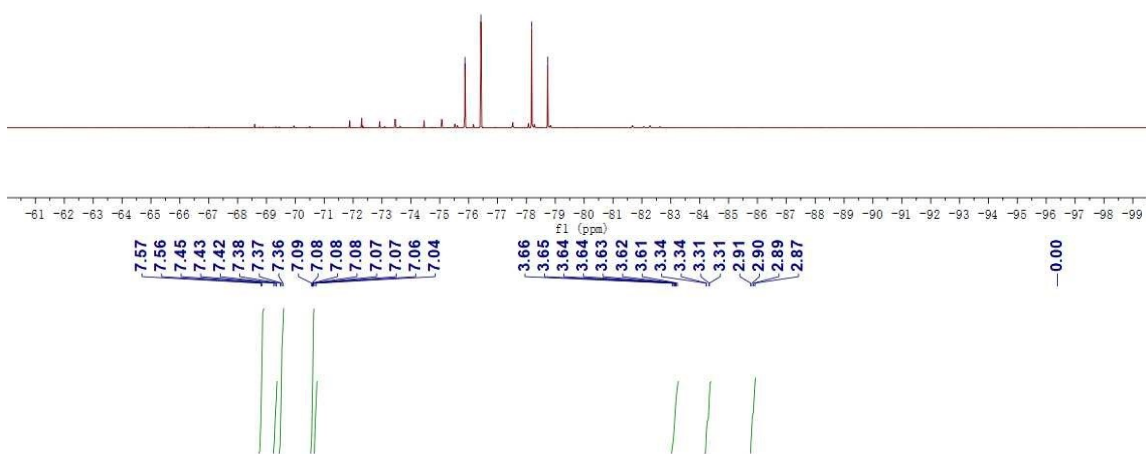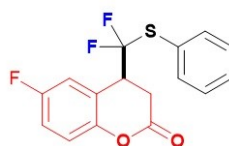

3ba <sup>1</sup>H NMR (600MHz, CDCl<sub>3</sub>)

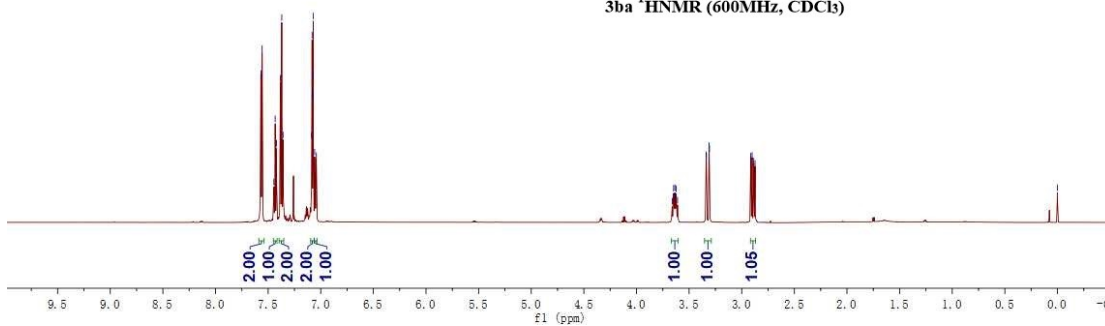

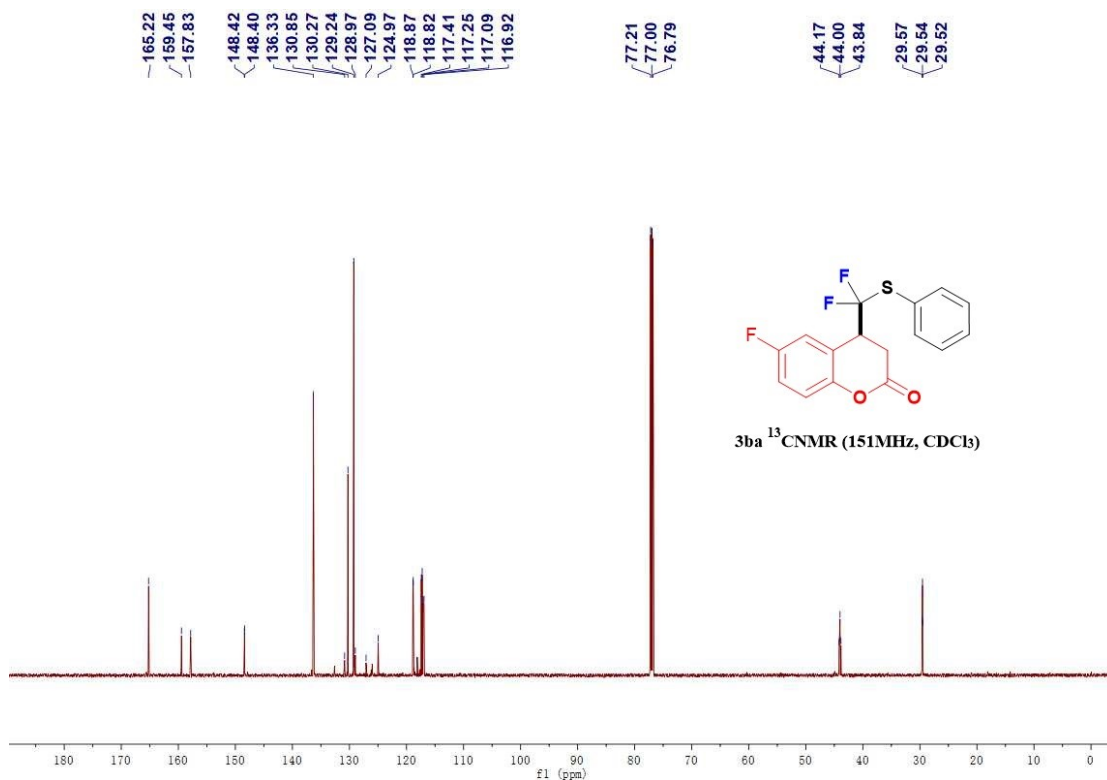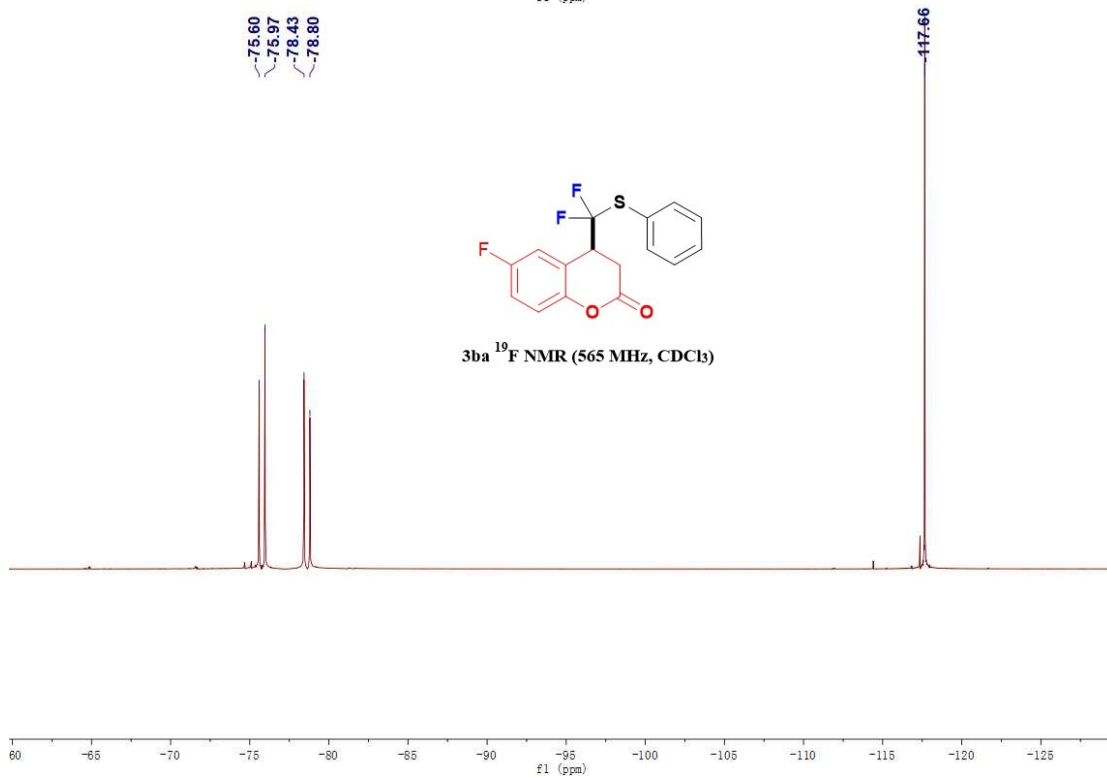

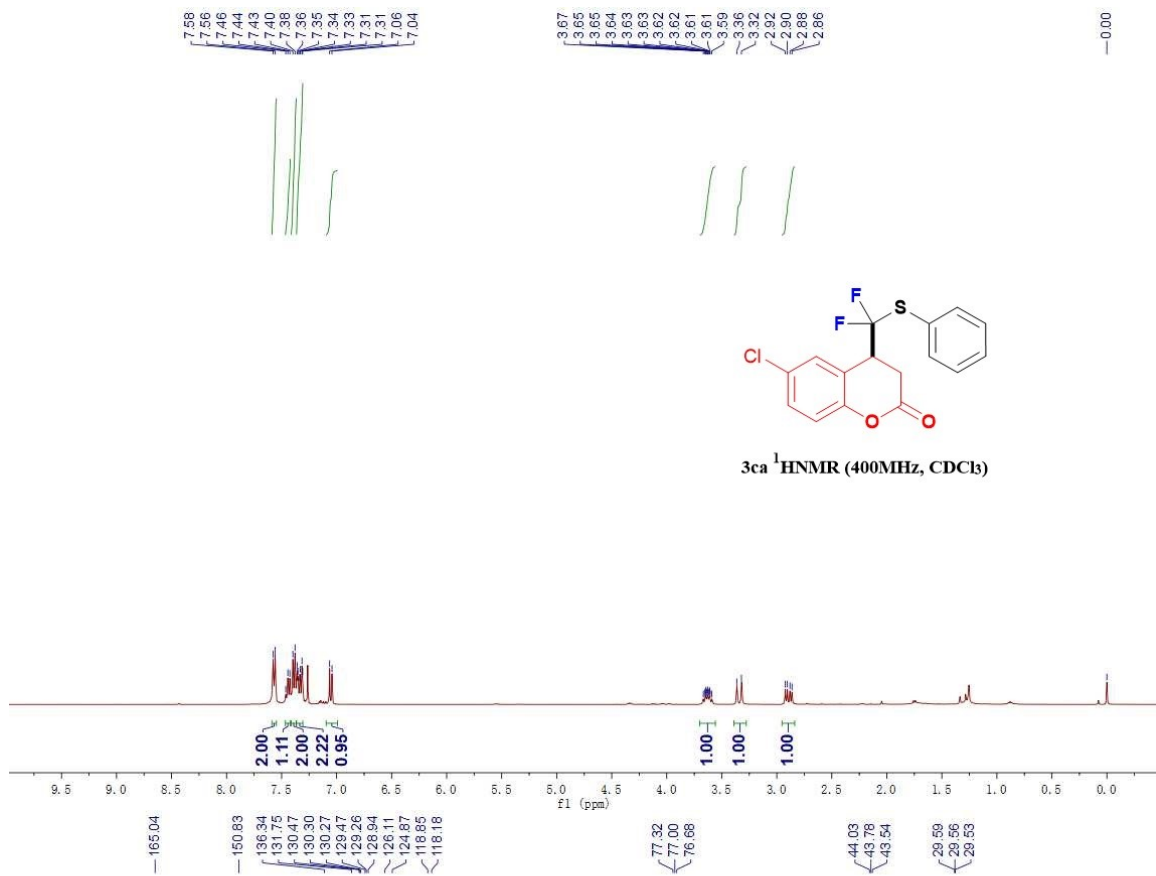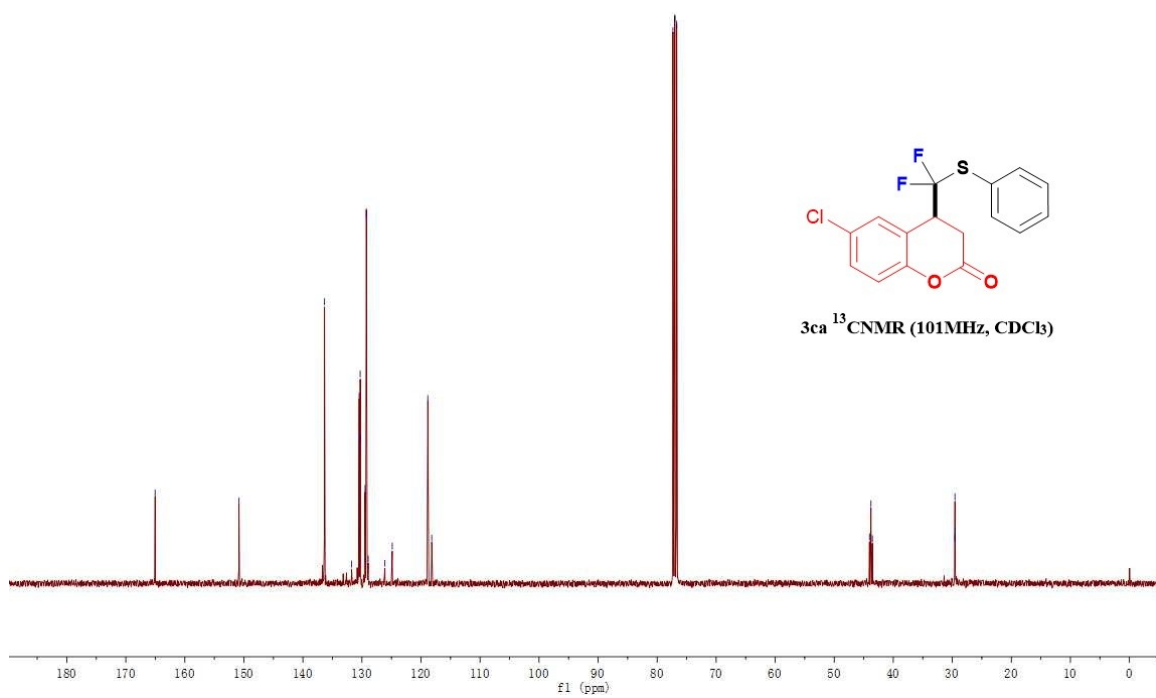

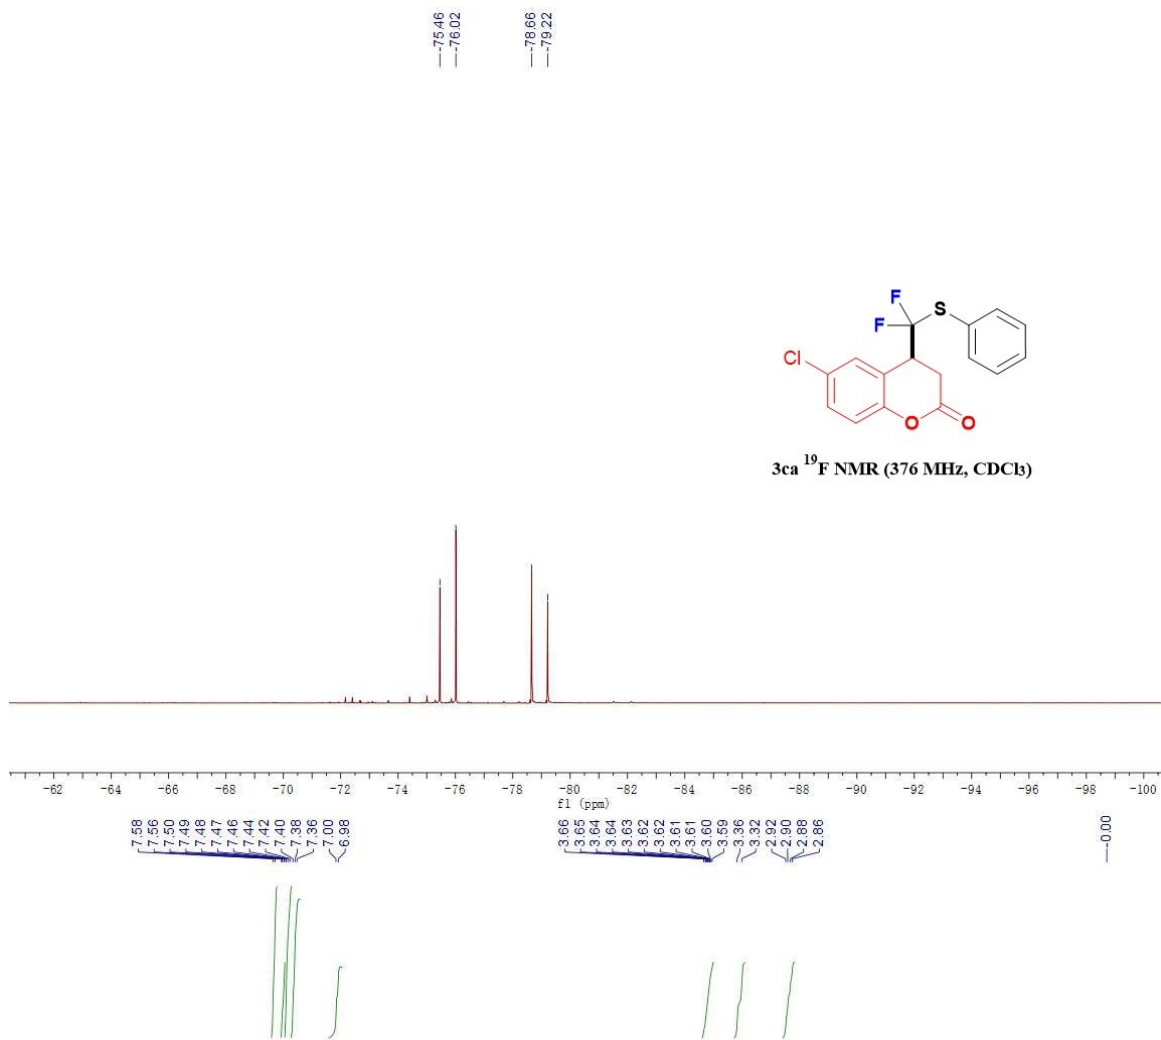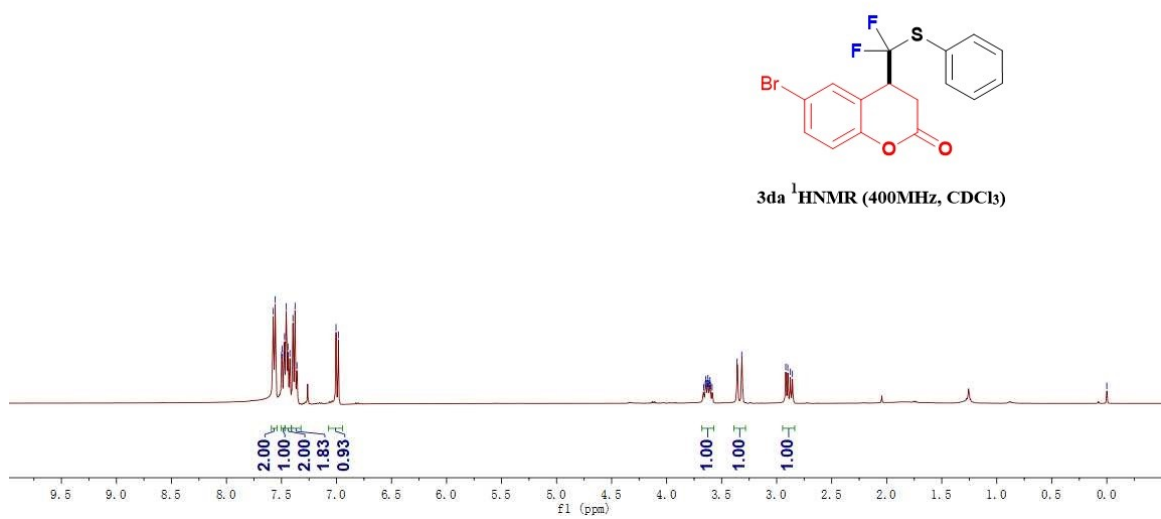

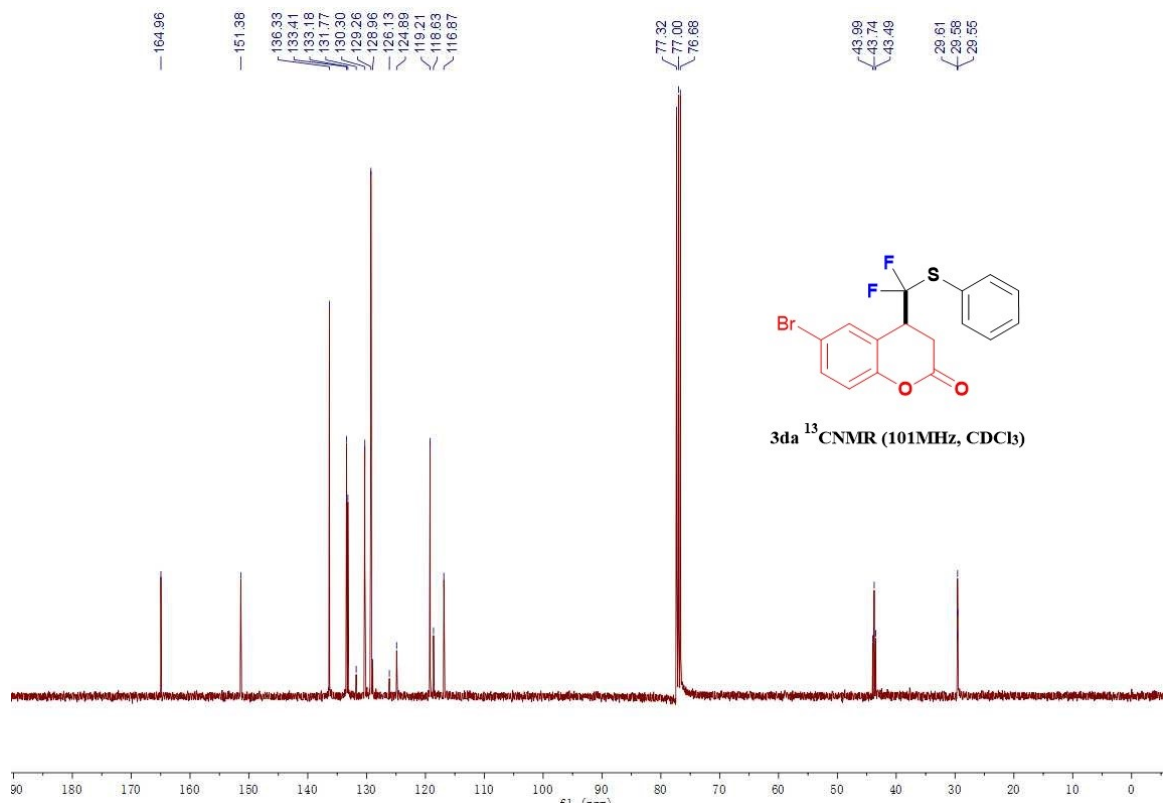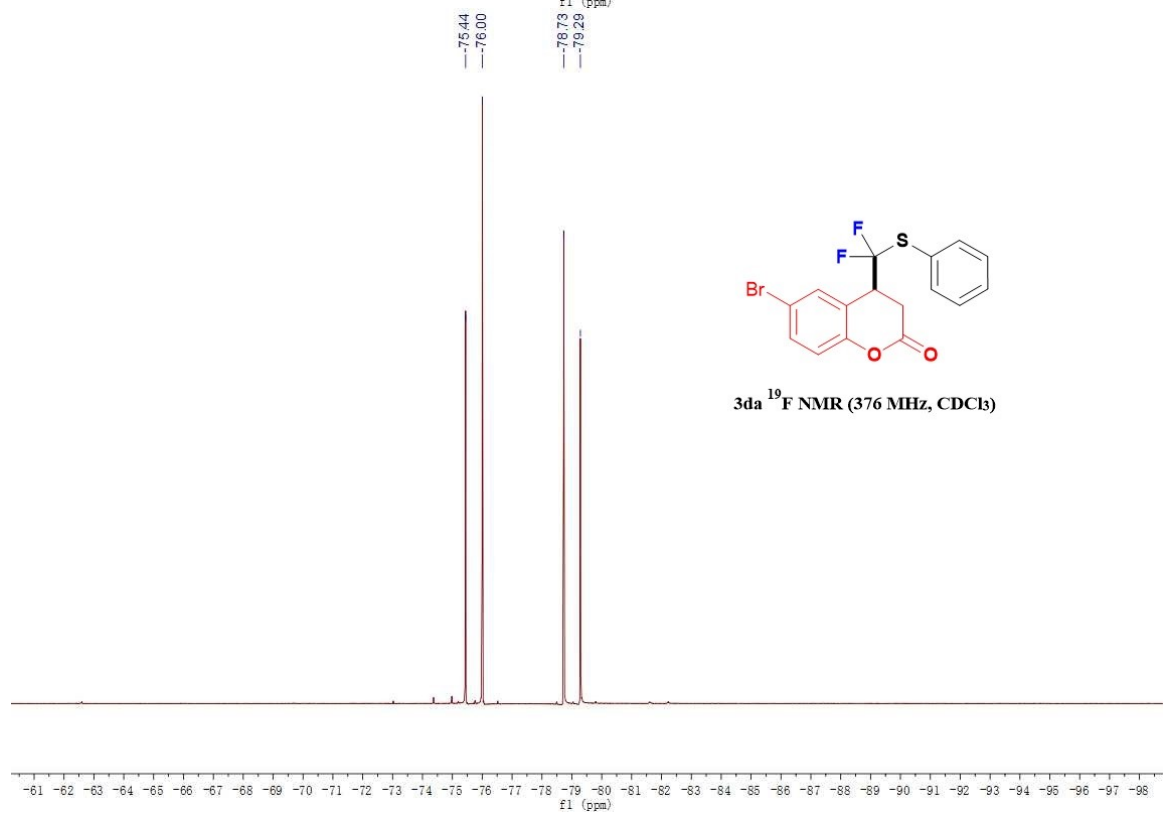

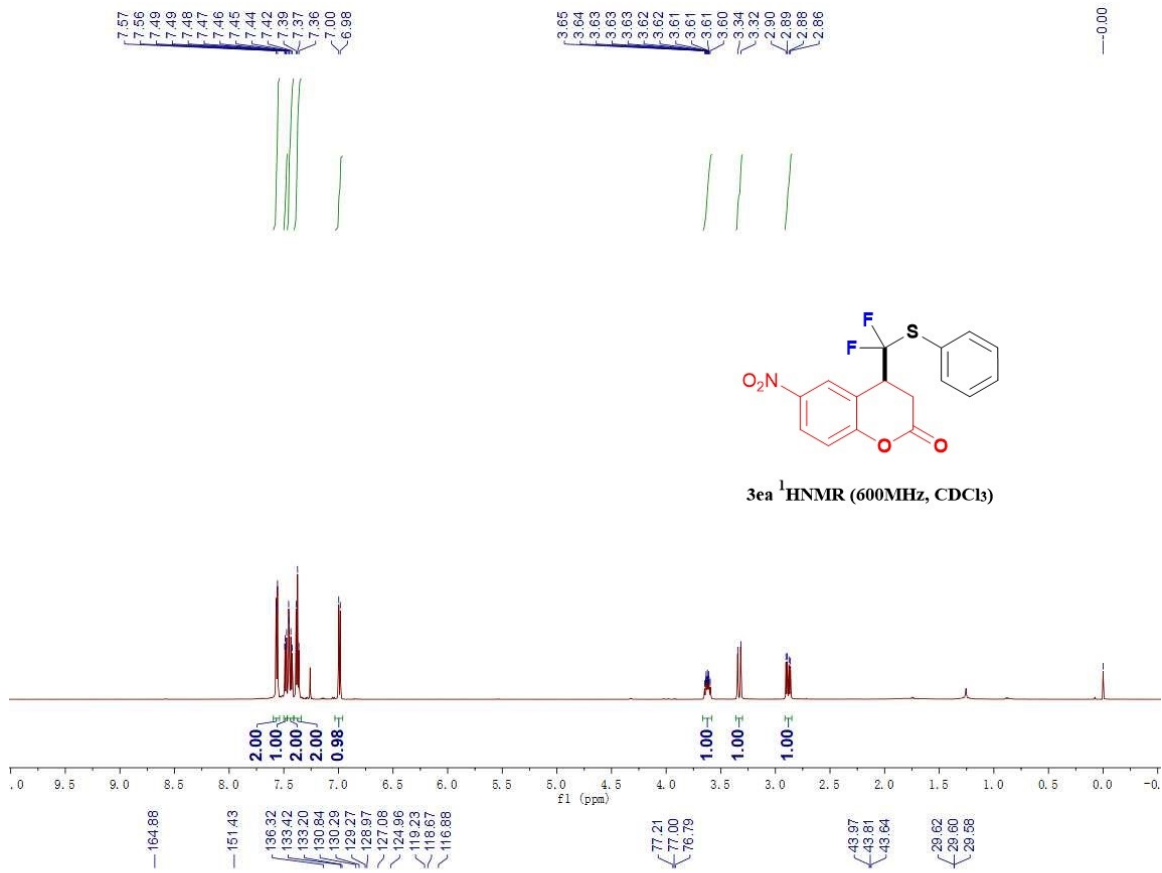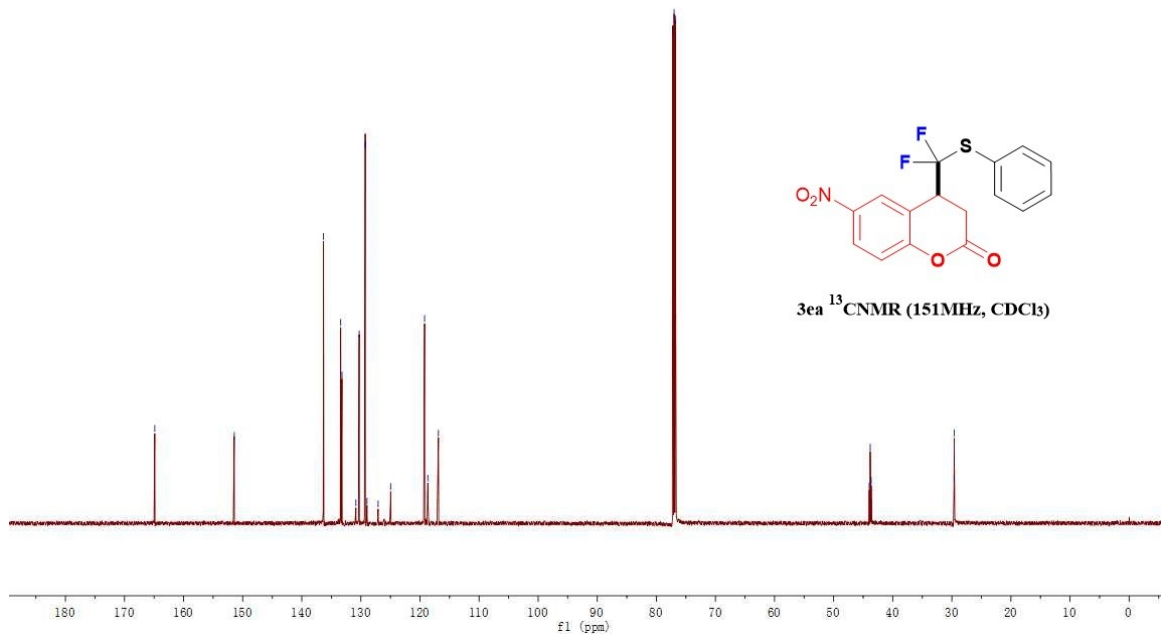



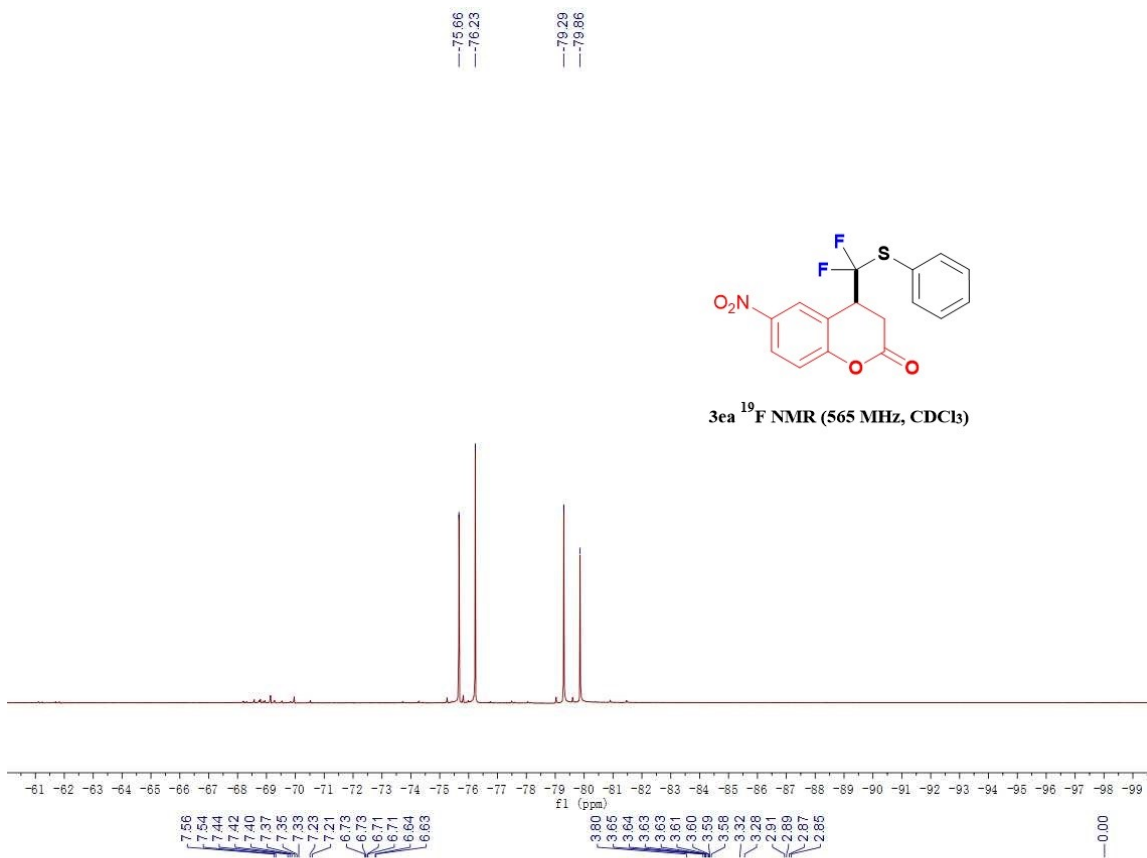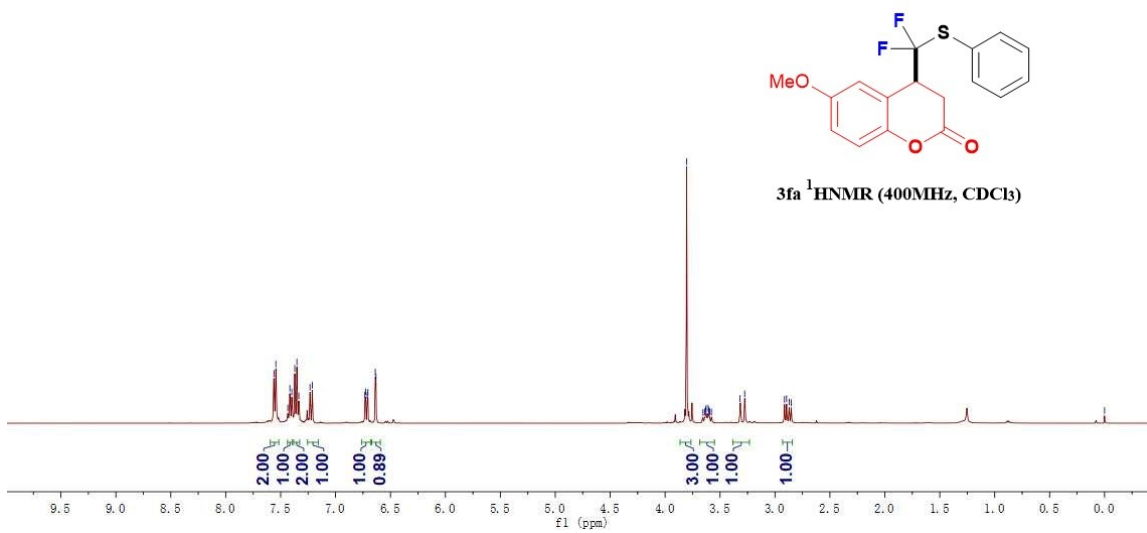

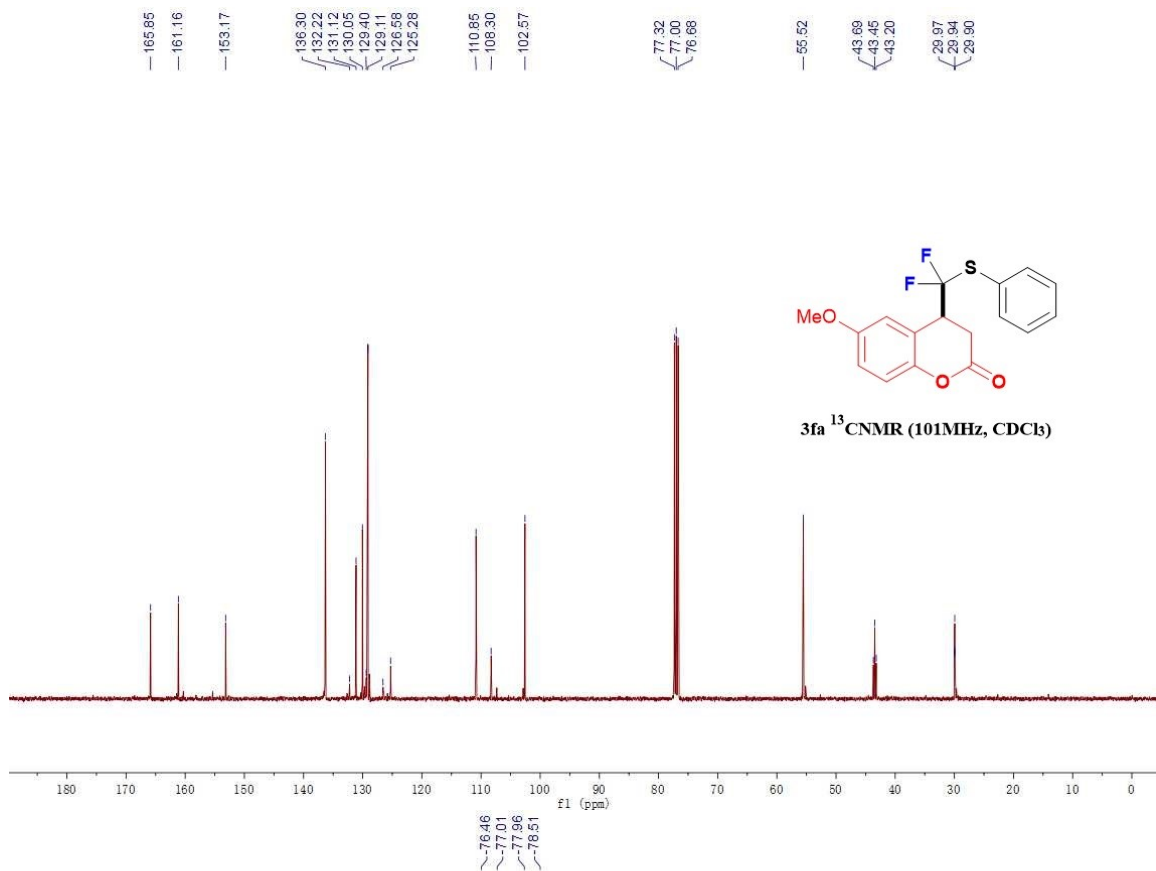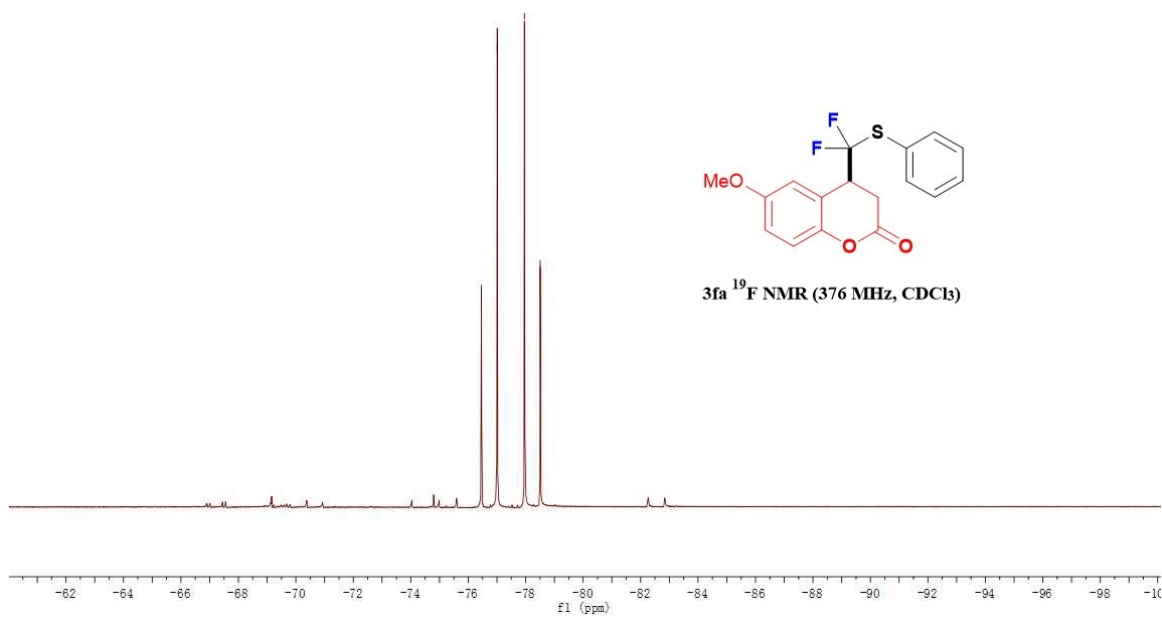

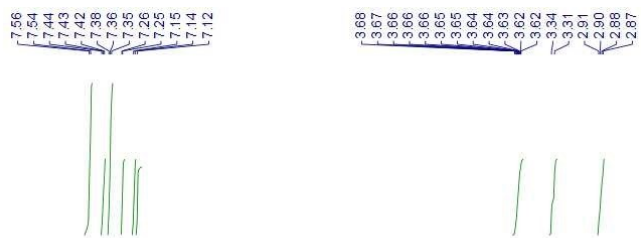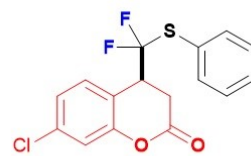

3ga  $^1\text{H}$ NMR (600MHz,  $\text{CDCl}_3$ )

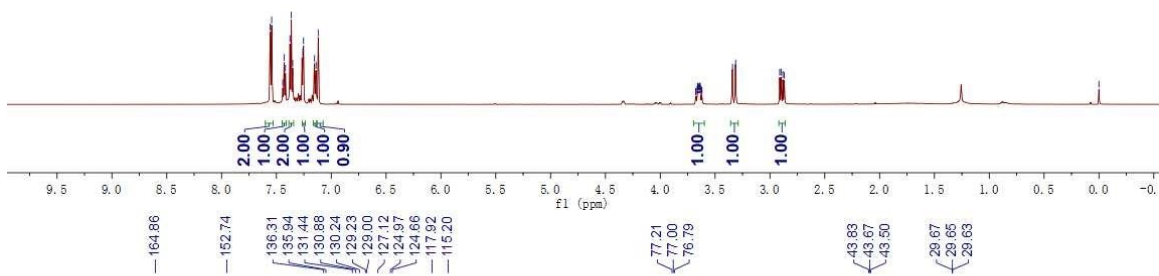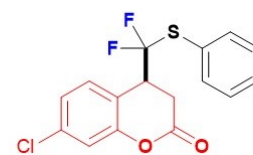

3ga  $^{13}\text{C}$ NMR (151MHz,  $\text{CDCl}_3$ )

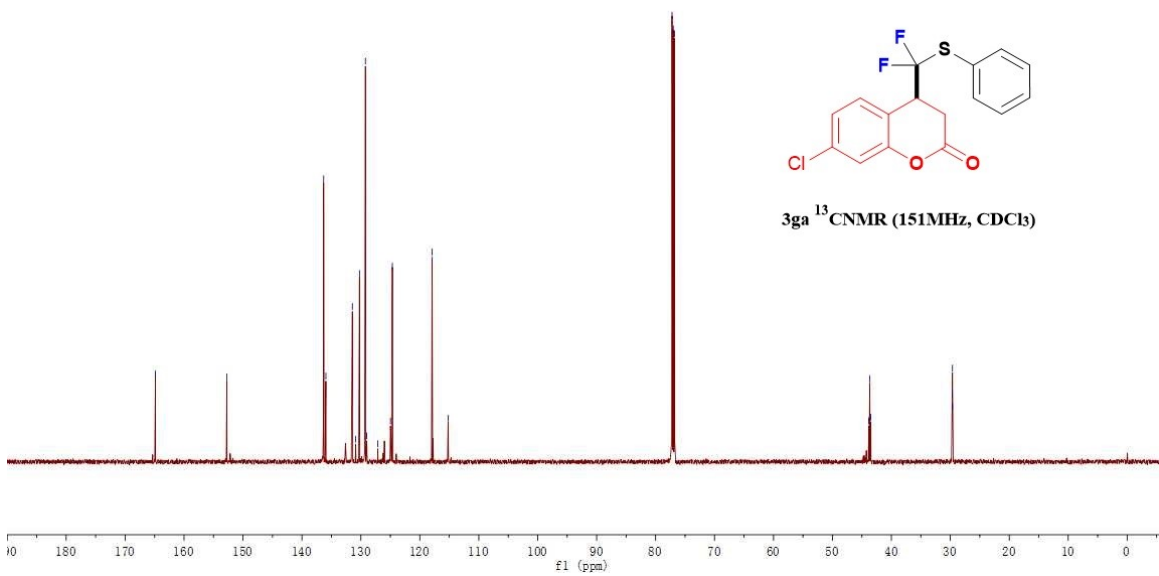

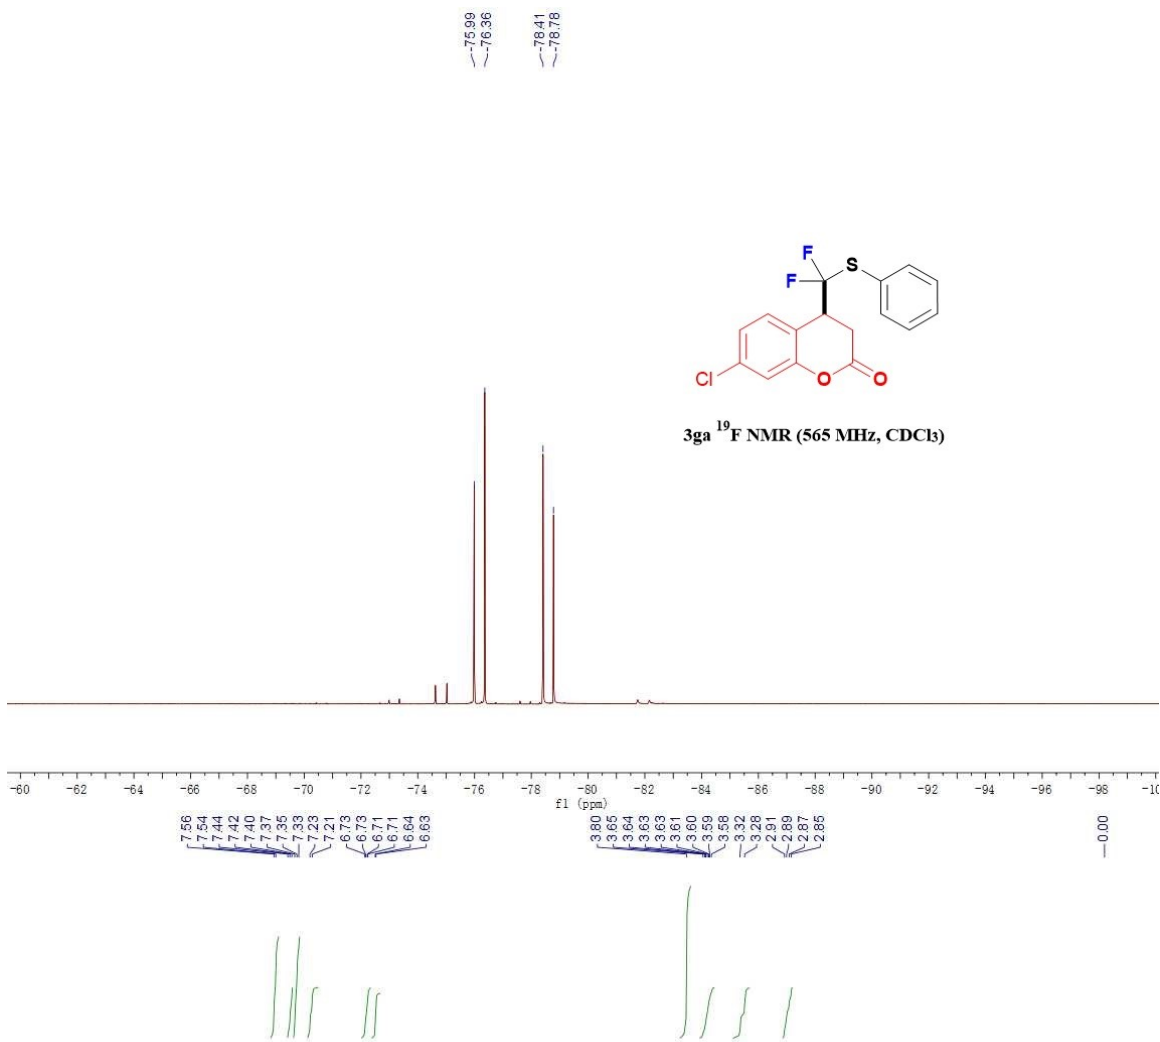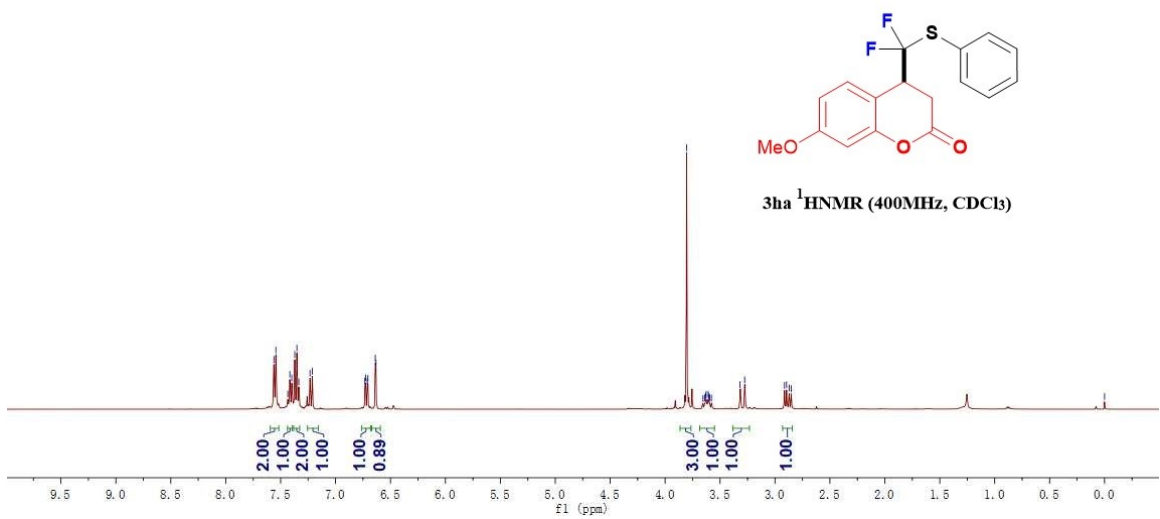

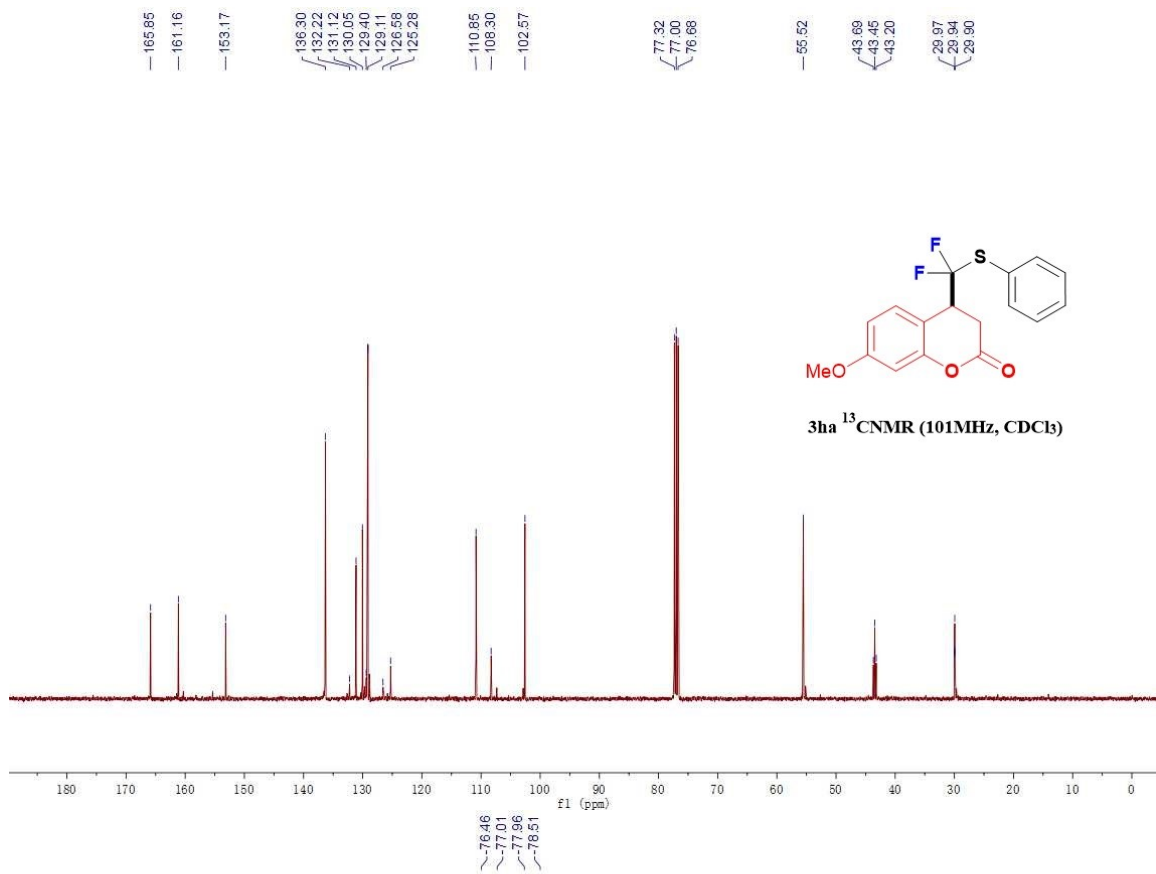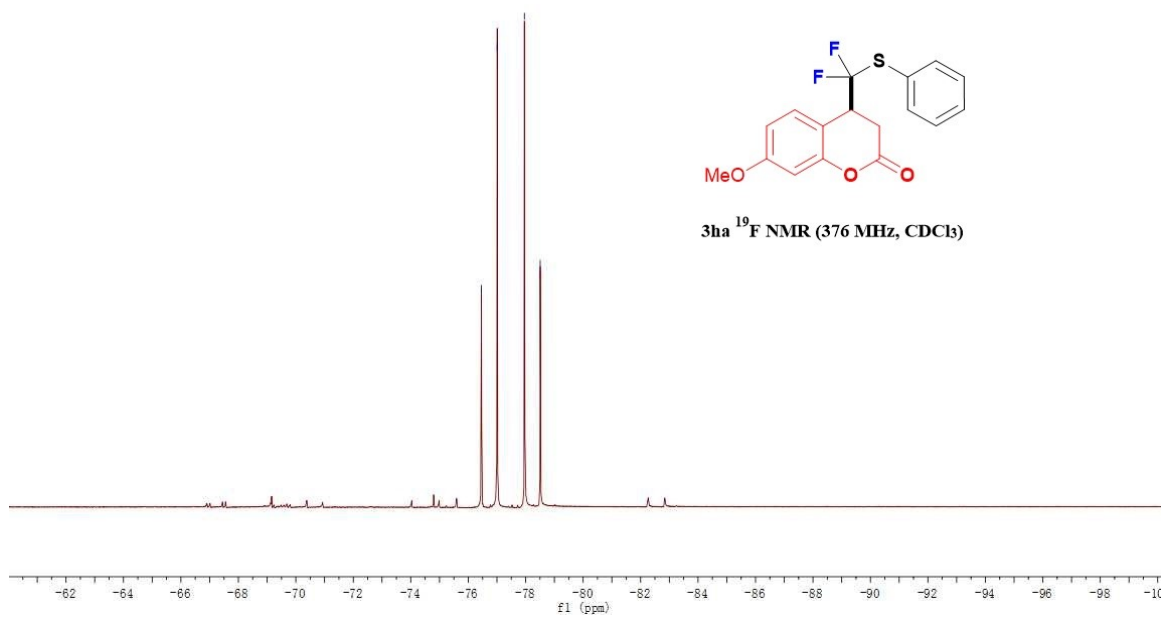

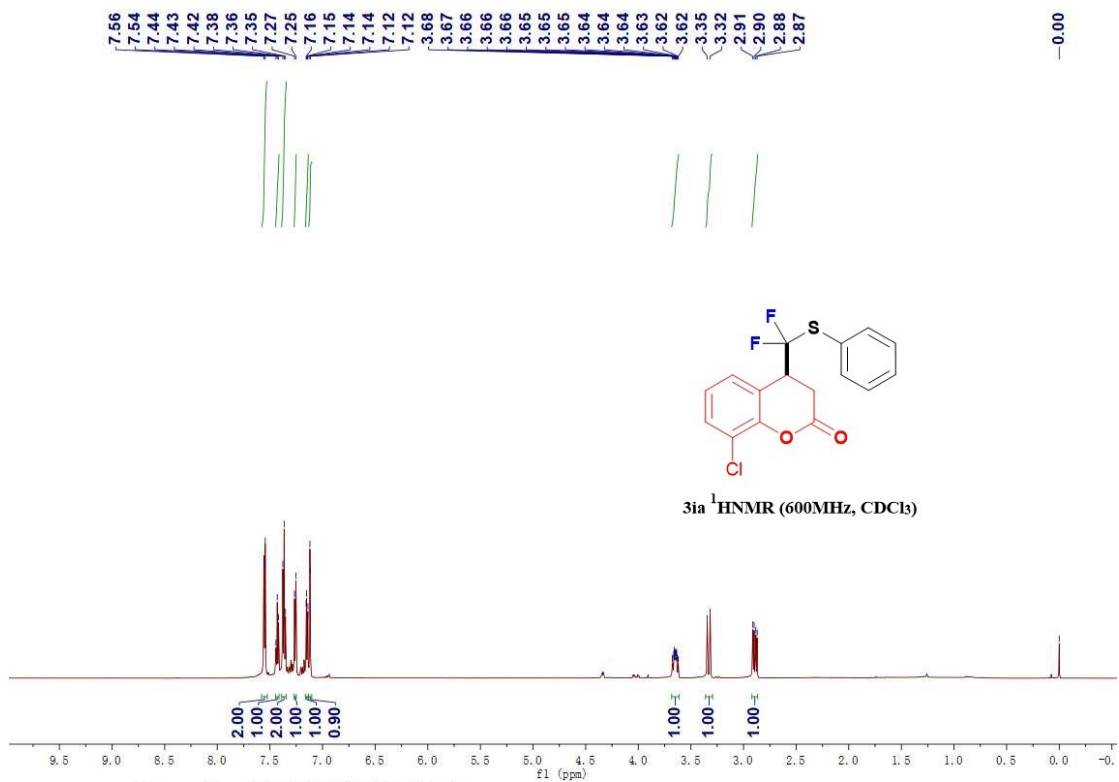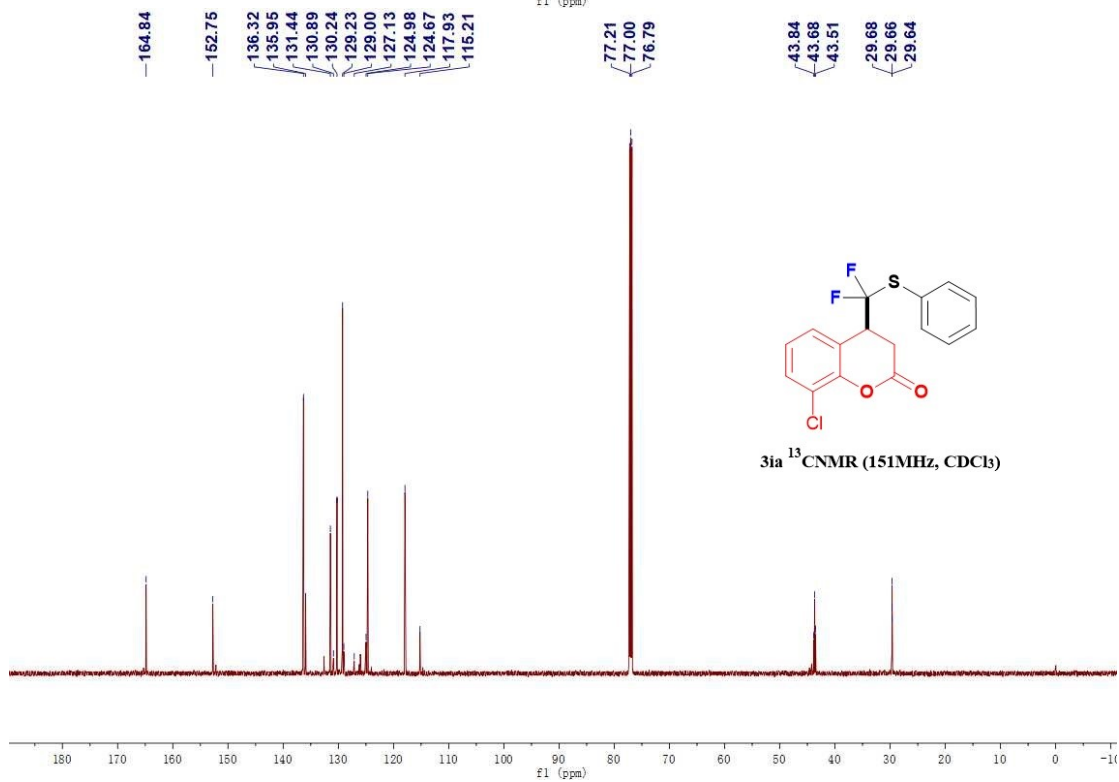

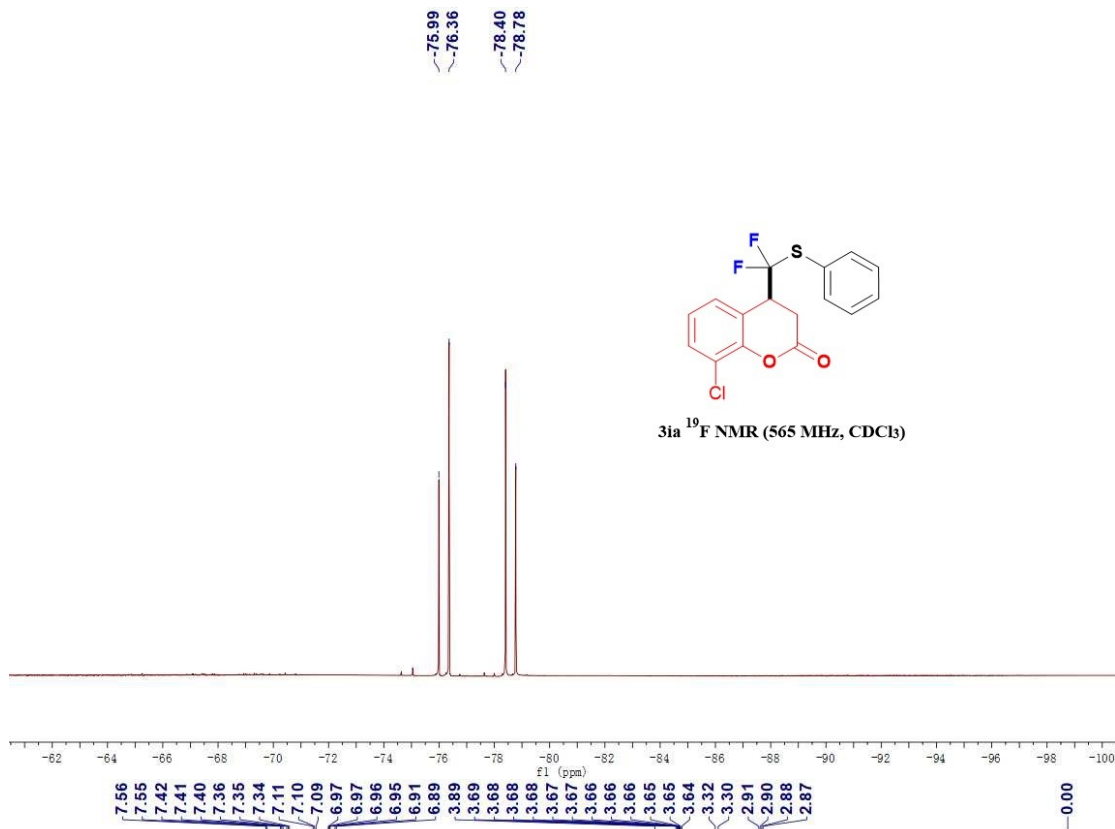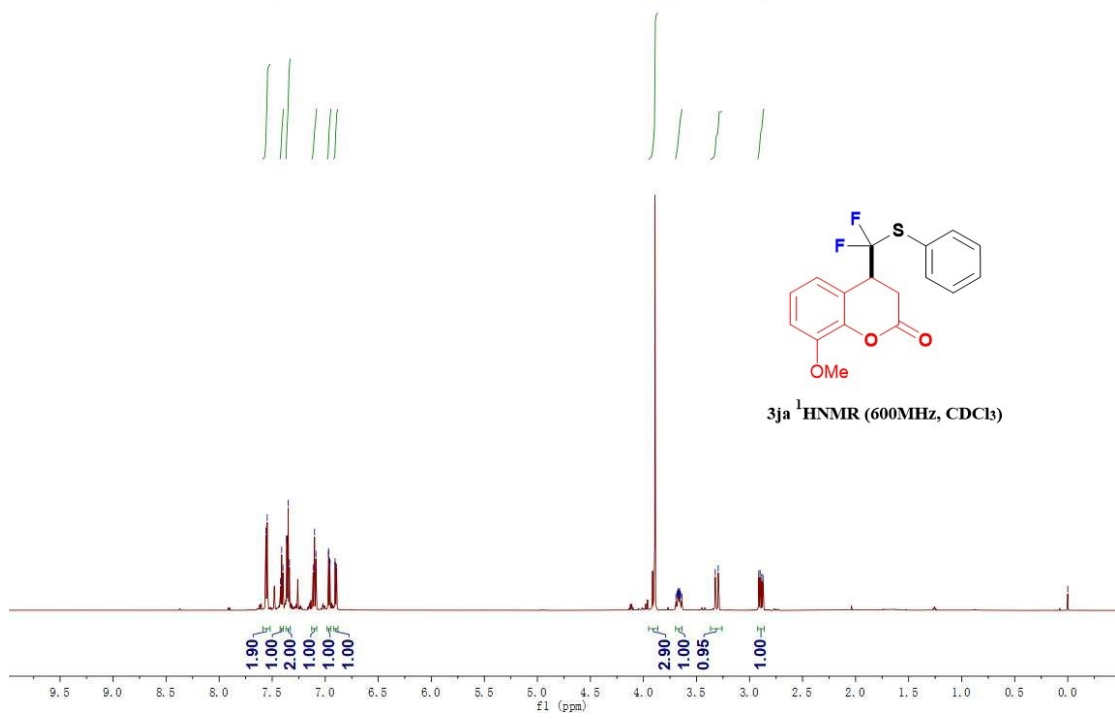

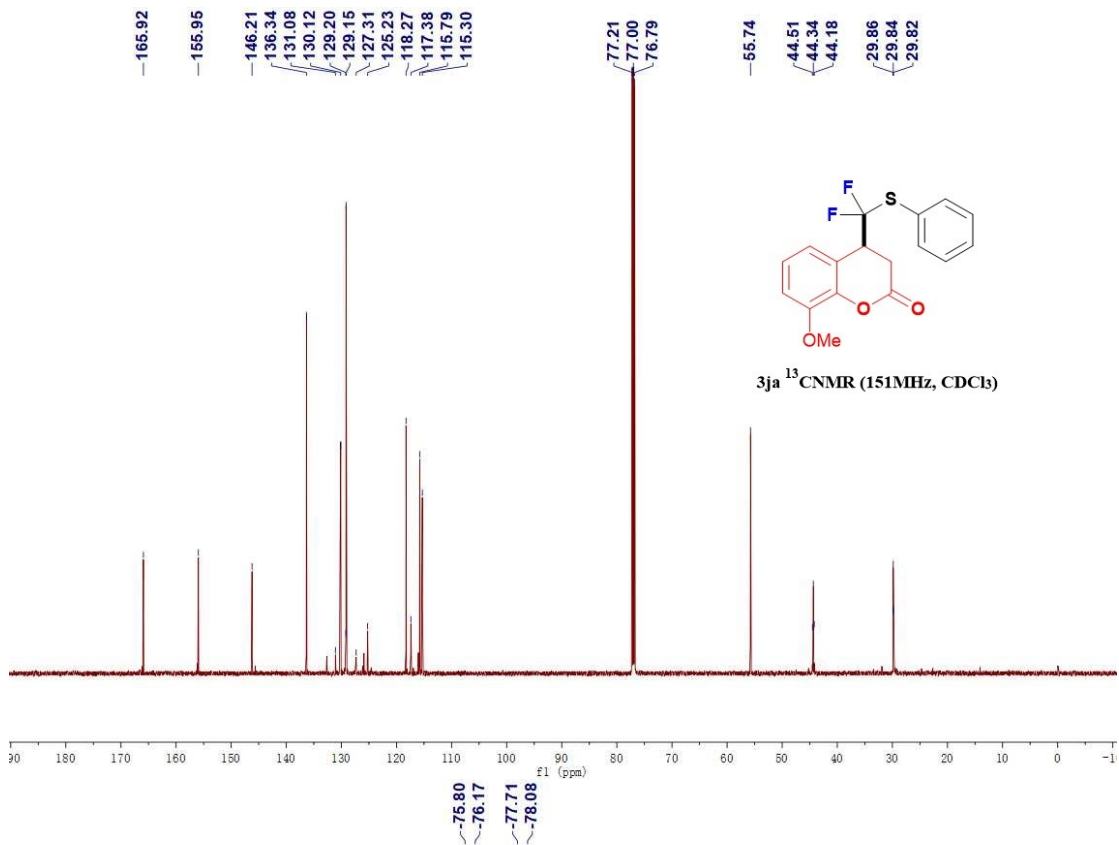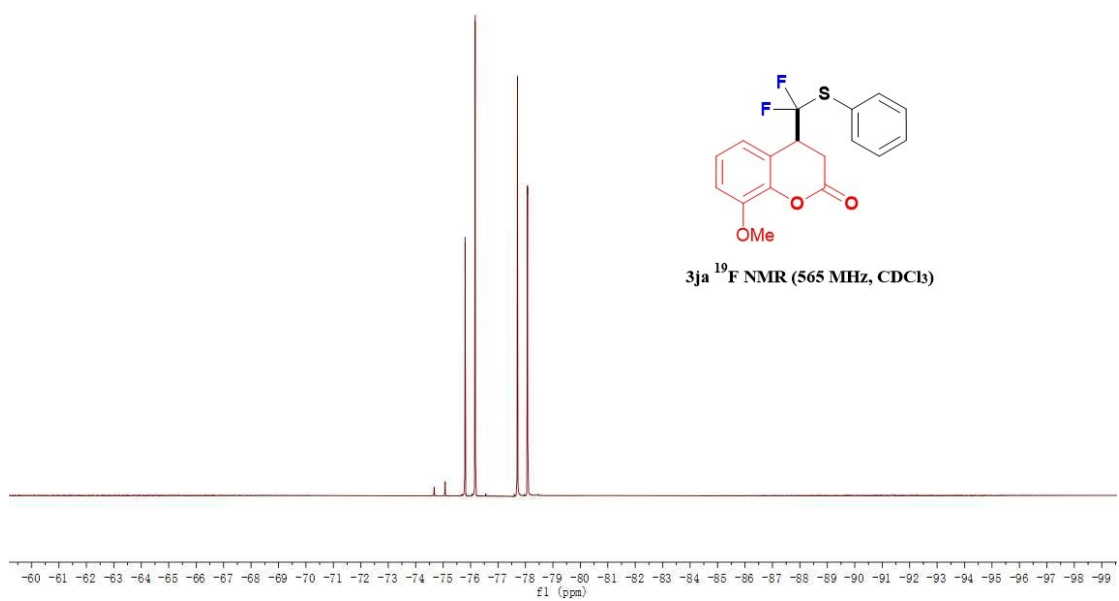



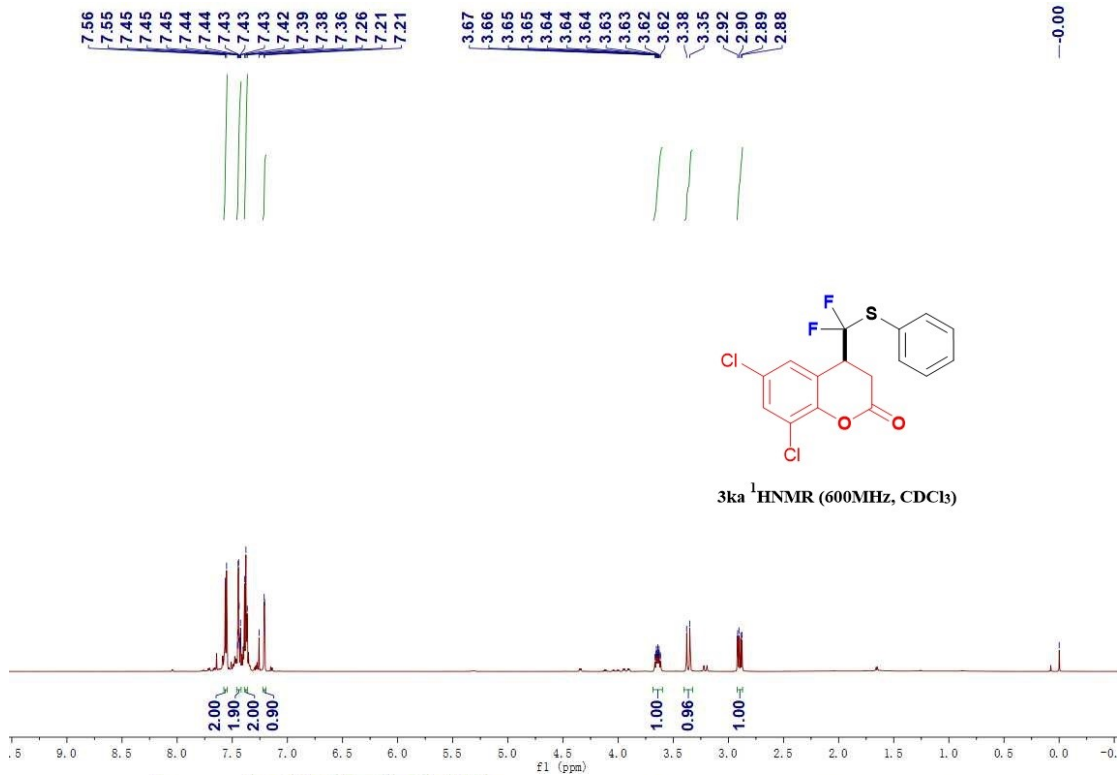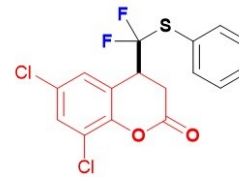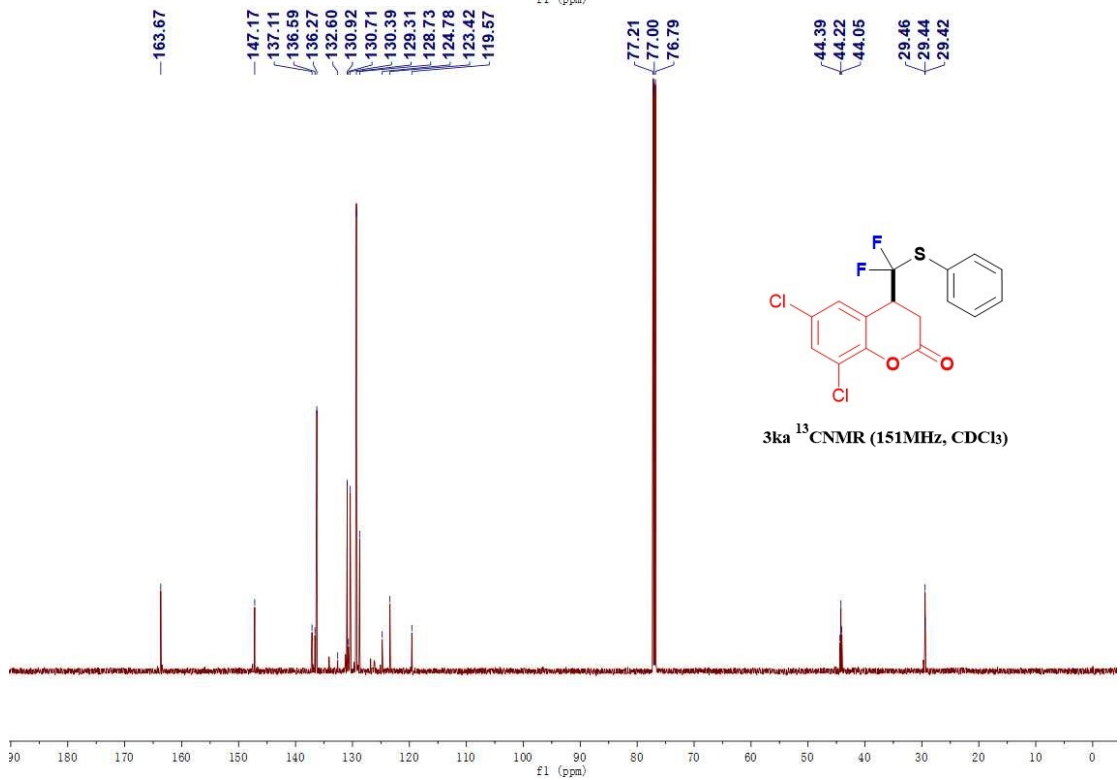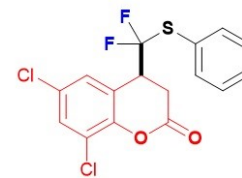

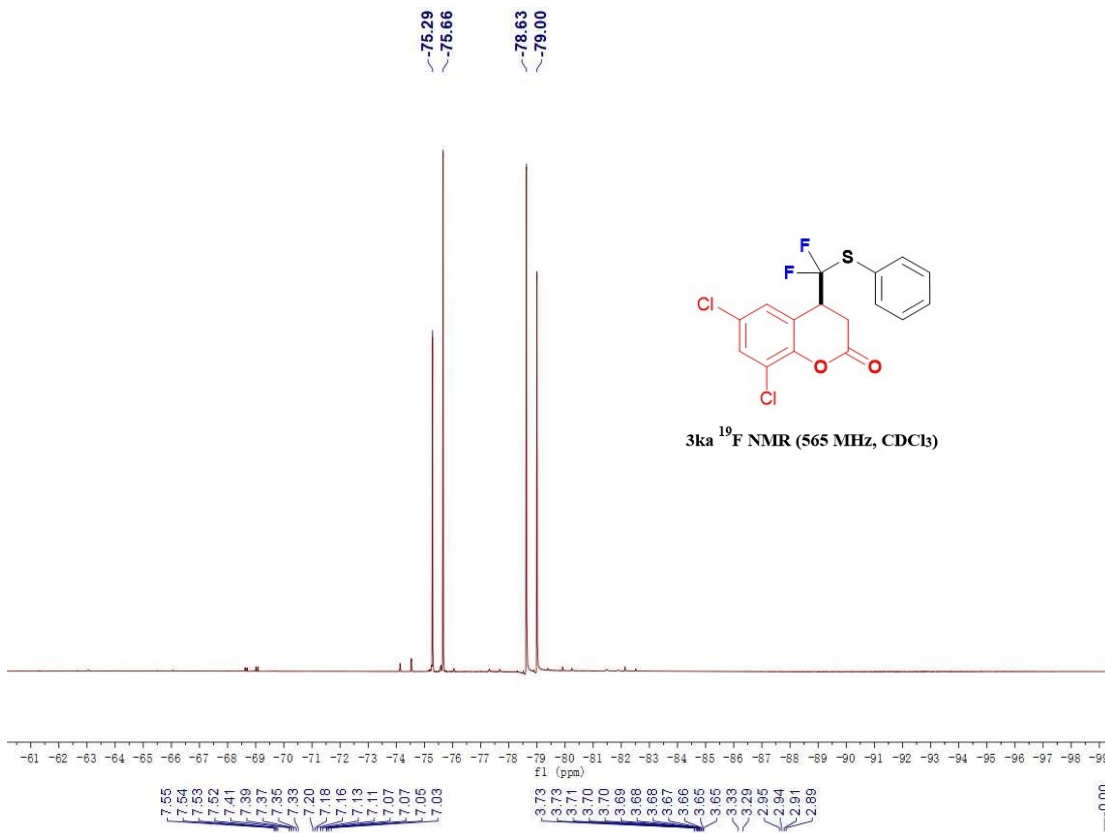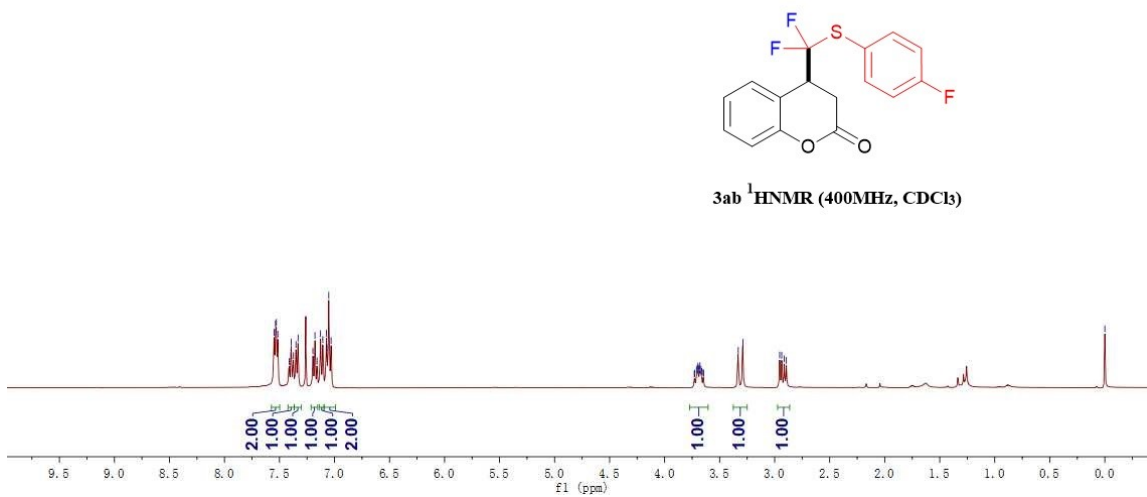

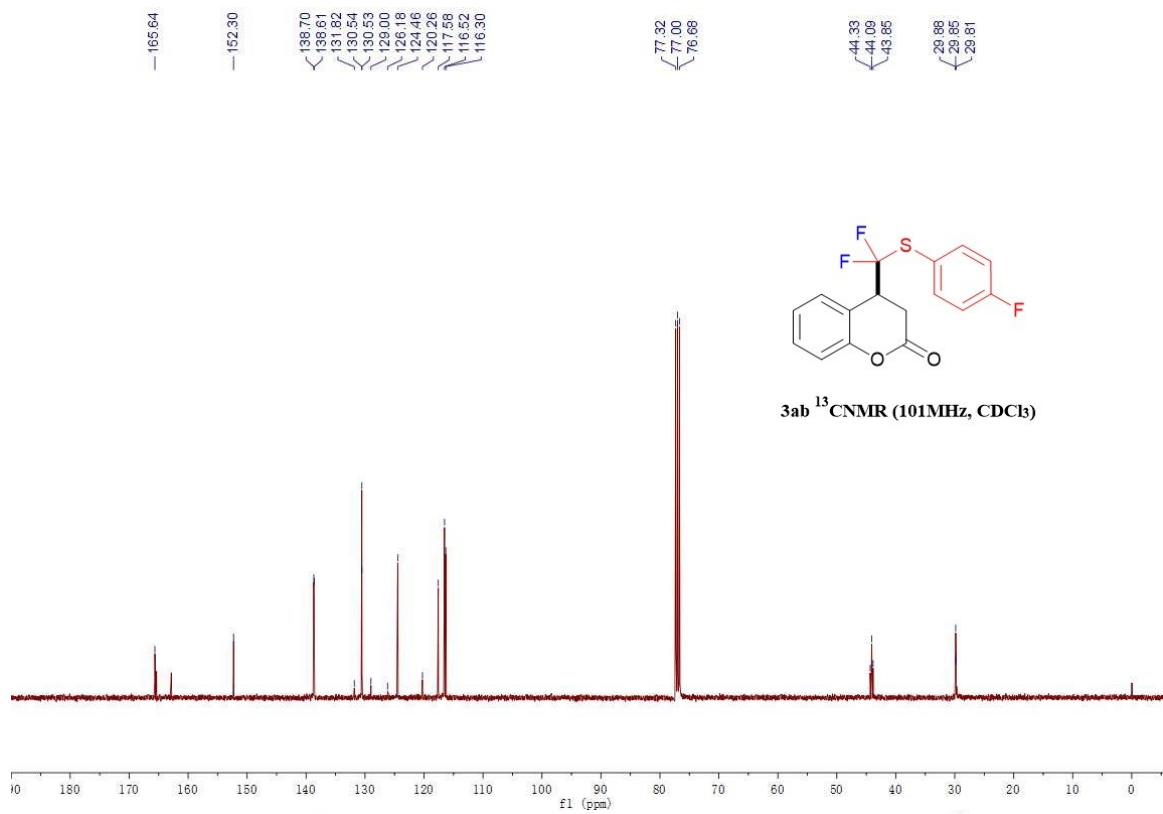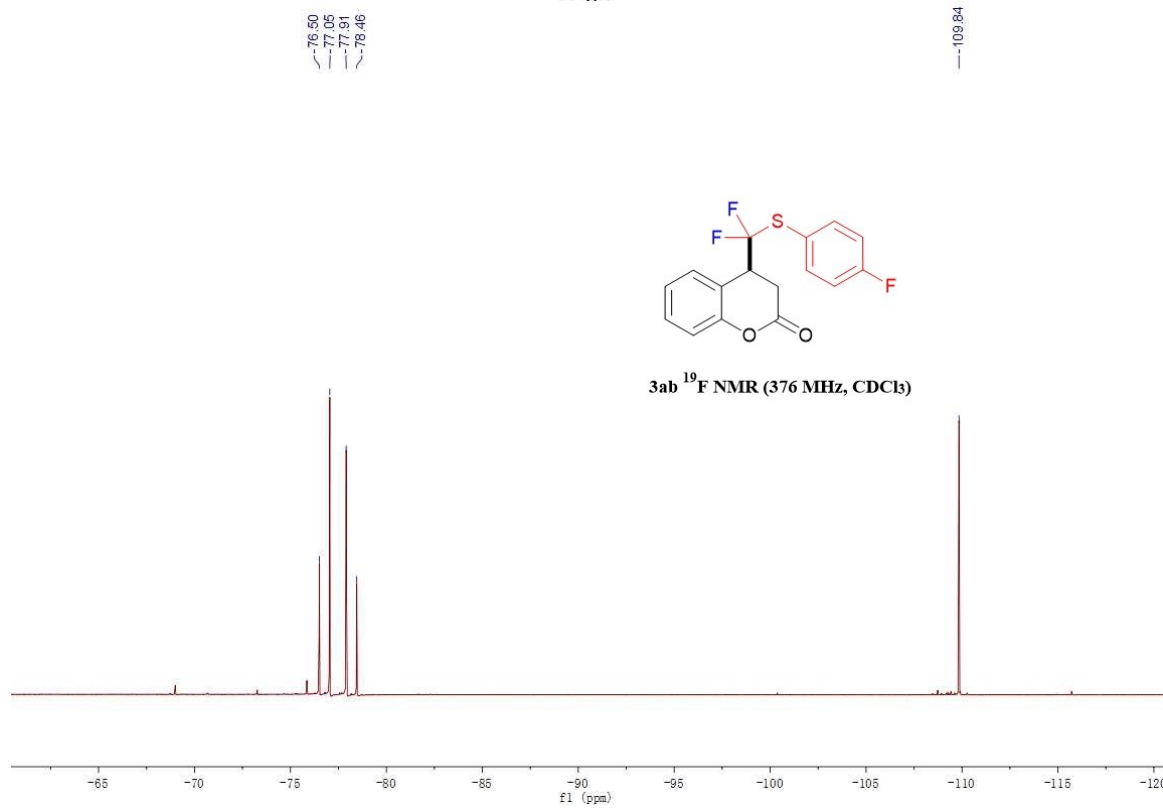



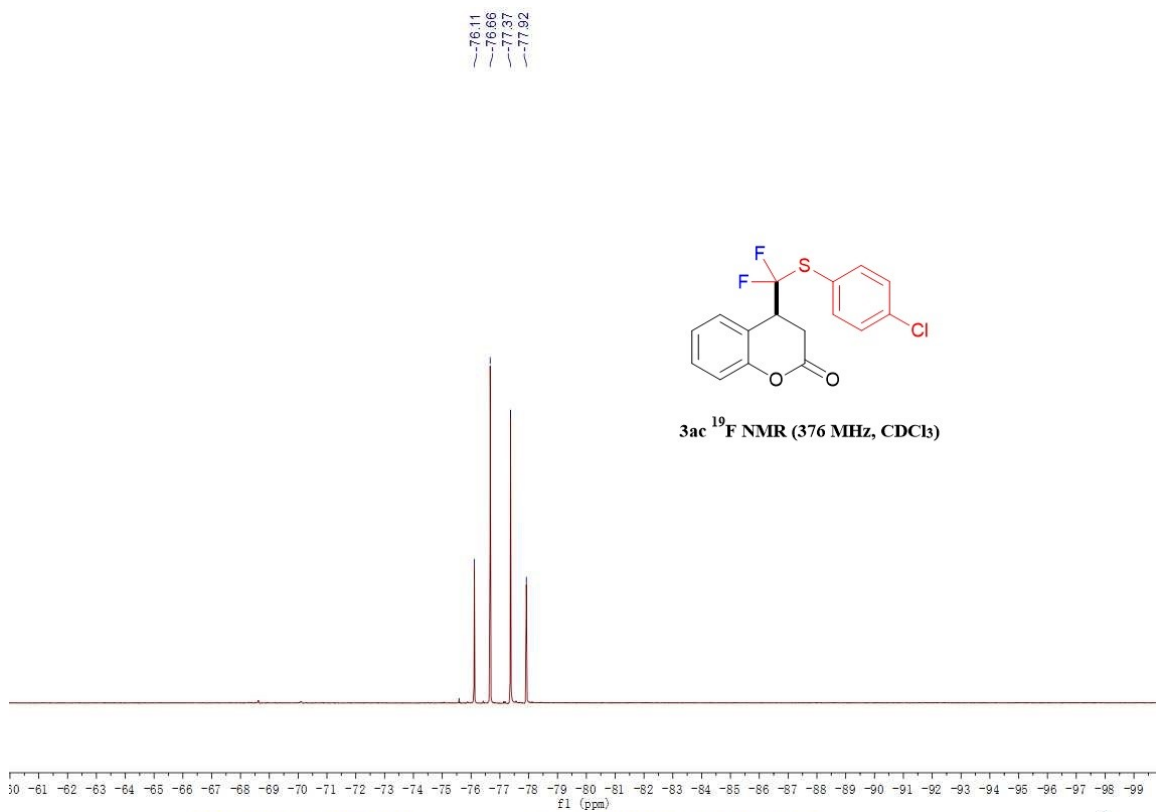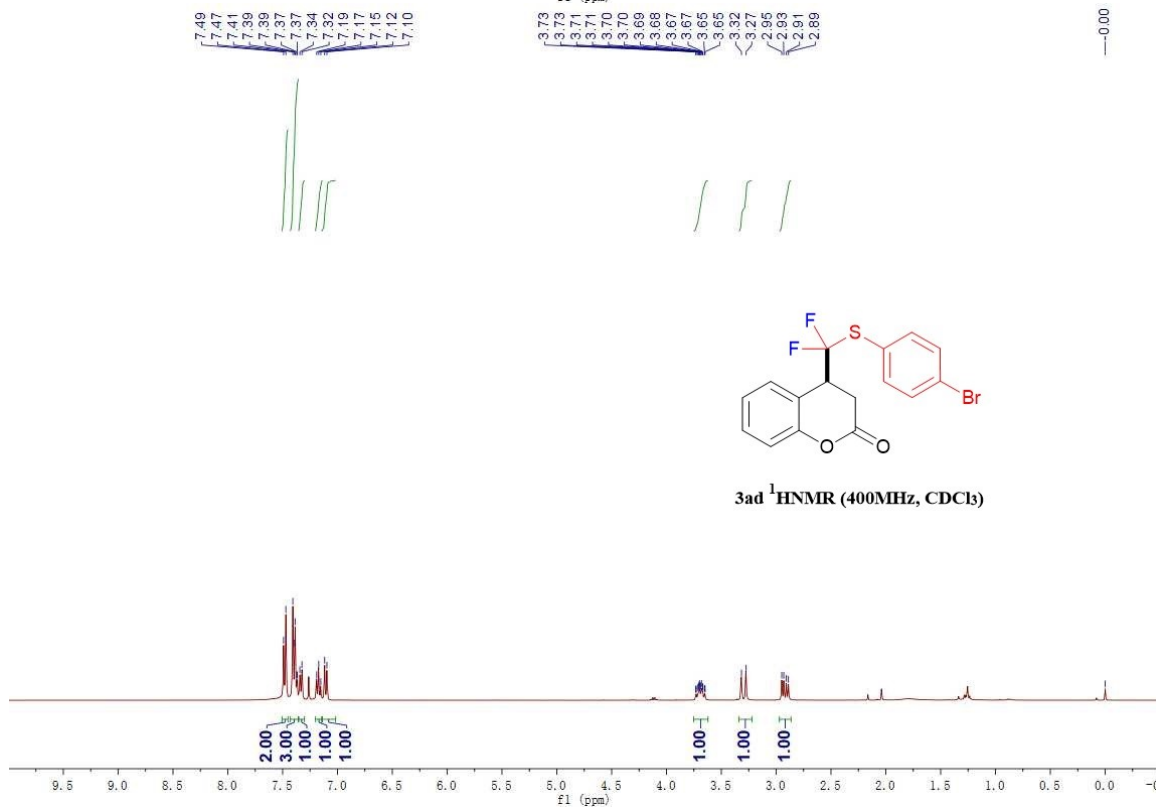

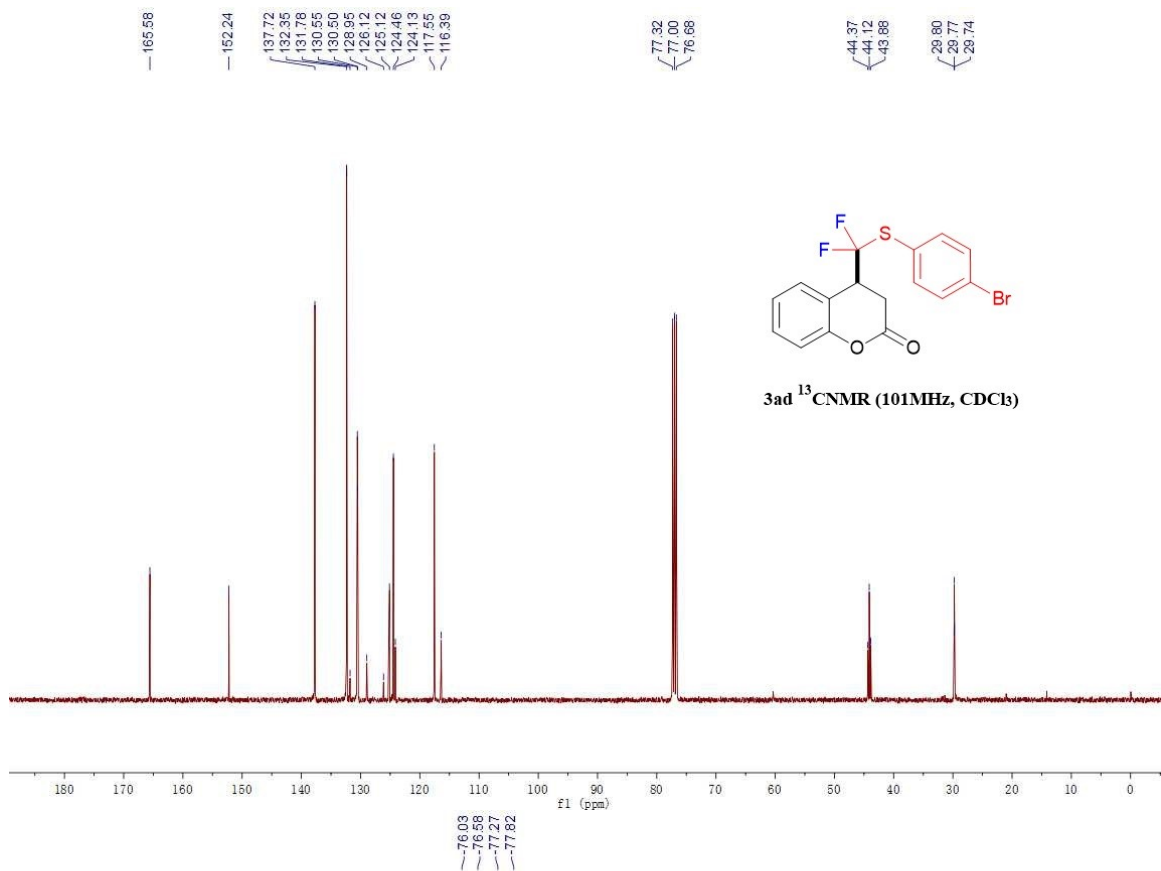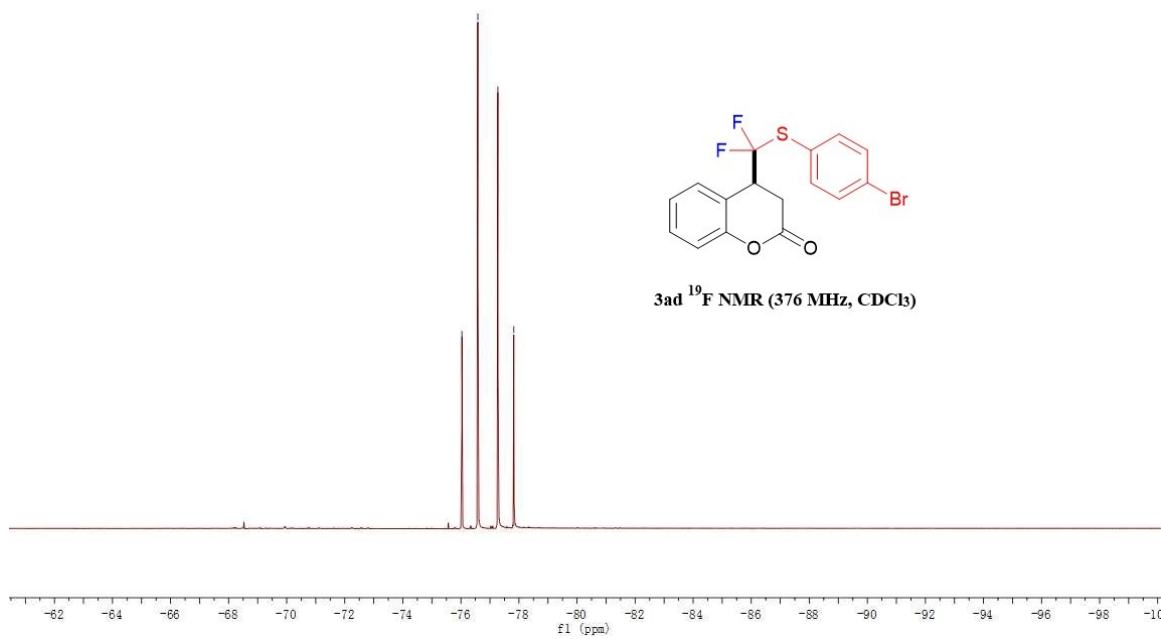

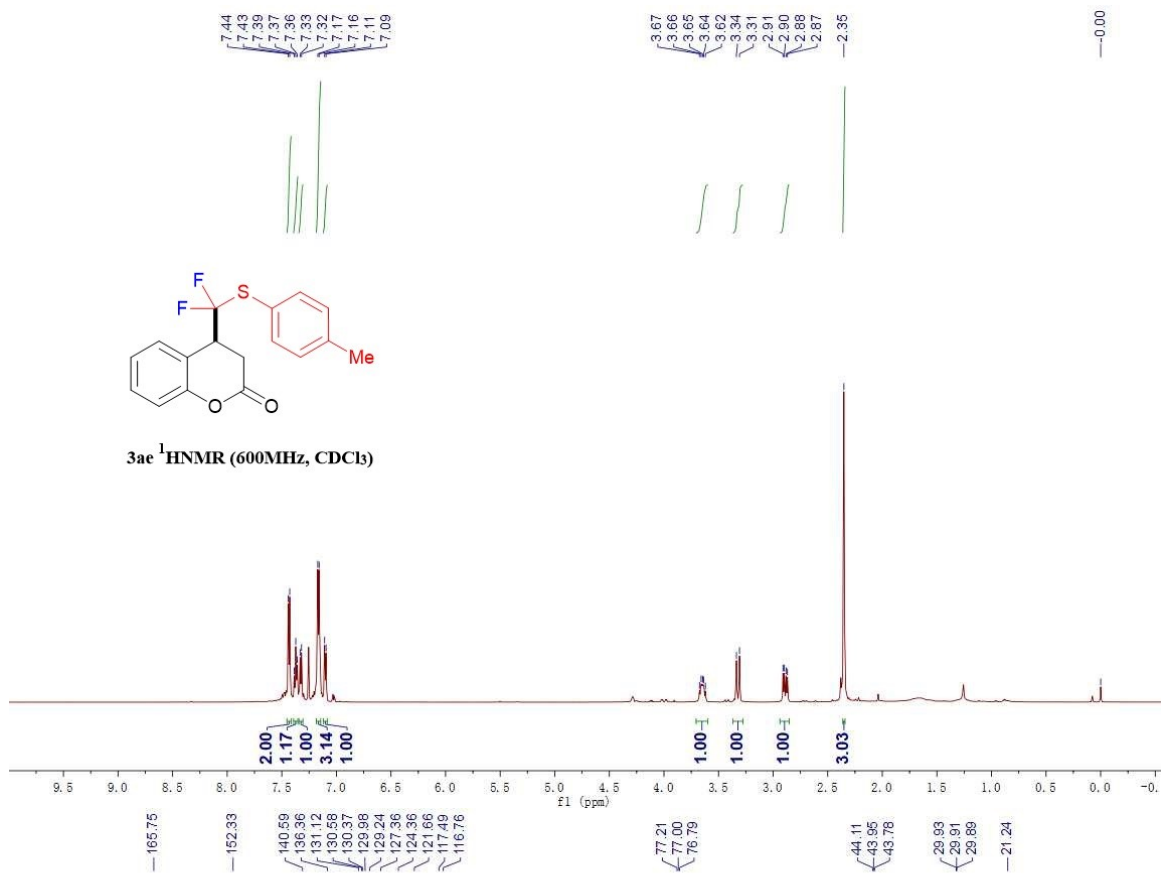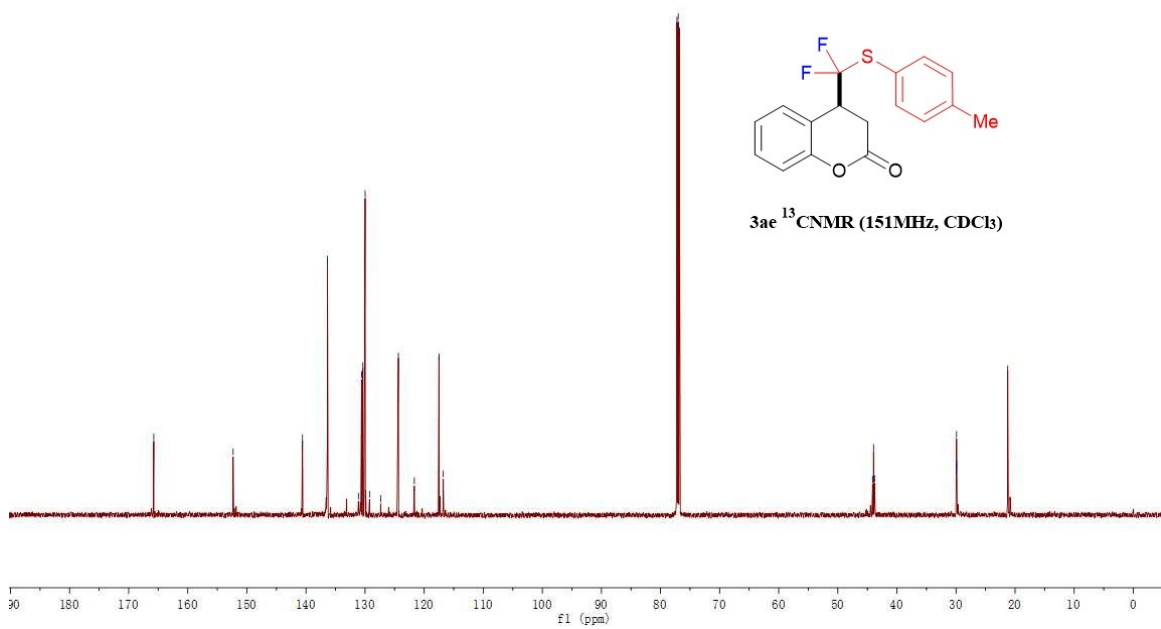

~76.20  
~76.57  
~78.78  
~79.15

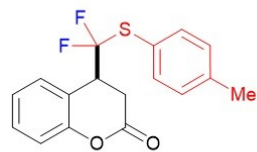

3ae <sup>19</sup>F NMR (565 MHz, CDCl<sub>3</sub>)

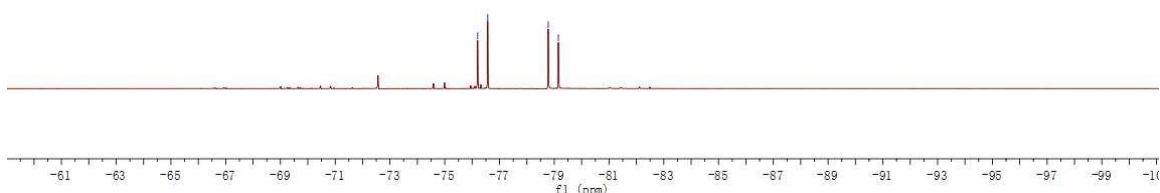

7.48  
7.46  
7.40  
7.38  
7.36  
7.34  
7.32  
7.18  
7.16  
7.15  
7.12  
7.10  
6.89  
6.87

3.81  
3.80  
3.80  
3.69  
3.67  
3.65  
3.63  
3.61  
3.35  
3.31  
2.93  
2.91  
2.89  
2.87

0.00

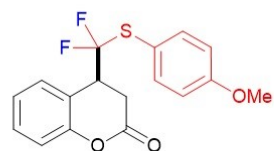

3af <sup>1</sup>H NMR (400 MHz, CDCl<sub>3</sub>)

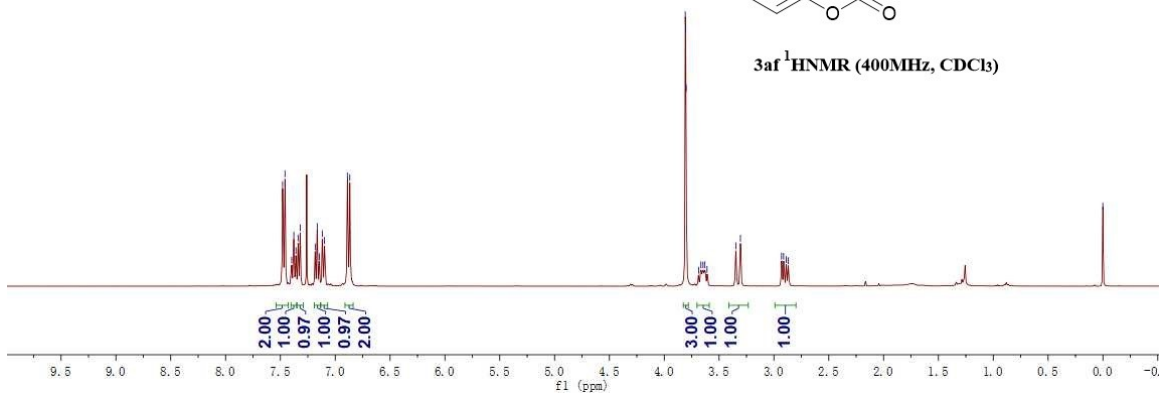



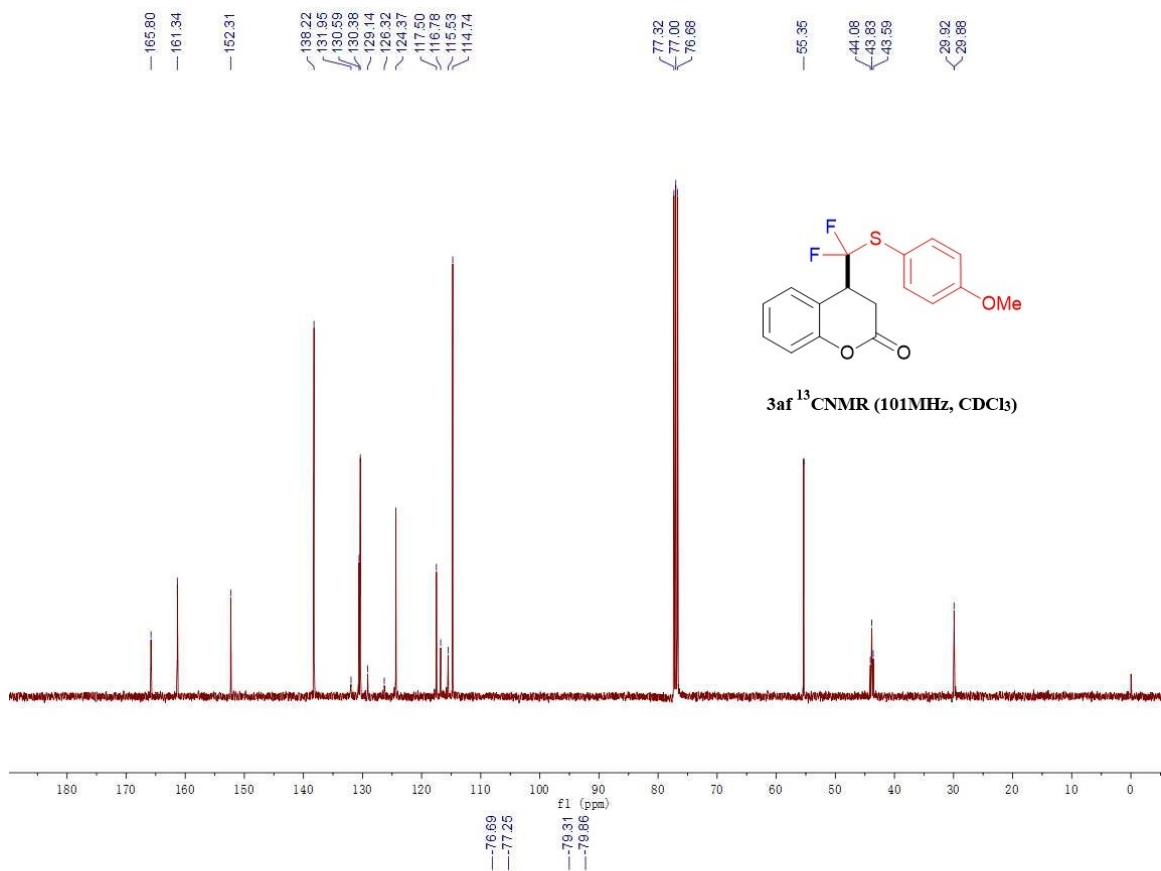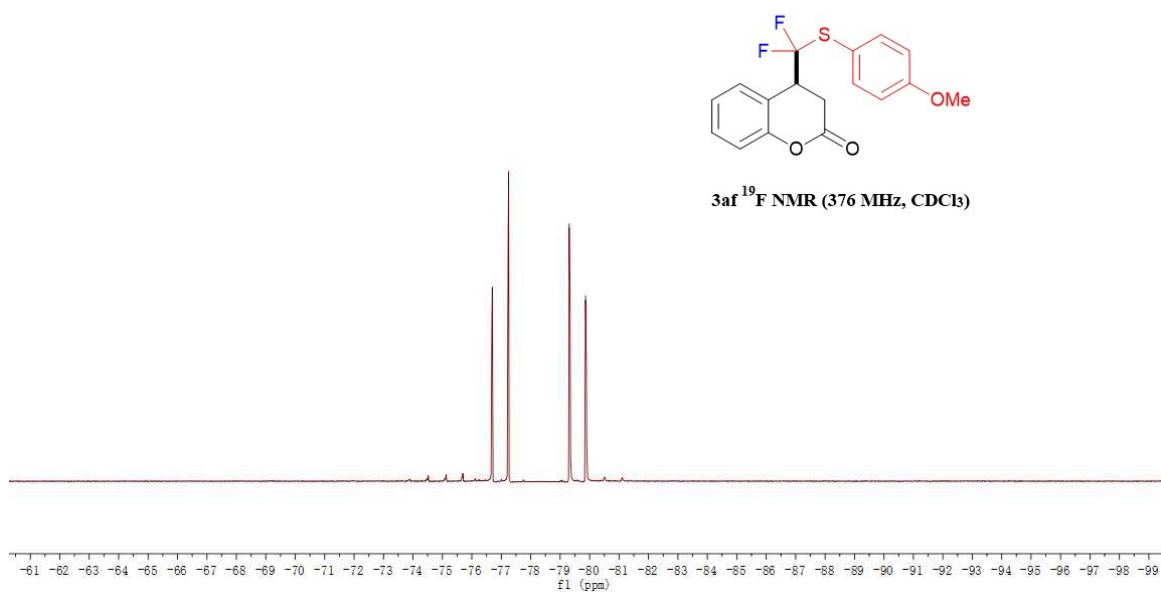

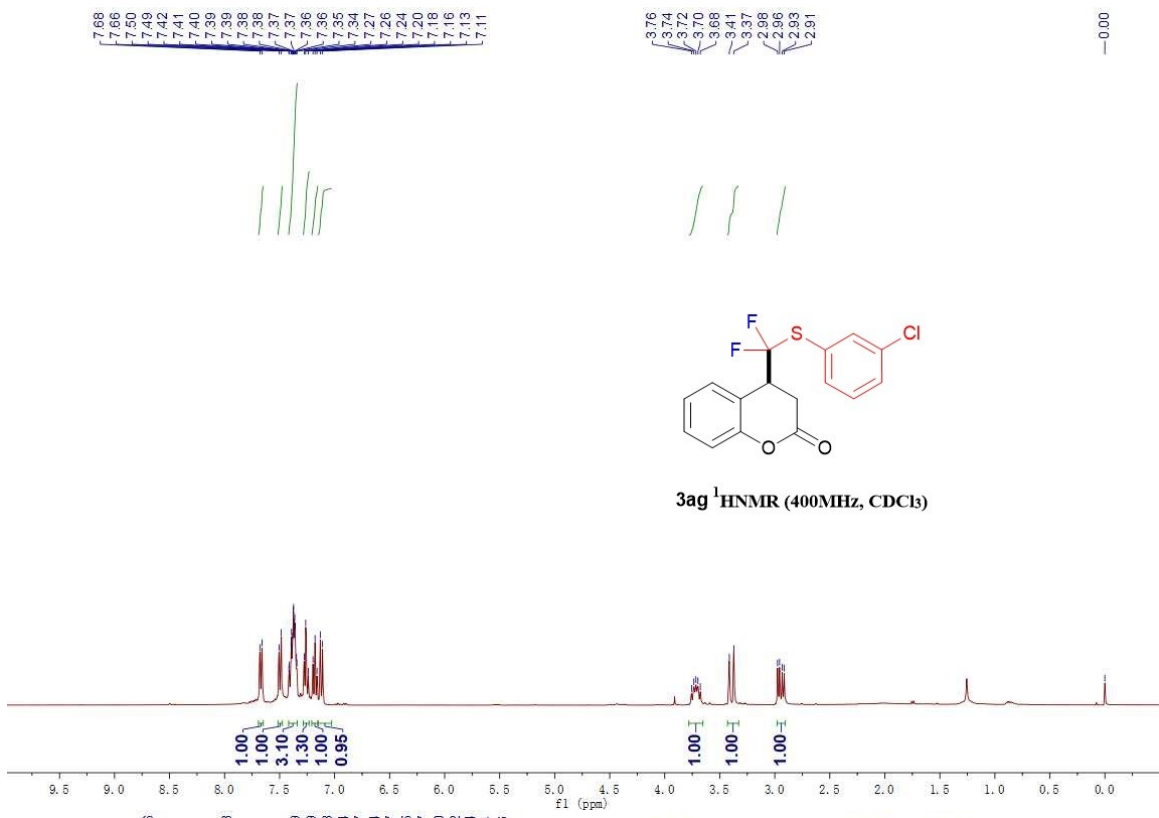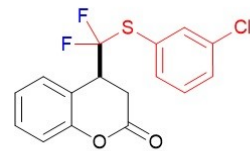

**3ag**  $^1\text{H}$ NMR (400MHz,  $\text{CDCl}_3$ )

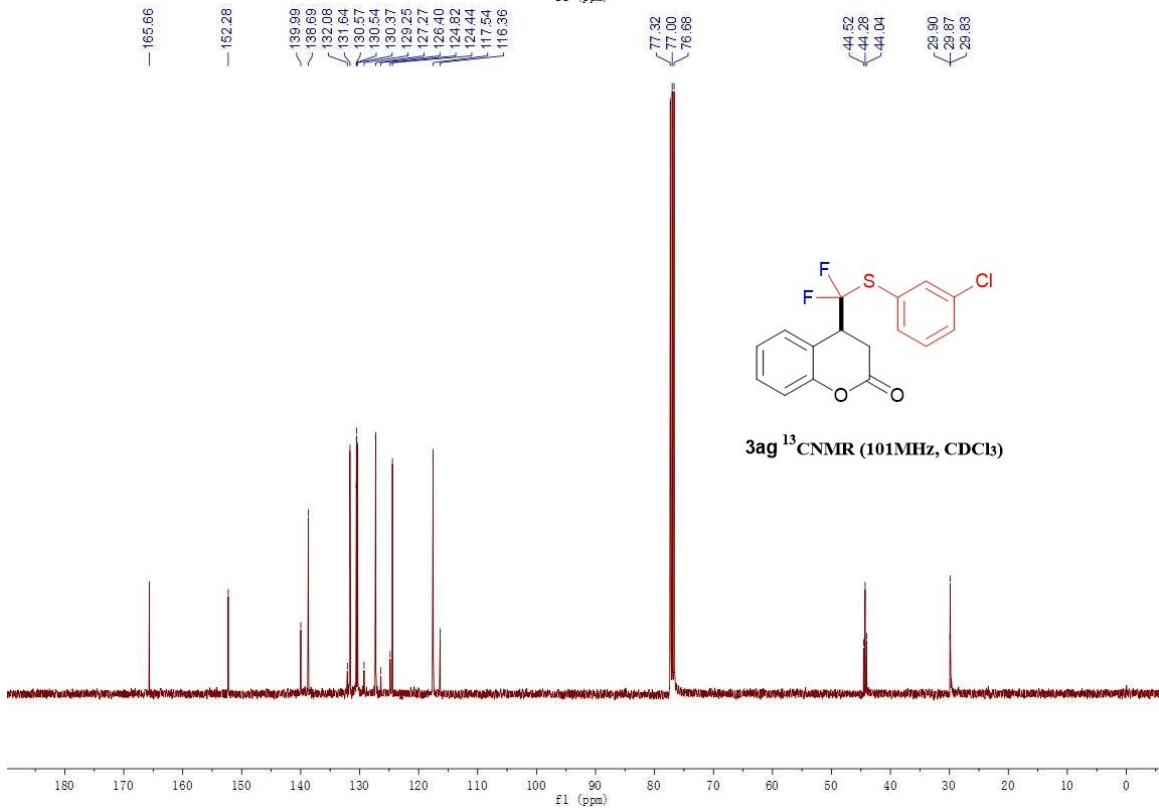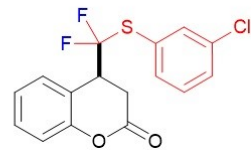

**3ag**  $^{13}\text{C}$ NMR (101MHz,  $\text{CDCl}_3$ )

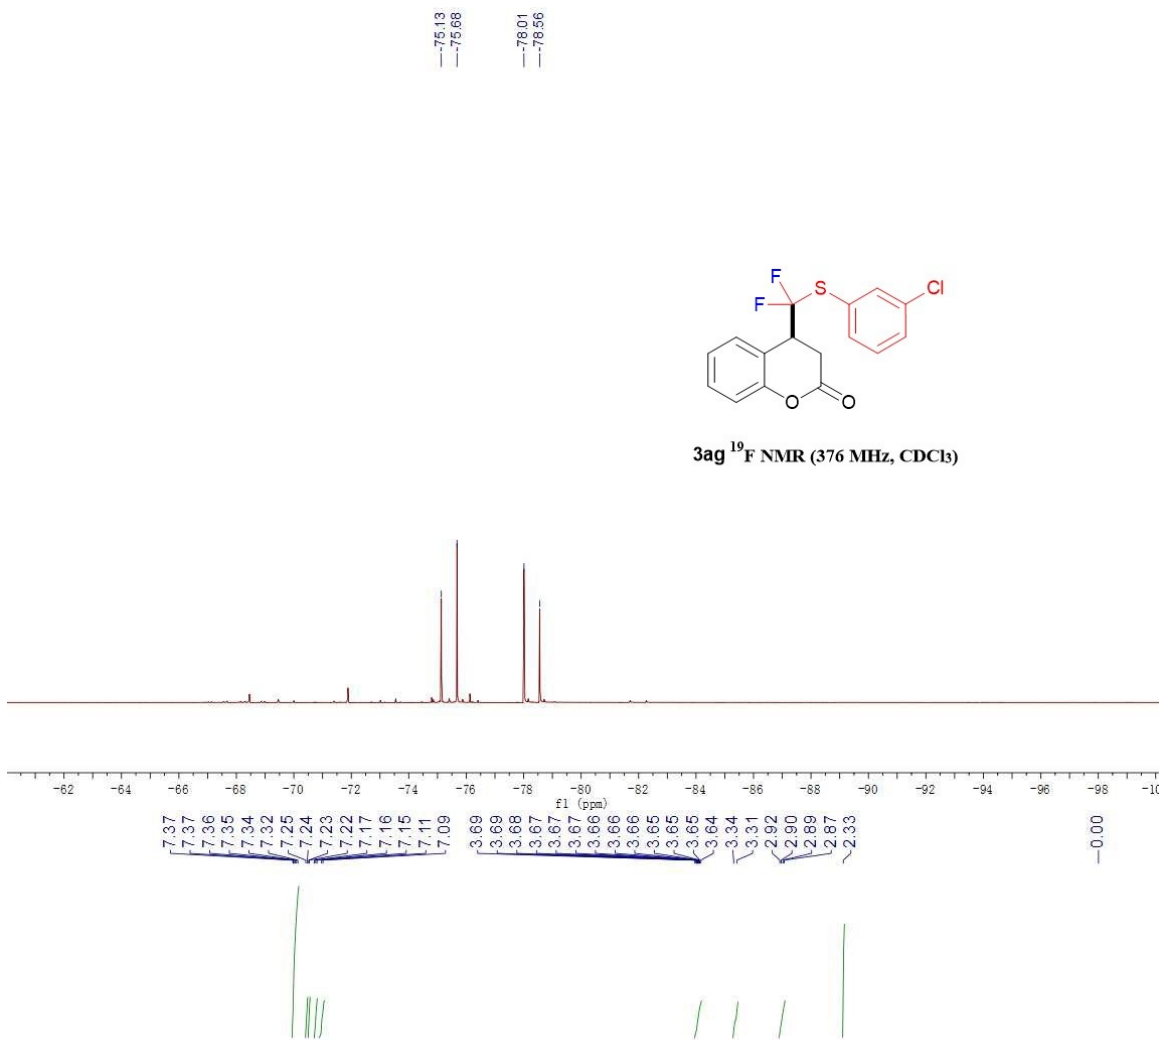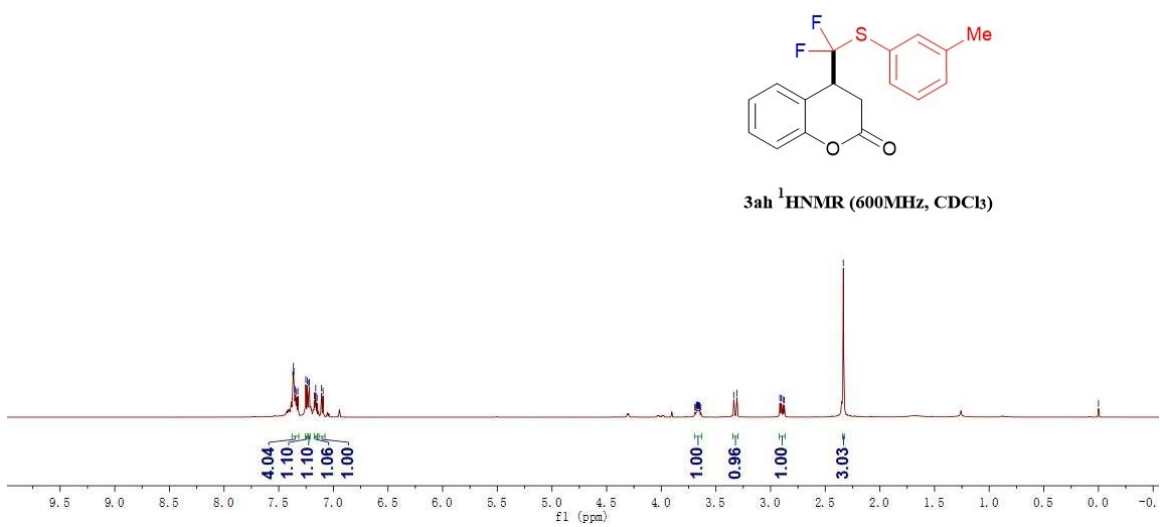

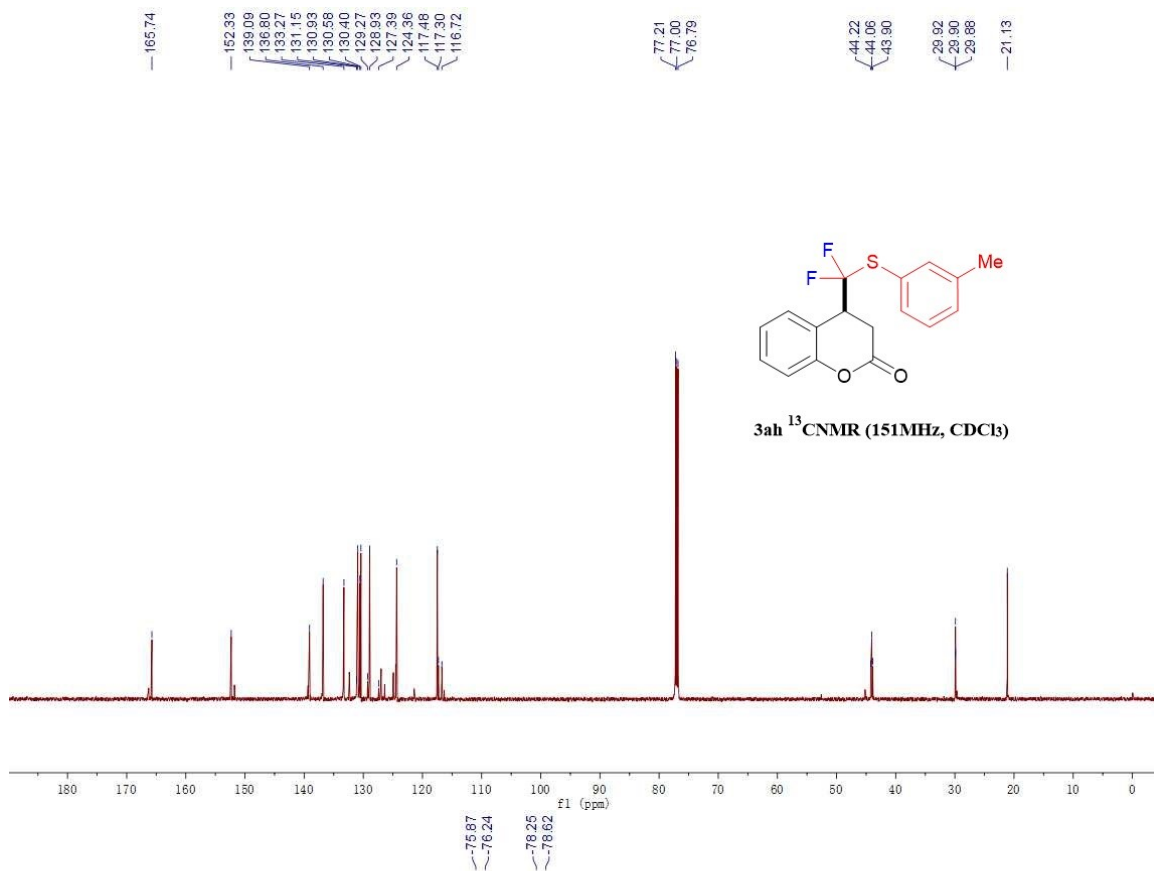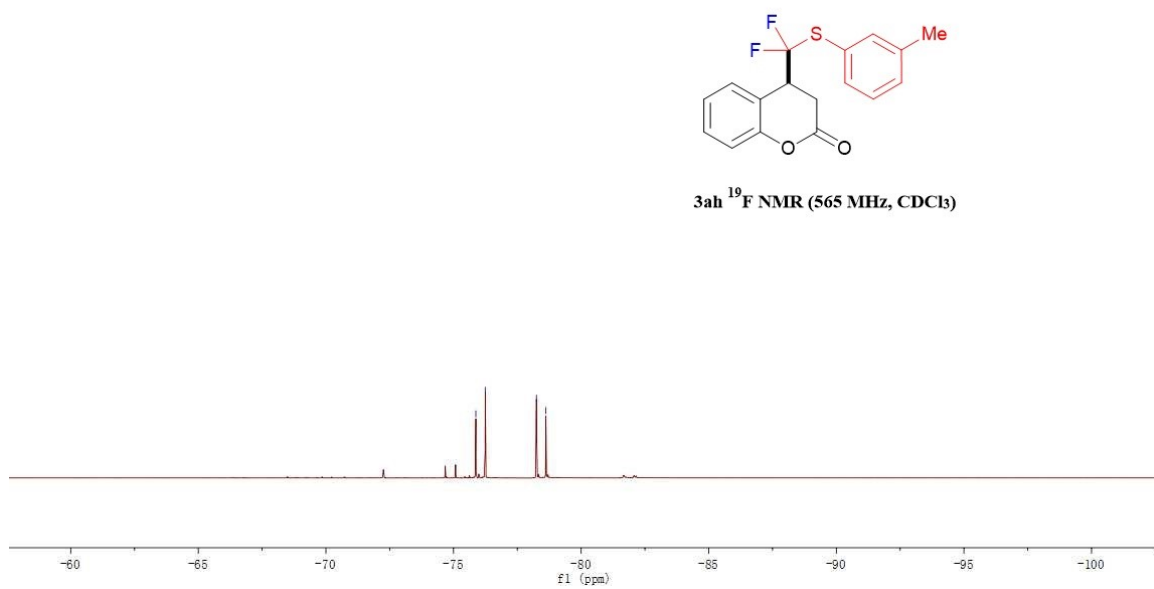

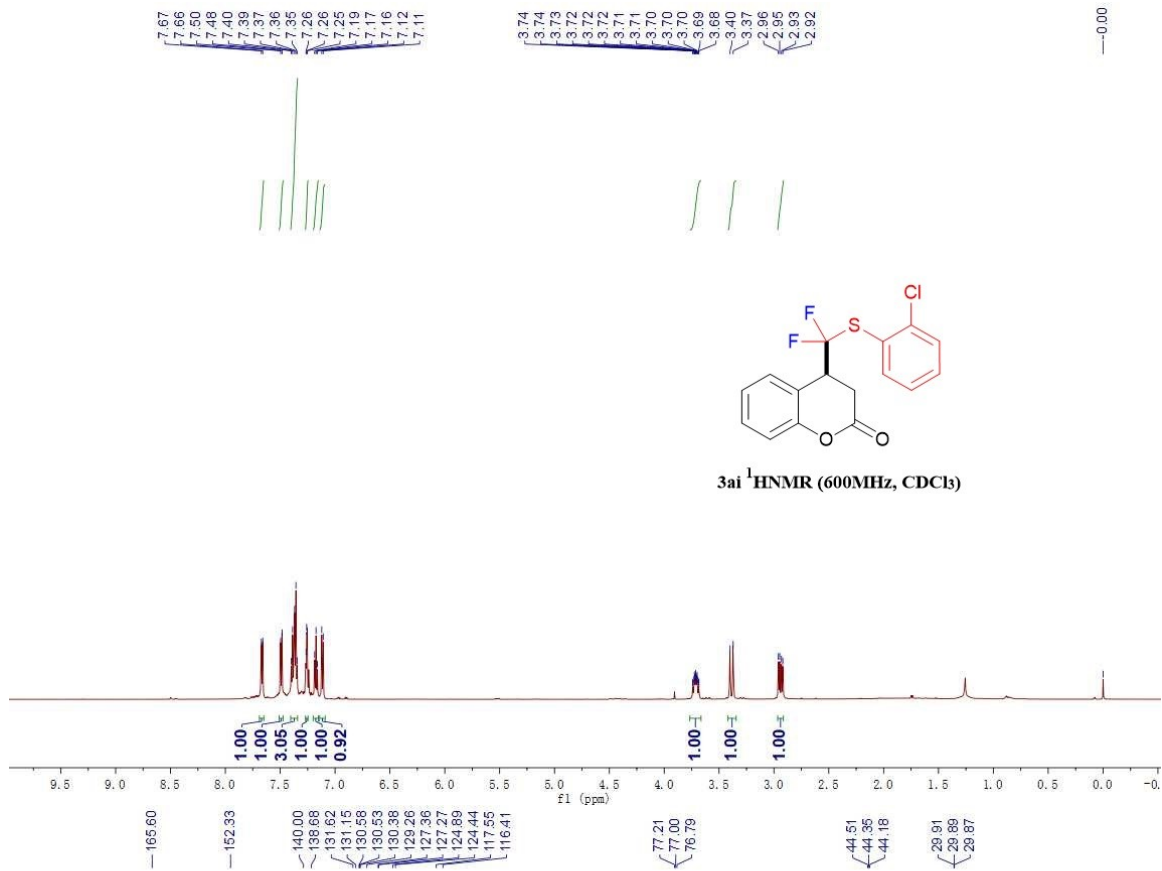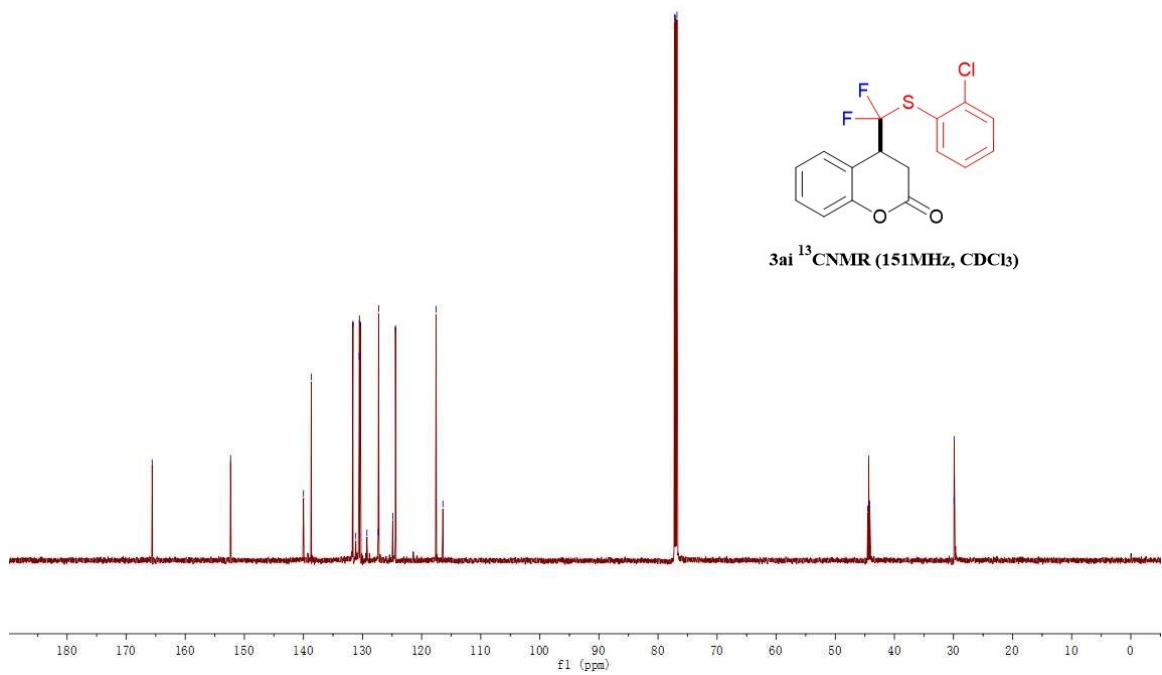



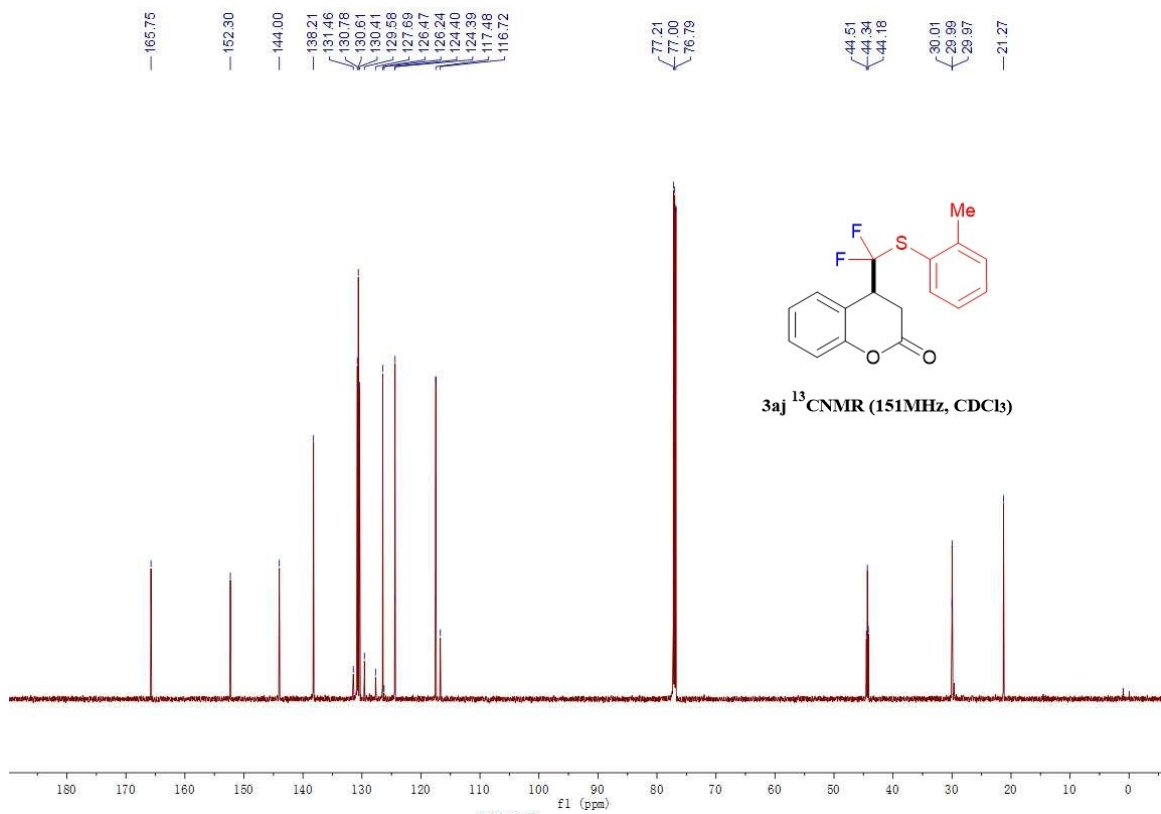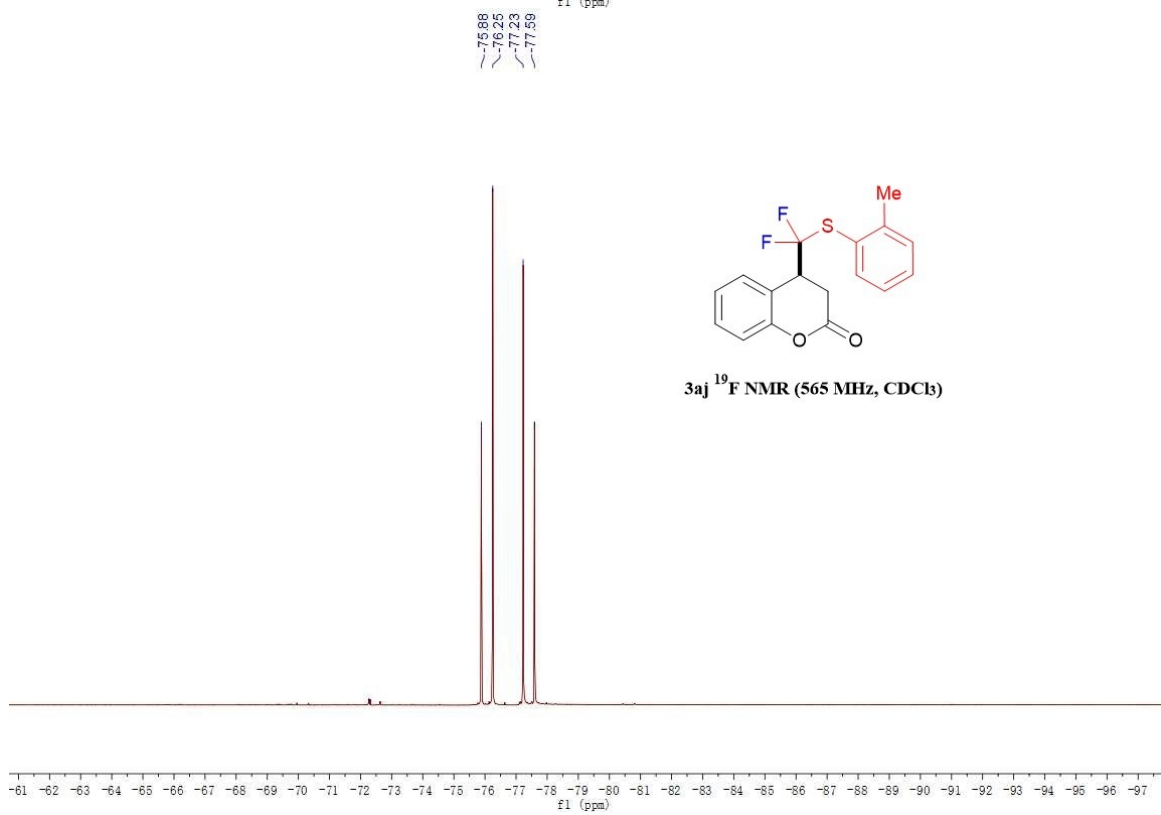

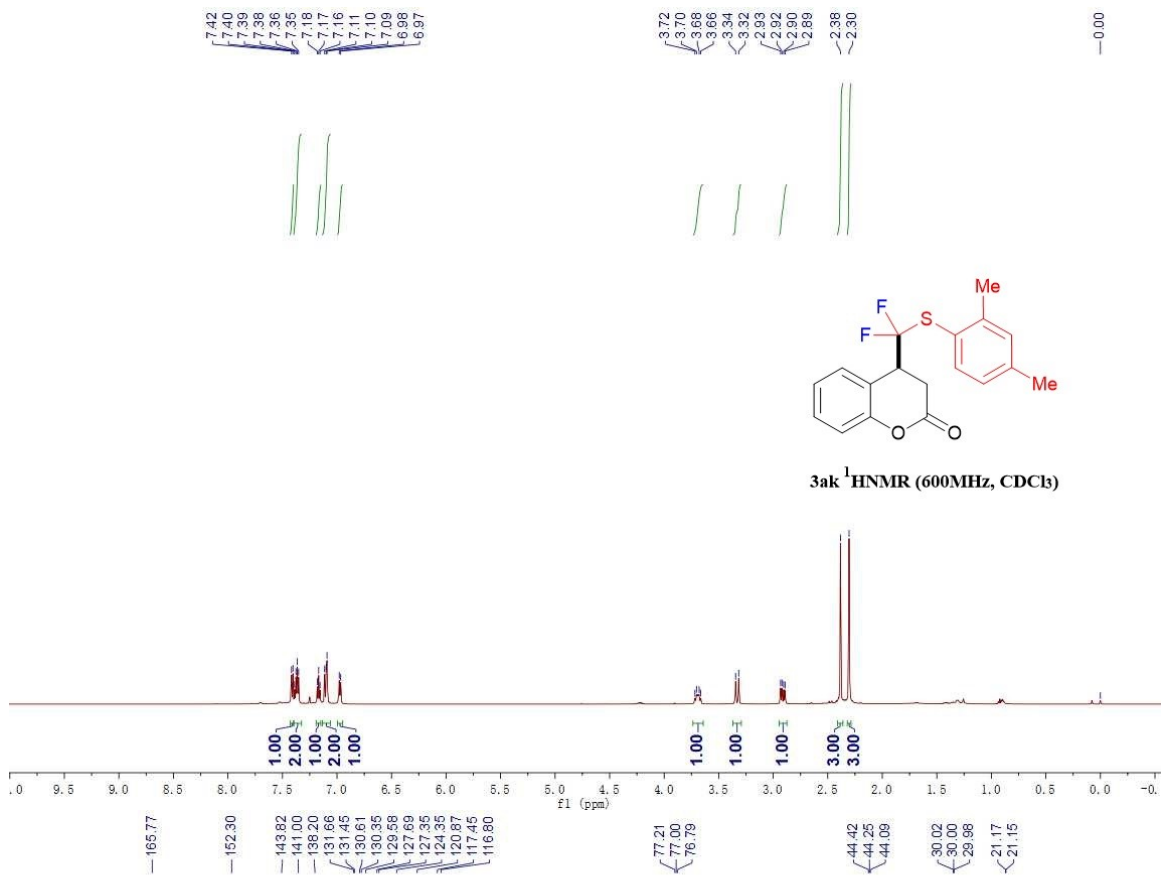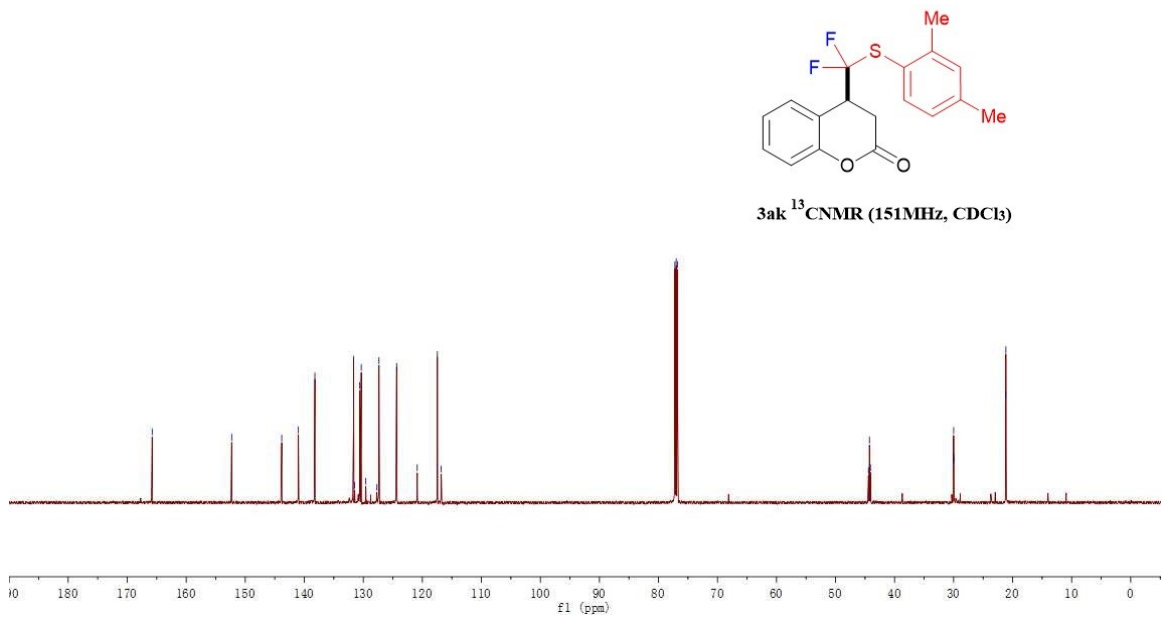



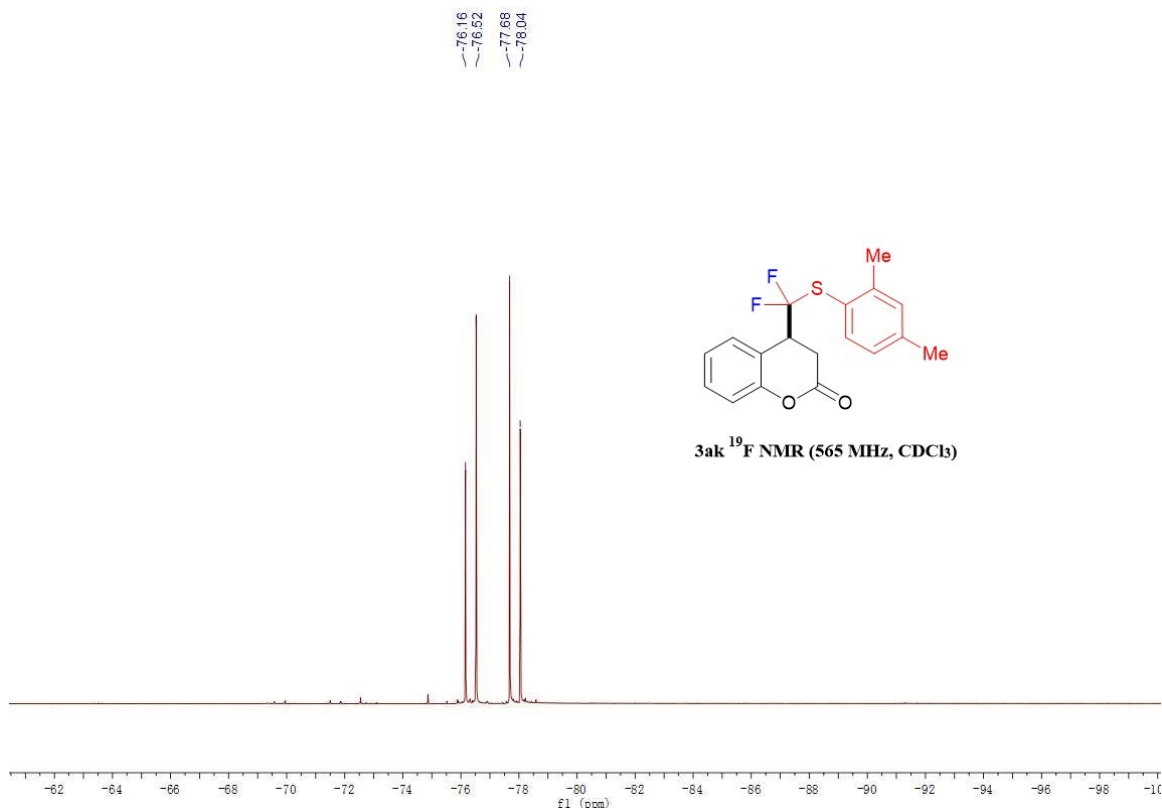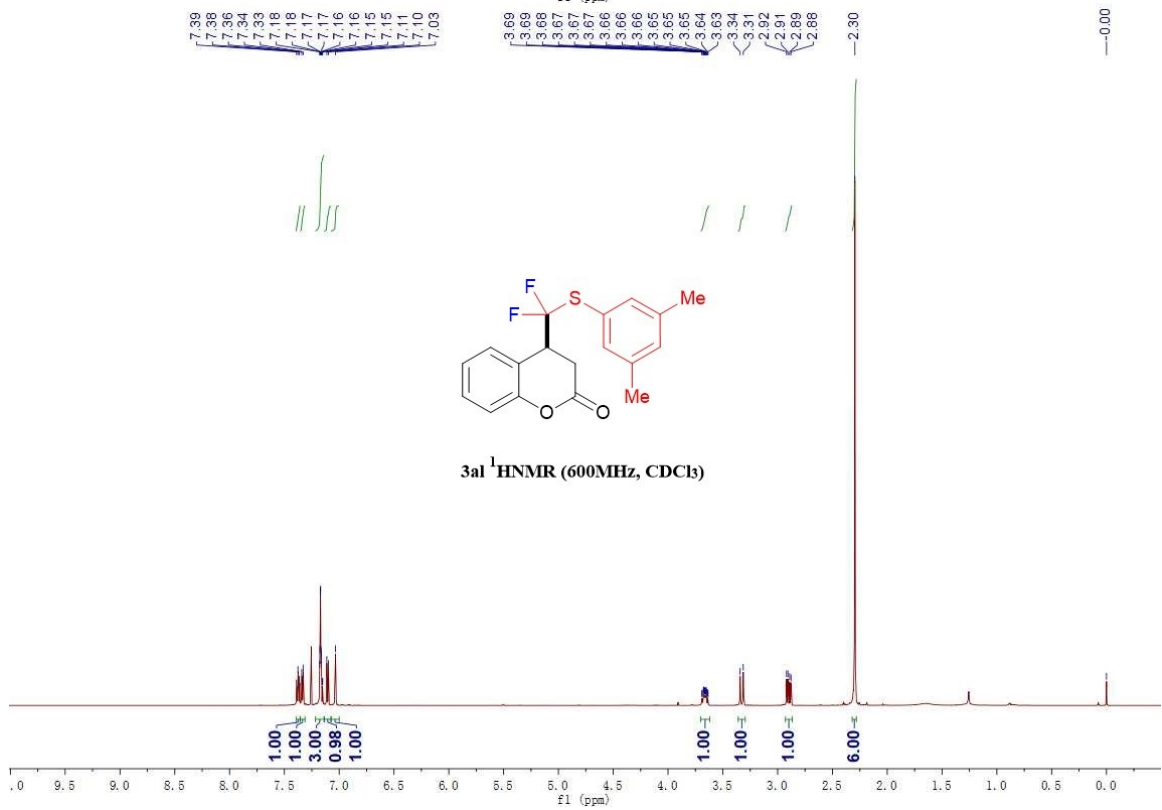

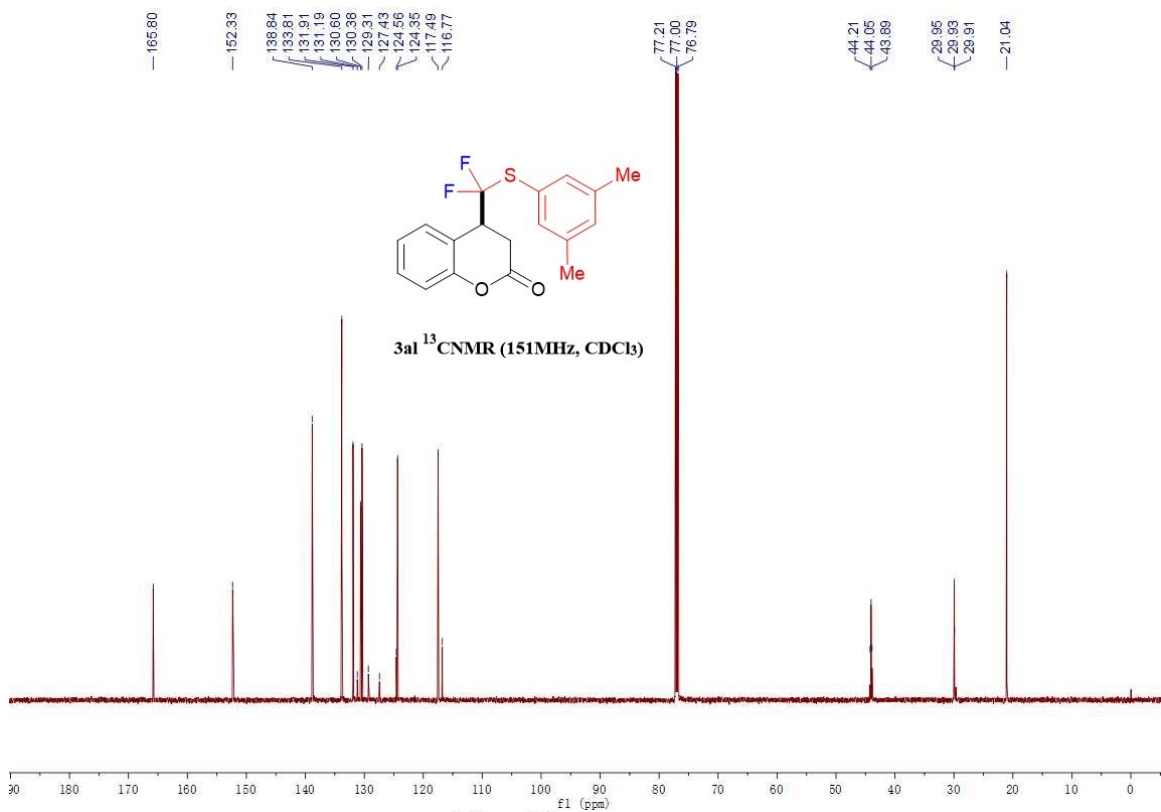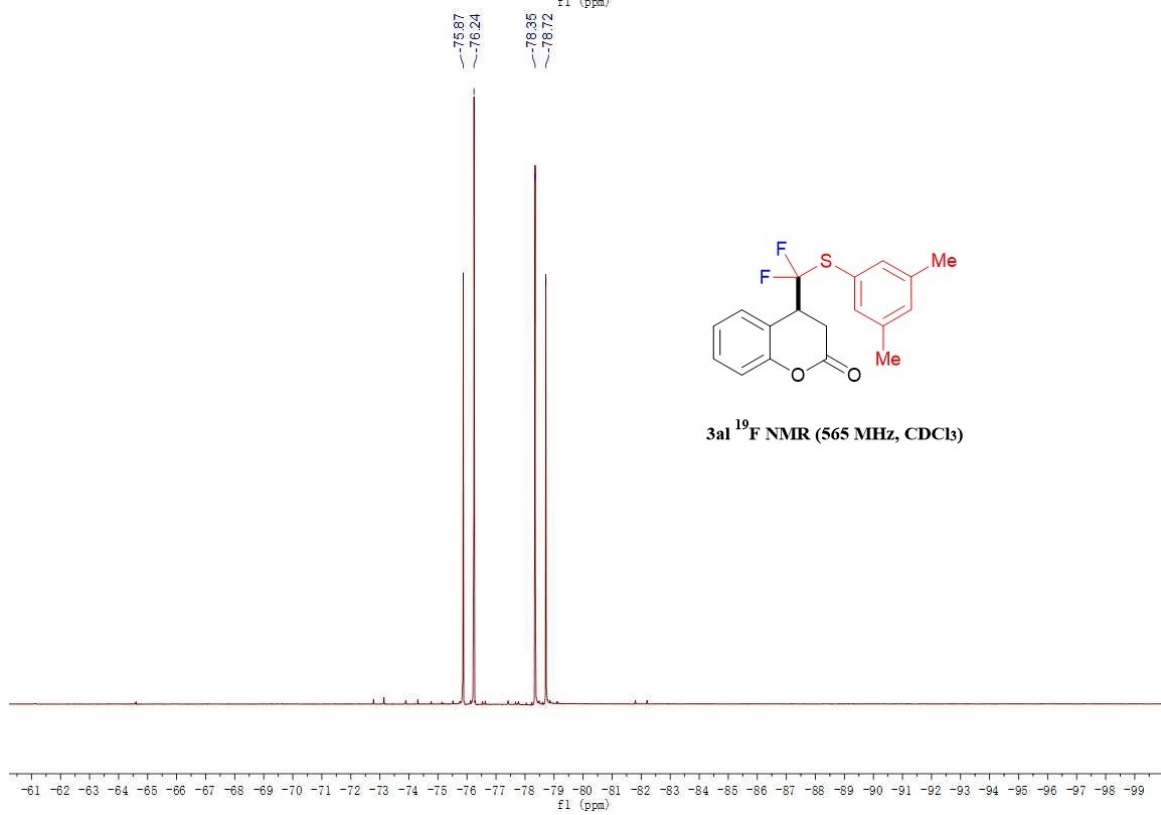

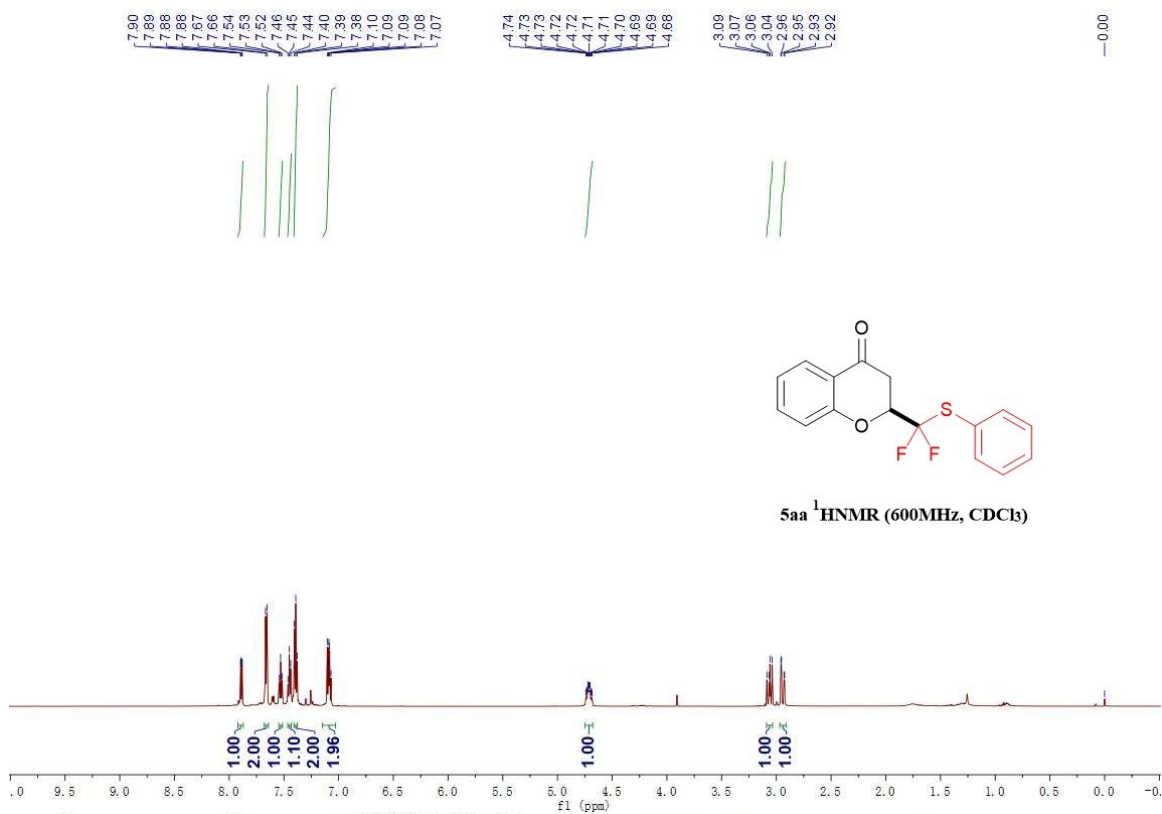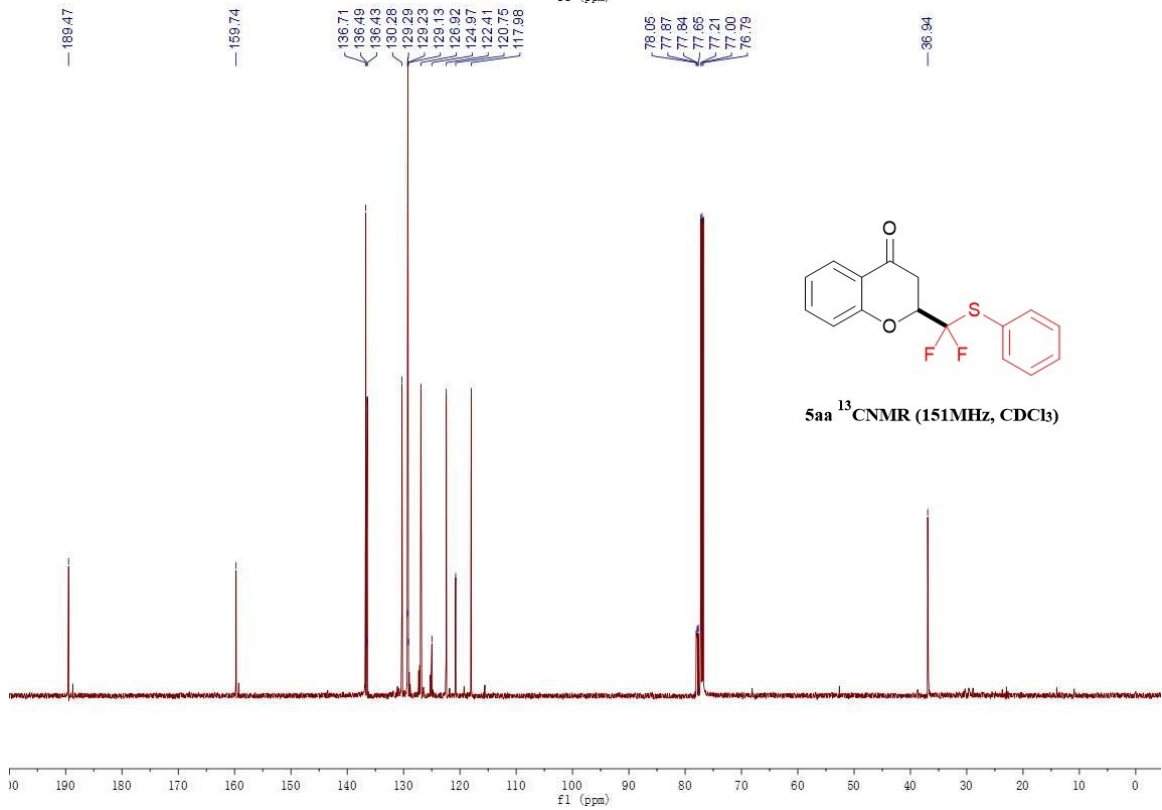



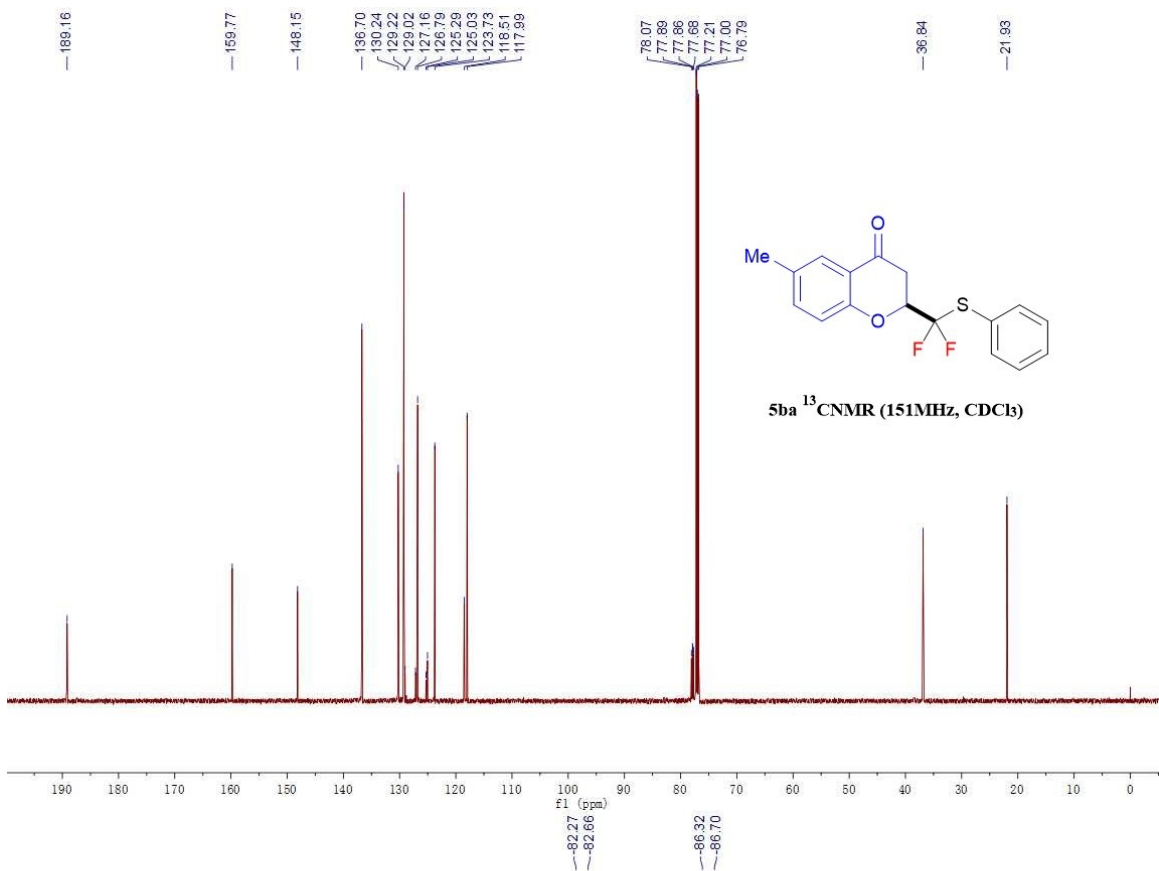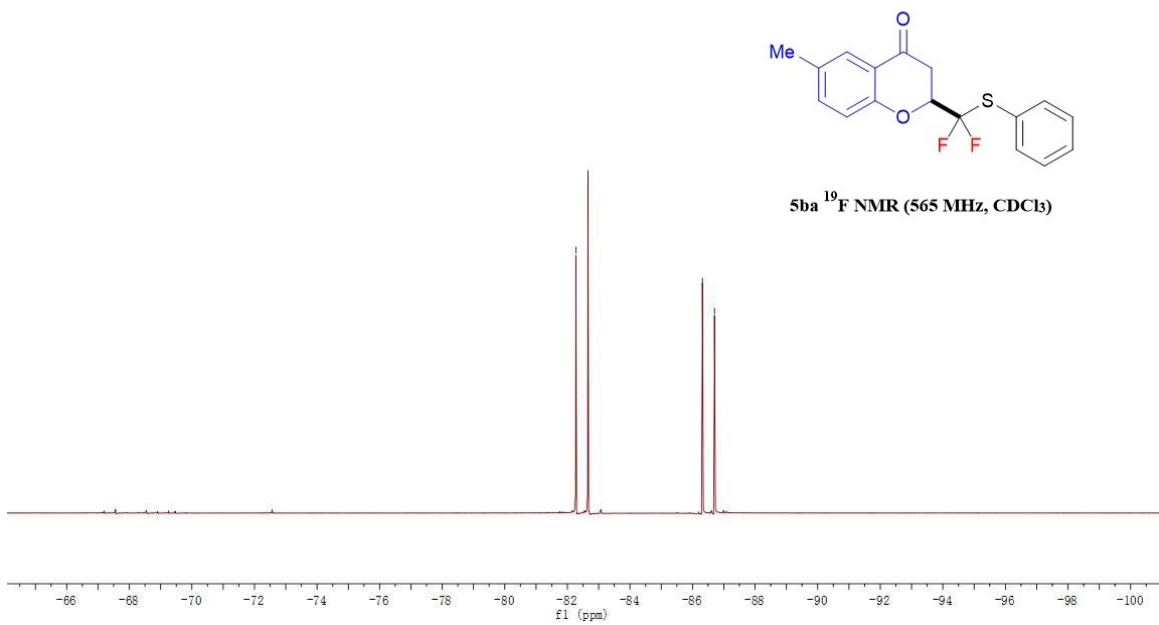

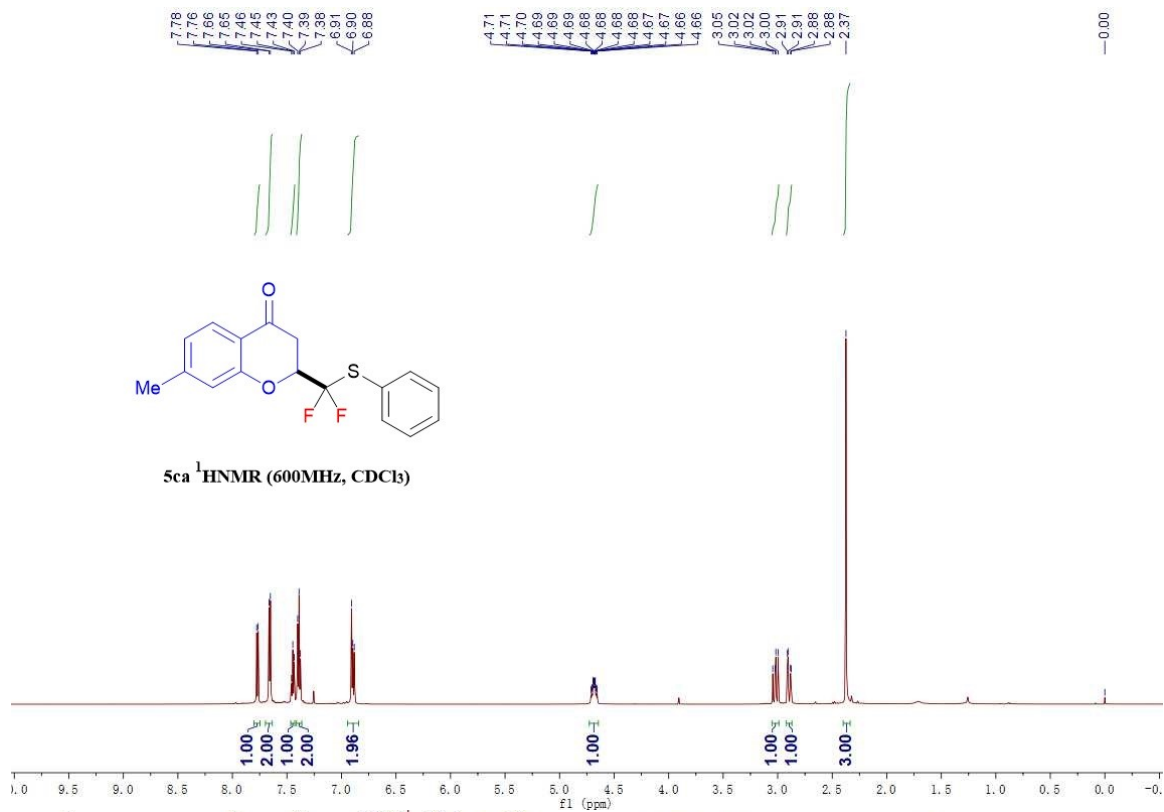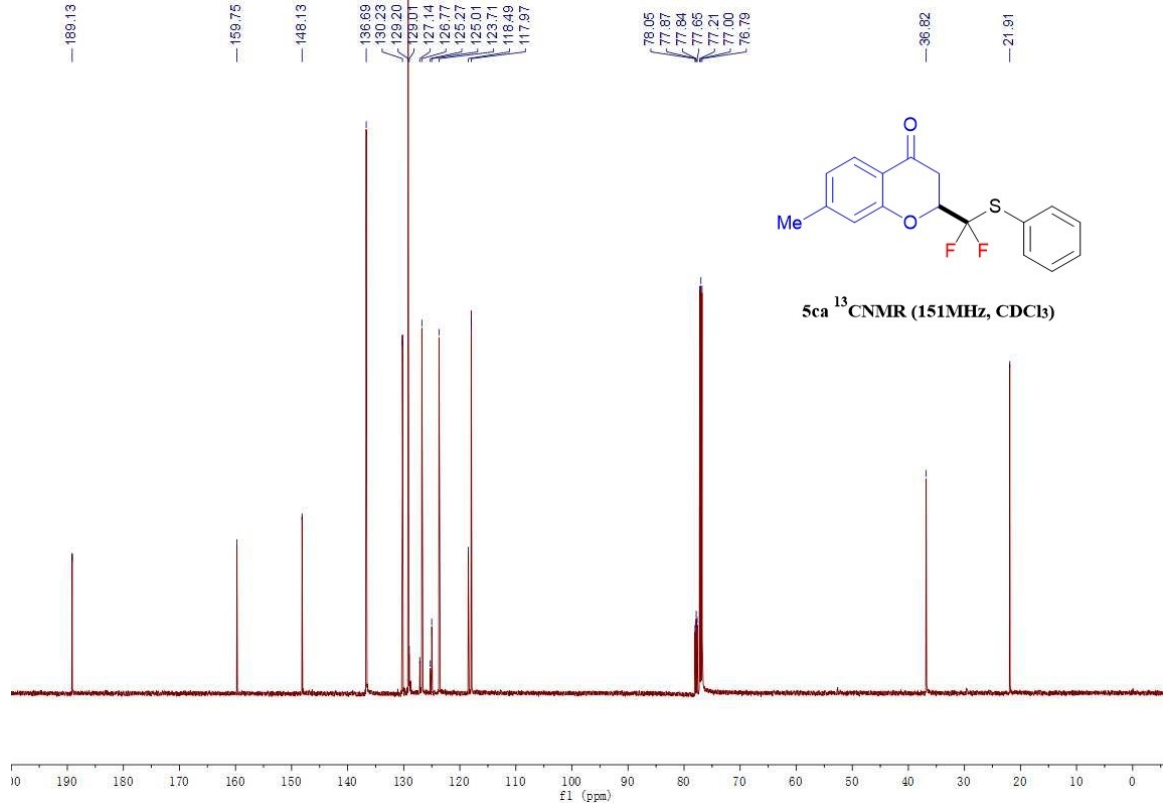

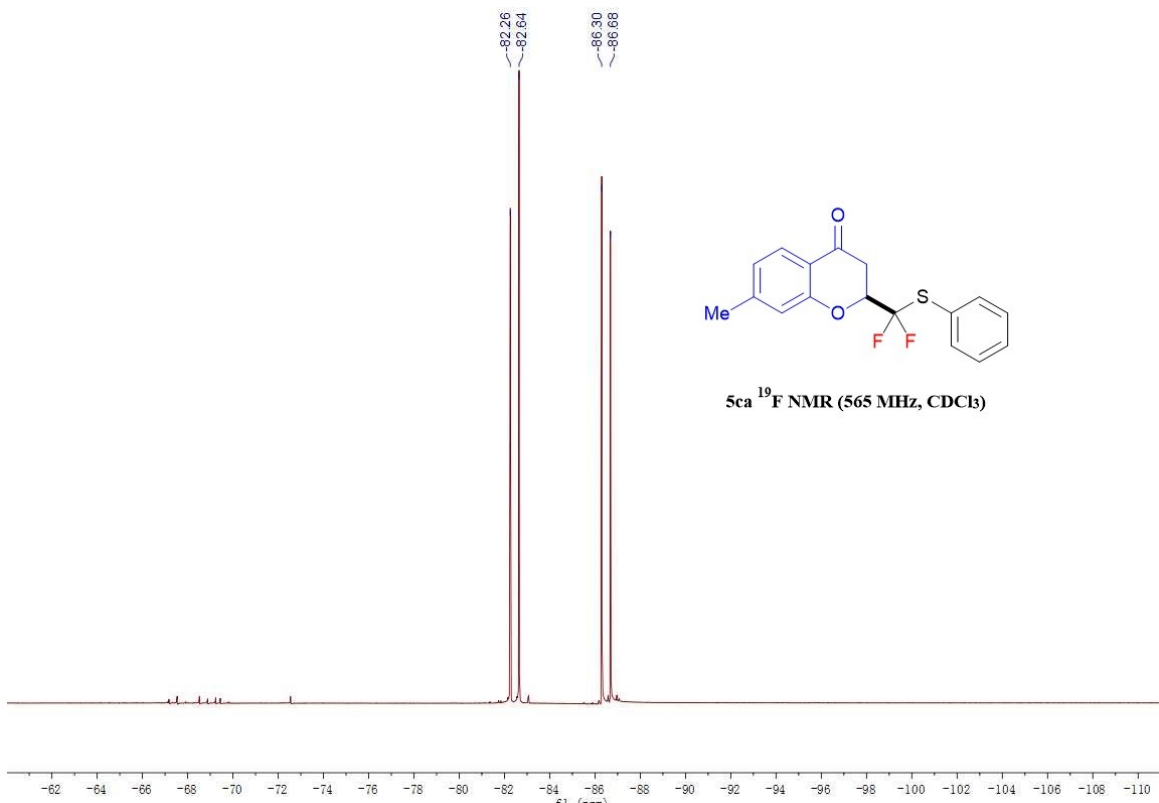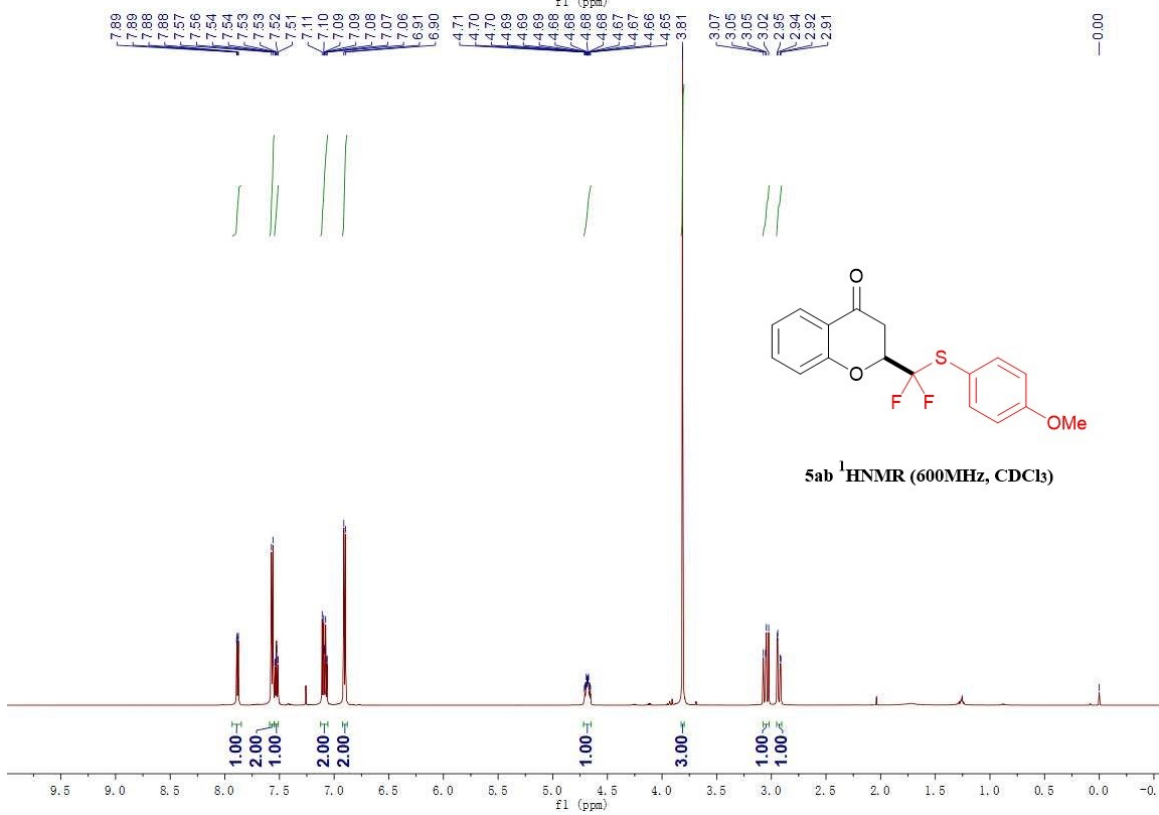

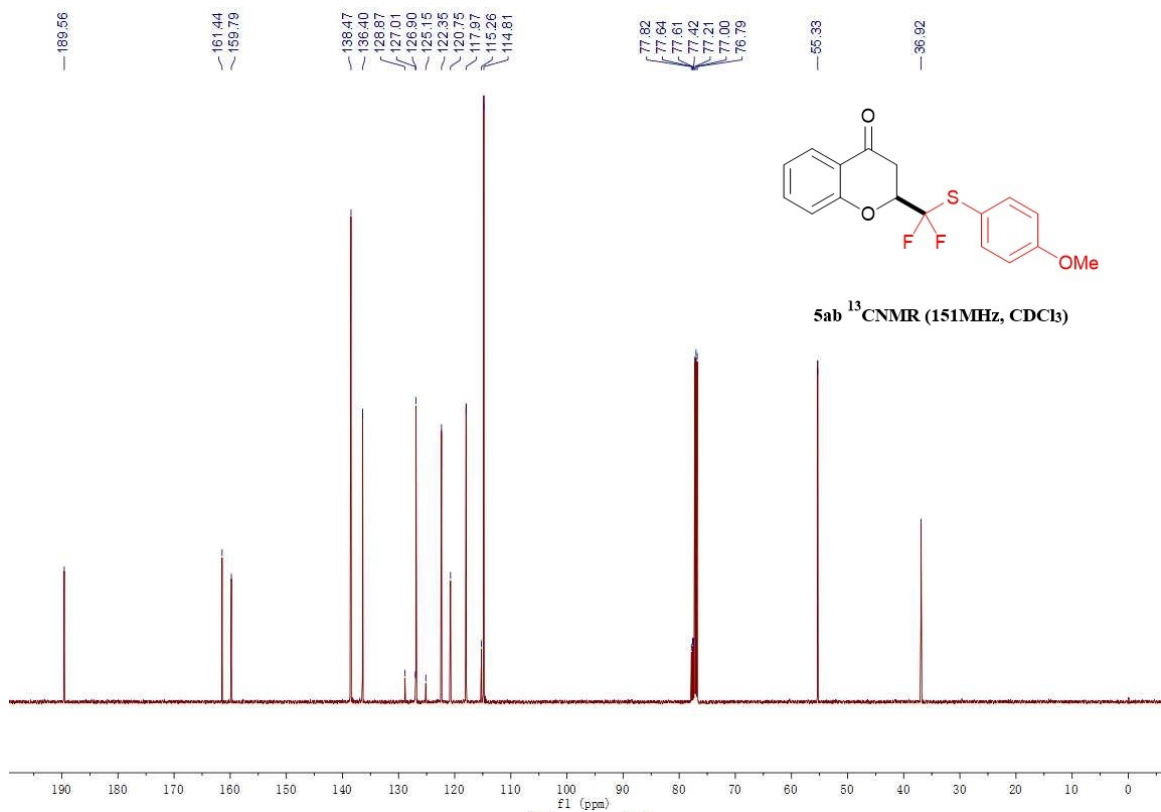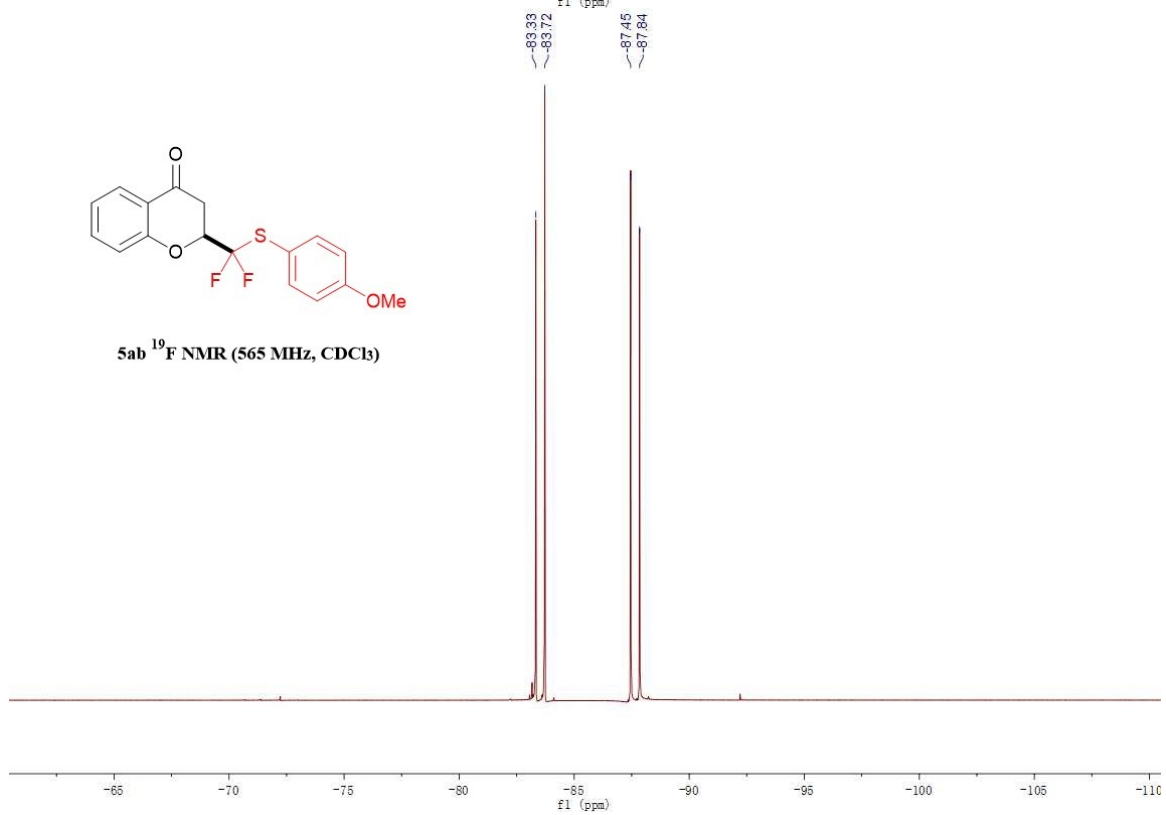



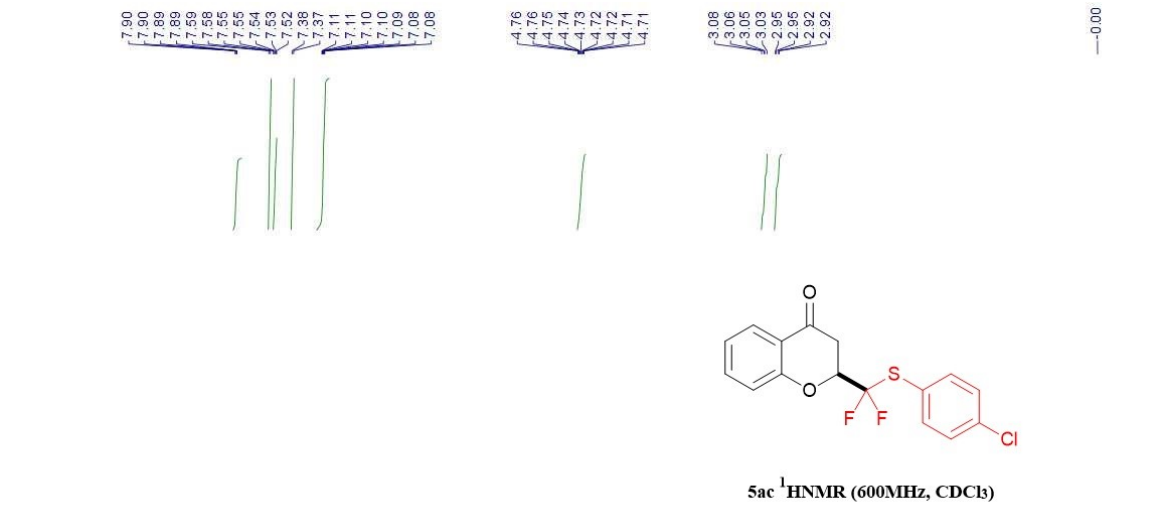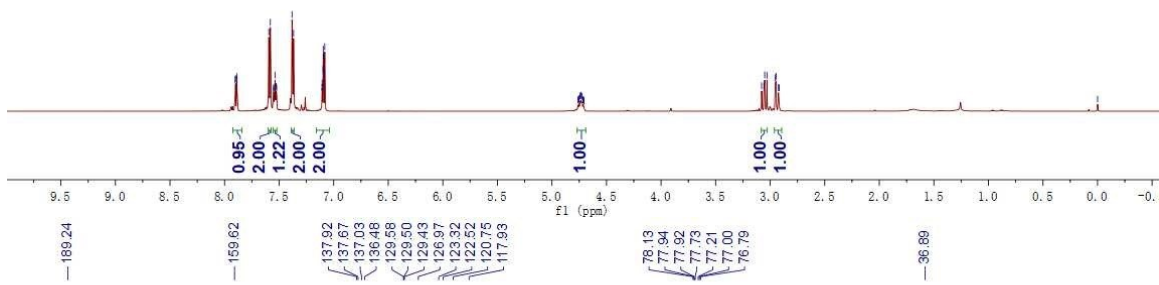

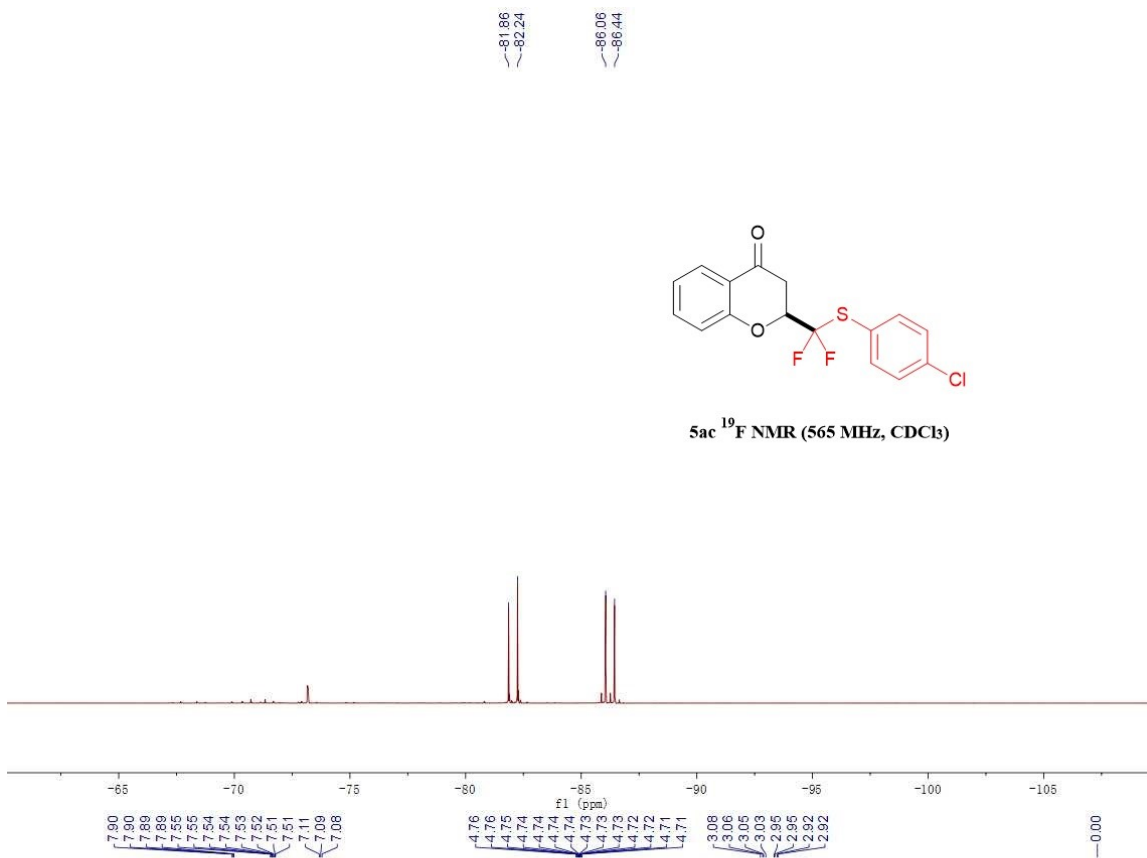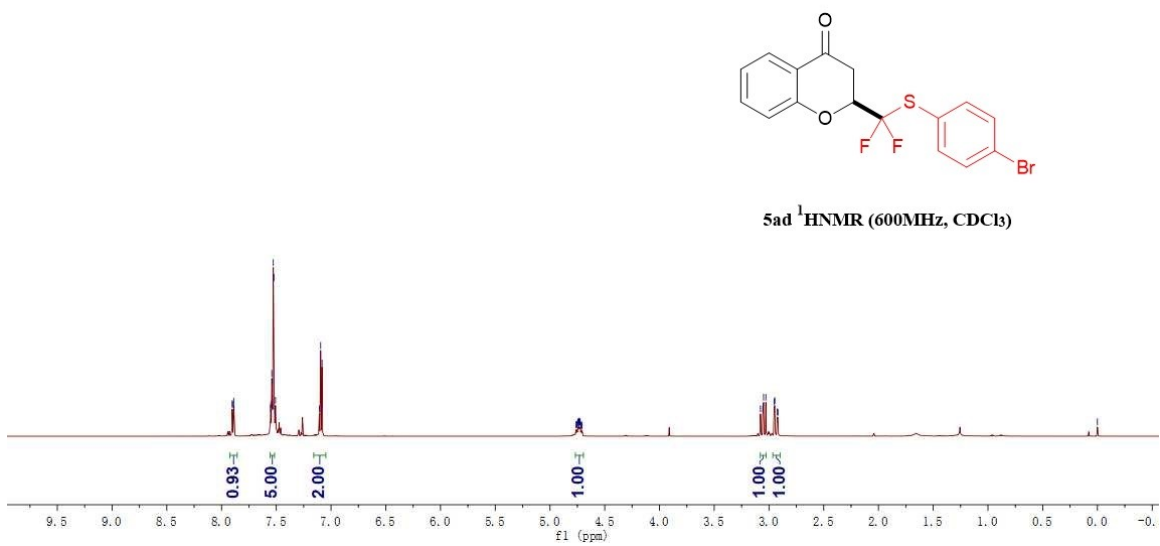

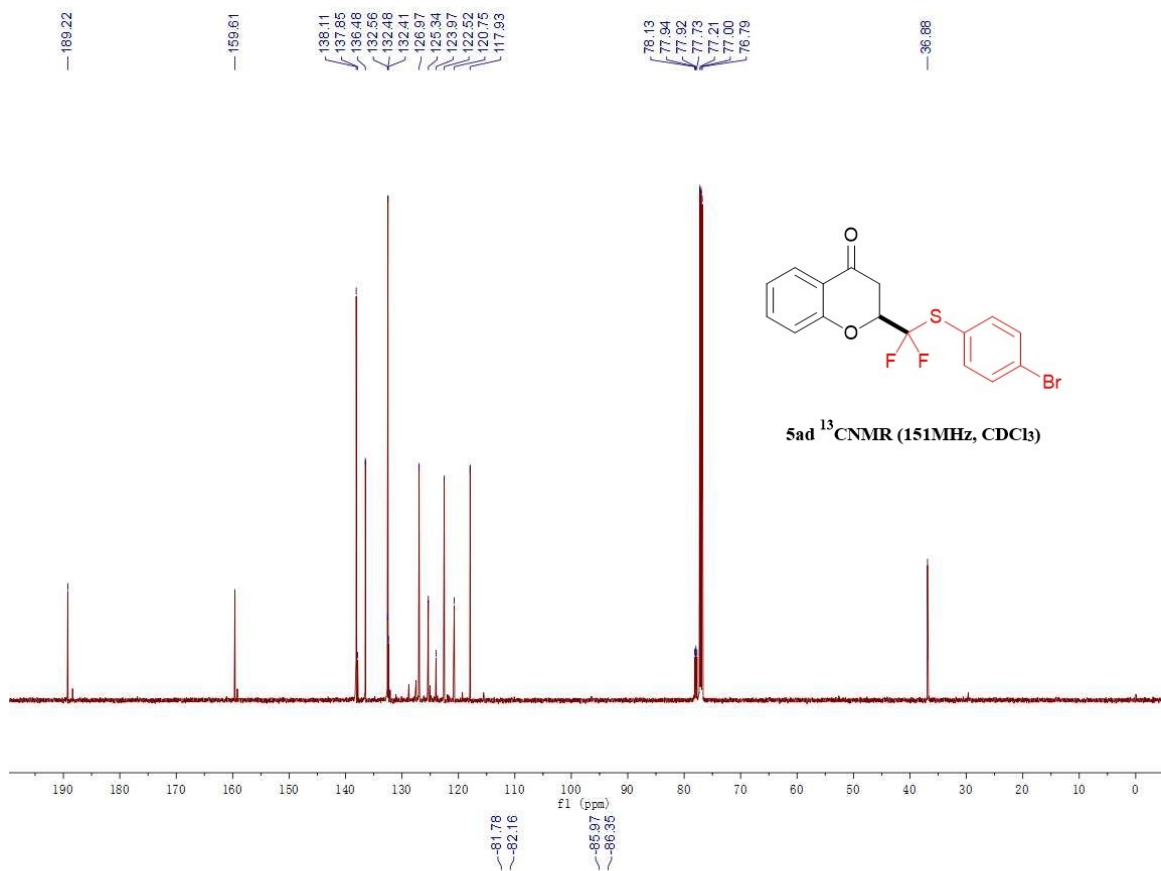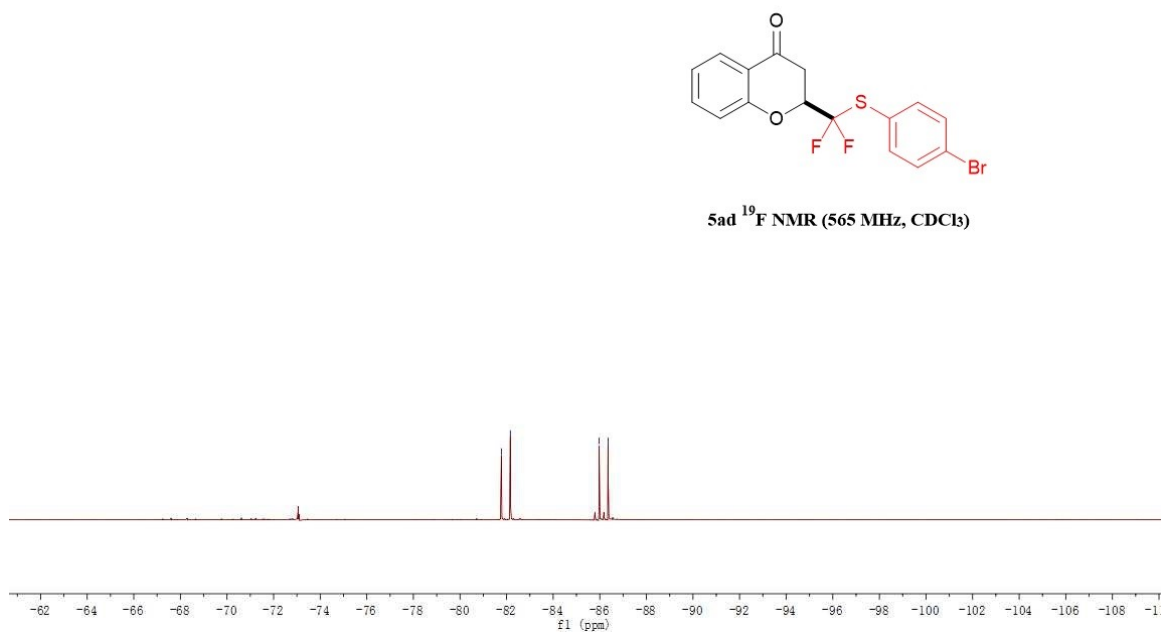

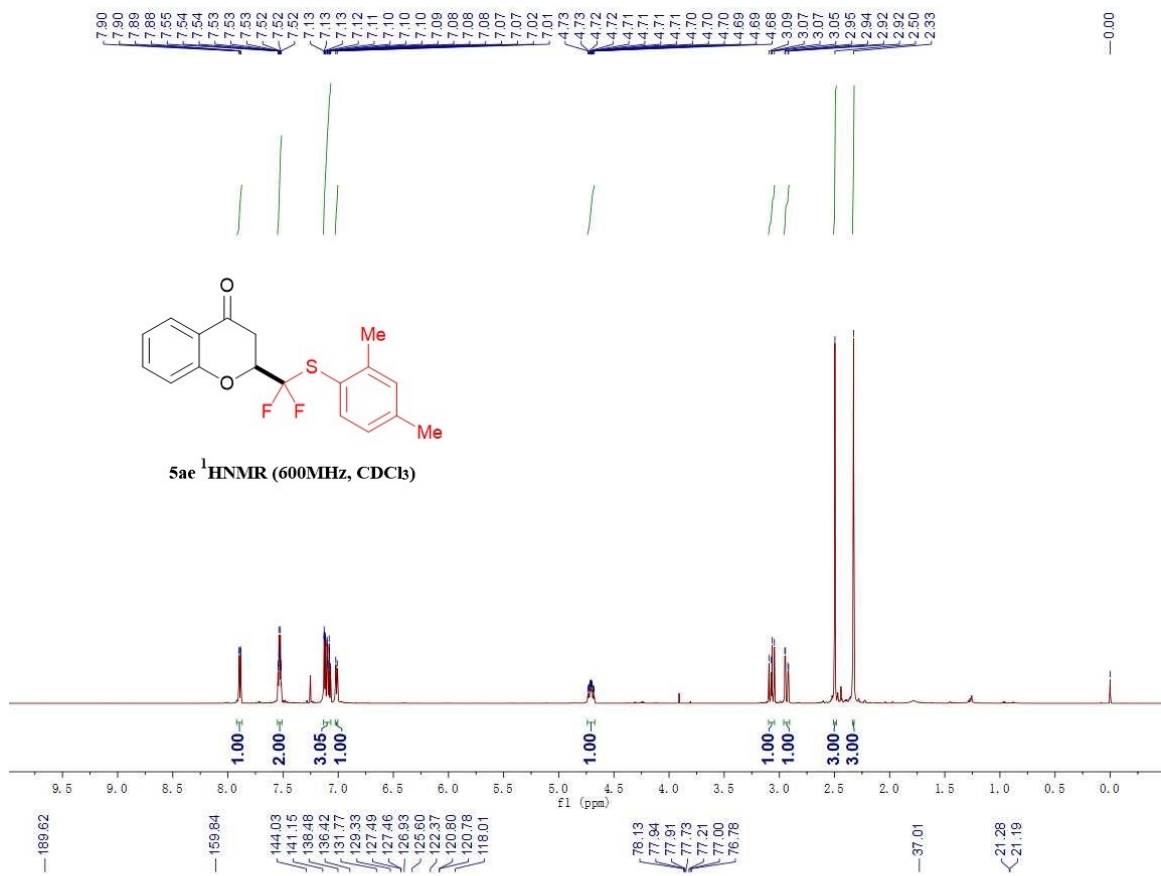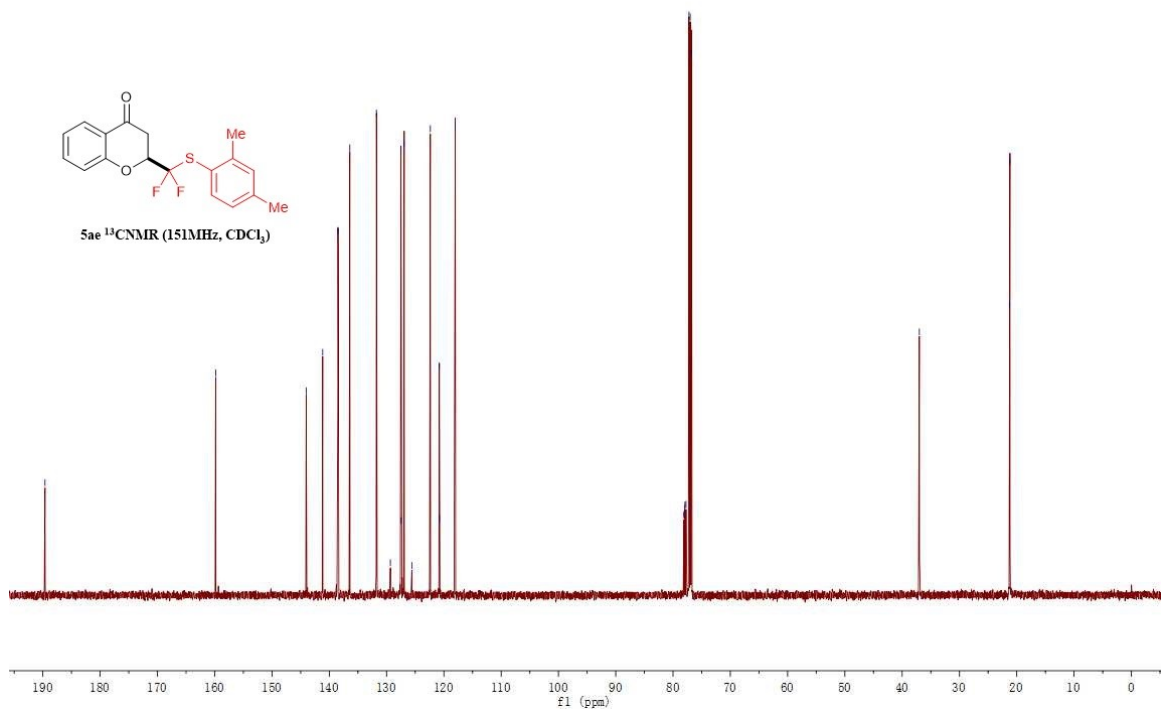

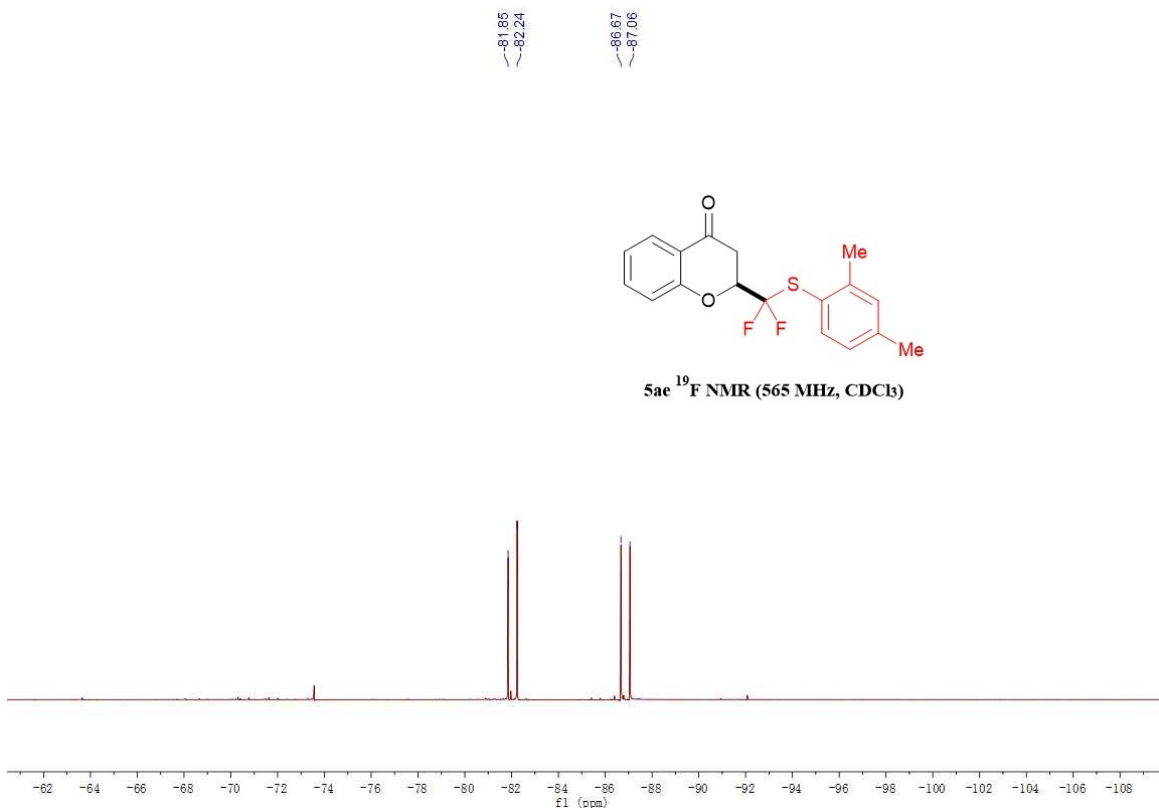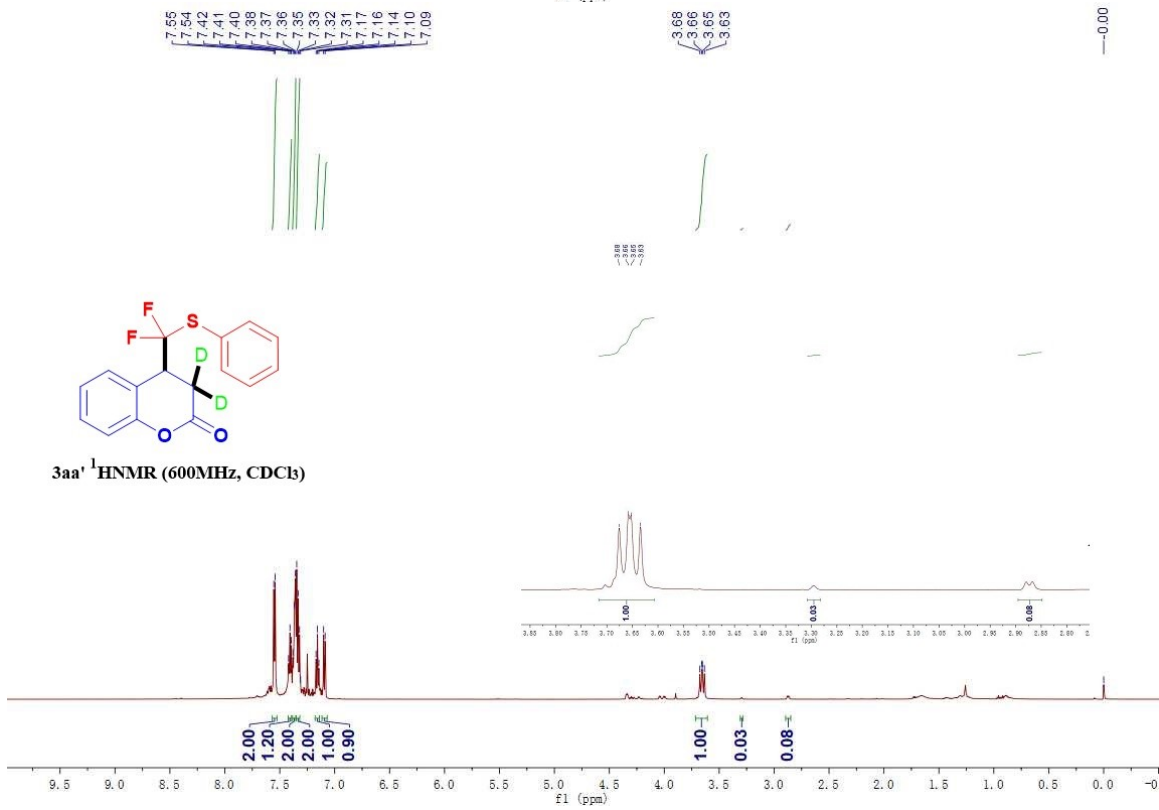

## 6.The HRMS spectra for Compound 7

HRMS (ESI)  $m/z$ :  $[M+H]^+$  calcd for  $C_{16}H_{23}F_2NNaOS$  + 338.1361; found 338.1365.

### Mass Spectrum SmartFormula Report

|                      |                                                          |                   |                       |
|----------------------|----------------------------------------------------------|-------------------|-----------------------|
| <b>Analysis Info</b> |                                                          | Acquisition Date  | 6/10/2021 11:21:30 AM |
| Analysis Name        | D:\Data\2021\0609\SJ-20210608-375-TEMPO_1-D,8_01_15343.d | Operator          | BDAL@DE               |
| Method               | lcms_pos_2min.m                                          | Instrument / Ser# | micrOTOF-Q II 10366   |
| Sample Name          | SJ-20210608-375-TEMPO                                    |                   |                       |
| Comment              |                                                          |                   |                       |

|                              |            |                       |           |                  |           |
|------------------------------|------------|-----------------------|-----------|------------------|-----------|
| <b>Acquisition Parameter</b> |            |                       |           |                  |           |
| Source Type                  | ESI        | Ion Polarity          | Positive  | Set Nebulizer    | 0.8 Bar   |
| Focus                        | Not active | Set Capillary         | 5500 V    | Set Dry Heater   | 200 °C    |
| Scan Begin                   | 50 m/z     | Set End Plate Offset  | -500 V    | Set Dry Gas      | 2.0 l/min |
| Scan End                     | 1000 m/z   | Set Collision Cell RF | 150.0 Vpp | Set Divert Valve | Waste     |

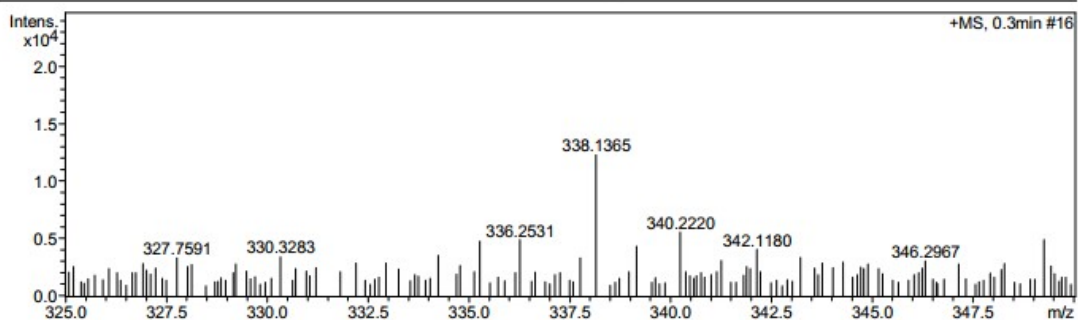

| Meas. m/z | Formula                | m/z      | err [ppm] | mSigma |
|-----------|------------------------|----------|-----------|--------|
| 338.1365  | C 16 H 23 F 2 N Na O S | 338.1361 | -1.4      | 121.3  |

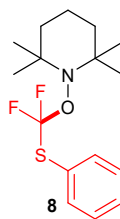

## 7.X-ray crystallography date of 3ab

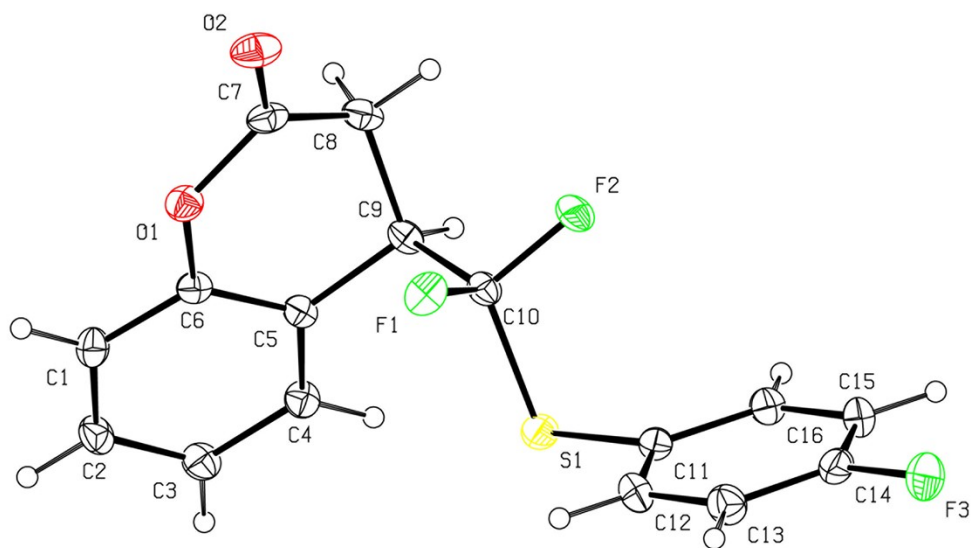

### Crystal structure determination of 3ab.

Crystal Data for  $C_{16}H_{11}F_3O_2S$  ( $M=324.31$  g/mol): monoclinic, space group  $P2_1/c$  (no. 14),  $a = 15.060(7)$  Å,  $b = 5.814(3)$  Å,  $c = 17.346(7)$  Å,  $\beta = 114.484(18)^\circ$ ,  $V = 1382.2(11)$  Å<sup>3</sup>,  $Z = 4$ ,  $T = 170.0$  K,  $\mu(\text{MoK}\alpha) = 0.273$  mm<sup>-1</sup>,  $D_{\text{calc}} = 1.558$  g/cm<sup>3</sup>, 22040 reflections measured ( $4.77^\circ \leq 2\theta \leq 54.234^\circ$ ), 3064 unique ( $R_{\text{int}} = 0.0280$ ,  $R_{\text{sigma}} = 0.0172$ ) which were used in all calculations. The final  $R_1$  was 0.0288 ( $I > 2\sigma(I)$ ) and  $wR_2$  was 0.0735 (all data).

**Table 1 Crystal data and structure refinement for 3ab.**

|                     |                       |
|---------------------|-----------------------|
| Identification code | mo_211008_sj_1_0m     |
| Empirical formula   | $C_{16}H_{11}F_3O_2S$ |
| Formula weight      | 324.31                |
| Temperature/K       | 170.0                 |
| Crystal system      | monoclinic            |
| Space group         | $P2_1/c$              |

|                                             |                                                                |
|---------------------------------------------|----------------------------------------------------------------|
| a/Å                                         | 15.060(7)                                                      |
| b/Å                                         | 5.814(3)                                                       |
| c/Å                                         | 17.346(7)                                                      |
| $\alpha$ /°                                 | 90                                                             |
| $\beta$ /°                                  | 114.484(18)                                                    |
| $\gamma$ /°                                 | 90                                                             |
| Volume/Å <sup>3</sup>                       | 1382.2(11)                                                     |
| Z                                           | 4                                                              |
| $\rho_{\text{calc}}$ /g/cm <sup>3</sup>     | 1.558                                                          |
| $\mu$ /mm <sup>-1</sup>                     | 0.273                                                          |
| F(000)                                      | 664.0                                                          |
| Crystal size/mm <sup>3</sup>                | 0.48 × 0.12 × 0.06                                             |
| Radiation                                   | MoK $\alpha$ ( $\lambda$ = 0.71073)                            |
| 2 $\Theta$ range for data collection/°      | 4.77 to 54.234                                                 |
| Index ranges                                | -19 ≤ h ≤ 19, -6 ≤ k ≤ 7, -22 ≤ l ≤ 22                         |
| Reflections collected                       | 22040                                                          |
| Independent reflections                     | 3064 [ $R_{\text{int}}$ = 0.0280, $R_{\text{sigma}}$ = 0.0172] |
| Data/restraints/parameters                  | 3064/0/199                                                     |
| Goodness-of-fit on F <sup>2</sup>           | 1.056                                                          |
| Final R indexes [ $I \geq 2\sigma(I)$ ]     | $R_1$ = 0.0288, $wR_2$ = 0.0699                                |
| Final R indexes [all data]                  | $R_1$ = 0.0338, $wR_2$ = 0.0735                                |
| Largest diff. peak/hole / e Å <sup>-3</sup> | 0.28/-0.22                                                     |

**Table 2 Bond lengths for 3ab.**

| Atom | Atom | Length/Å    | Atom | Atom | Length/Å    |
|------|------|-------------|------|------|-------------|
| S1   | C10  | 1.8077 (14) | C4   | C5   | 1.3917 (18) |
| S1   | C11  | 1.7776 (15) | C5   | C6   | 1.3869 (18) |
| F1   | C10  | 1.3709 (16) | C5   | C9   | 1.5095 (17) |
| F2   | C10  | 1.3660 (15) | C7   | C8   | 1.496 (2)   |
| F3   | C14  | 1.3540 (16) | C8   | C9   | 1.5323 (19) |
| O1   | C6   | 1.3982 (15) | C9   | C10  | 1.5210 (19) |
| O1   | C7   | 1.3679 (17) | C11  | C12  | 1.389 (2)   |
| O2   | C7   | 1.2011 (17) | C11  | C16  | 1.3925 (19) |
| C1   | C2   | 1.3828 (19) | C12  | C13  | 1.384 (2)   |
| C1   | C6   | 1.3840 (18) | C13  | C14  | 1.375 (2)   |
| C2   | C3   | 1.388 (2)   | C14  | C15  | 1.374 (2)   |
| C3   | C4   | 1.3889 (19) | C15  | C16  | 1.385 (2)   |

**Table 3 Bond angles for 3ab.**

| Atom Atom Atom | Angle/° | Atom Atom Atom | Angle/° |
|----------------|---------|----------------|---------|
|----------------|---------|----------------|---------|



|     |    |     |             |     |     |     |             |
|-----|----|-----|-------------|-----|-----|-----|-------------|
| C11 | S1 | C10 | 99.40 (7)   | C10 | C9  | C8  | 110.57 (11) |
| C7  | O1 | C6  | 120.35 (11) | F1  | C10 | S1  | 110.59 (9)  |
| C2  | C1 | C6  | 119.17 (13) | F1  | C10 | C9  | 110.32 (10) |
| C1  | C2 | C3  | 120.03 (12) | F2  | C10 | S1  | 110.10 (9)  |
| C2  | C3 | C4  | 119.91 (12) | F2  | C10 | F1  | 104.52 (10) |
| C3  | C4 | C5  | 120.95 (13) | F2  | C10 | C9  | 108.58 (10) |
| C4  | C5 | C9  | 123.00 (12) | C9  | C10 | S1  | 112.42 (9)  |
| C6  | C5 | C4  | 117.76 (11) | C12 | C11 | S1  | 120.69 (10) |
| C6  | C5 | C9  | 119.11 (11) | C12 | C11 | C16 | 119.97 (13) |
| C1  | C6 | O1  | 115.75 (12) | C16 | C11 | S1  | 119.32 (11) |
| C1  | C6 | C5  | 122.18 (12) | C13 | C12 | C11 | 120.45 (13) |
| C5  | C6 | O1  | 122.05 (11) | C14 | C13 | C12 | 118.05 (14) |
| O1  | C7 | C8  | 116.81 (11) | F3  | C14 | C13 | 118.20 (13) |
| O2  | C7 | O1  | 117.19 (14) | F3  | C14 | C15 | 118.65 (12) |
| O2  | C7 | C8  | 125.95 (13) | C15 | C14 | C13 | 123.15 (13) |
| C7  | C8 | C9  | 113.38 (11) | C14 | C15 | C16 | 118.41 (13) |
| C5  | C9 | C8  | 108.41 (11) | C15 | C16 | C11 | 119.97 (13) |
| C5  | C9 | C10 | 113.70 (10) |     |     |     |             |

**Table 4 Torsion angles for 3ab.**

| A  | B   | C   | D   | Angle/°     | A   | B   | C   | D   | Angle/°     |
|----|-----|-----|-----|-------------|-----|-----|-----|-----|-------------|
| S1 | C11 | C12 | C13 | 178.28 (11) | C6  | C5  | C9  | C10 | 95.58 (14)  |
| S1 | C11 | C16 | C15 | -           | C7  | O1  | C6  | C1  | -           |
| F3 | C14 | C15 | C16 | 178.68 (10) | C7  | O1  | C6  | C5  | 161.63 (11) |
| O1 | C7  | C8  | C9  | -           | C7  | O1  | C6  | C5  | 19.71 (17)  |
| O2 | C7  | C8  | C9  | 179.72 (12) | C7  | C8  | C9  | C5  | 49.29 (14)  |
| C1 | C2  | C3  | C4  | -39.74 (16) | C7  | C8  | C9  | C10 | -75.97 (14) |
| C2 | C1  | C6  | O1  | 142.73 (13) | C8  | C9  | C10 | S1  | -178.89 (9) |
| C2 | C1  | C6  | C5  | -0.3 (2)    | C8  | C9  | C10 | F1  | 57.17 (13)  |
| C2 | C3  | C4  | C5  | 177.75 (11) | C8  | C9  | C10 | F2  | -56.82 (14) |
| C3 | C4  | C5  | C6  | 0.90 (19)   | C9  | C5  | C6  | O1  | -5.91 (17)  |
| C3 | C4  | C5  | C9  | 0.8 (2)     | C9  | C5  | C6  | C1  | 175.52 (11) |
| C4 | C5  | C6  | O1  | -0.44 (19)  | C10 | S1  | C11 | C12 | 89.82 (12)  |
| C4 | C5  | C9  | C8  | -           | C10 | S1  | C11 | C16 | -91.92 (12) |
| C4 | C5  | C9  | C10 | 176.22 (12) | C11 | S1  | C10 | F1  | -72.33 (9)  |
| C5 | C9  | C10 | S1  | 178.13 (11) | C11 | S1  | C10 | F2  | 42.67 (10)  |
| C5 | C9  | C10 | F1  | -0.43 (18)  | C11 | S1  | C10 | C9  | 163.88 (9)  |
| C5 | C9  | C10 | F2  | 147.91 (12) | C11 | C12 | C13 | C14 | 0.4 (2)     |
|    |     |     |     | -88.69 (15) | C12 | C11 | C16 | C15 | -0.4 (2)    |
|    |     |     |     | 58.89 (13)  | C12 | C13 | C14 | F3  | 179.36 (12) |
|    |     |     |     | -65.05 (13) |     |     |     |     |             |
|    |     |     |     | -           |     |     |     |     |             |

|       |    |    |             |           |     |          |
|-------|----|----|-------------|-----------|-----|----------|
|       |    |    | 179.04 (10) |           |     |          |
| C6 O1 | C7 | O2 | 177.81 (11) | C12C13C14 | C15 | -0.4 (2) |
| C6 O1 | C7 | C8 | 4.44 (16)   | C13C14C15 | C16 | 0.0 (2)  |
| C6 C1 | C2 | C3 | -0.5 (2)    | C14C15C16 | C11 | 0.4 (2)  |
| C6 C5 | C9 | C8 | -27.82 (15) | C16C11C12 | C13 | 0.0 (2)  |
